# Supplementary material for: Knowledge and Perception of Rabies Among School Children in Rabies Endemic Areas of South Bhutan
Source: Preprints.org preprint supplement (doi:10.20944/preprints202101.0378.v1), 2021-01-19
Supplement: Supplementary file 1 [file supplementary]

## Sheet: kap_data05
Uni_key	survey_no	date	school	class	section	age	sex	day_border	hometown	father_occupation	mother_occupation	dog_owned	dog_number	dog_source	dog_keep	dog_vacc	dog_vaccfrequency	dog_operated	black_magic	social_problems	spirit	bad_karma	hygiene	microrganism	ill_others	sick_gohospital	sick_rimdo	sick_local	sick_nothing	sick_other	dog_disease	heard_rabies	heard_healthworker	heard_livestock	heard_friends	heard_media	heard_teacher	heard_internet	heard_dontremember	cause_phycho	cause_spirit	cause_virus	cause_stravation	cause_bacteria	cause_poison	cause_dontknow	rabies_source	rabies_bat	rabies_birds
1	G001	2020-02-14	GMSS	8	A	15	Female	Day scholar	Village	Private/coorporate employee	Housewife	Yes	1	Given by neighbour's/friends	Keep inside the house compound all the time	Yes	Every year	No	No	No	No	No	Yes	Yes	No	Yes	Yes	No	No	No	Rabies, cough	Yes	Yes	No	No	Yes	Yes	Yes	No	No	No	No	No	Yes	Yes	No	Dog	No	No
2	G002	2020-02-14	GMSS	8	B	12	Female	Day scholar	Village	Government employee	Housewife	No							No	No	No	No	Yes	Yes	No	Yes	Yes	No	No	No	Rabies	Yes	Yes	Yes	Yes	Yes	Yes	Yes	No	No	No	Yes	No	No	No	No	Dog	No	No
3	G003	2020-02-14	GMSS	8	B	15	Female	Day scholar	Village	Farmer	Farmer	Yes	7	I don't know	Free roaming all the time	No		No	No	No	No	No	No	Yes	No	Yes	Yes	No	No	No	TVT	Yes	No	No	No	No	Yes	No	No	No	No	Yes	No	No	No	No	Dog	Yes	No
4	G004	2020-02-14	GMSS	8	A	14	Female	Day scholar	Village	Military (RBP,RBA,RBG)	Housewife	Yes	7	I don't know	Free roaming all the time	Yes	Sometimes	No	No	No	No	No	No	Yes	No	Yes	No	No	No	No	TVT	Yes	No	No	No	No	Yes	No	No	No	No	Yes	No	Yes	No	No	I don't know	No	No
5	G005	2020-02-14	GMSS	8	A	16	Male	Day scholar	Town	Bussinessman	Bussinesswomen	Yes	1	I don't know	Keep inside the house compound all the time	Yes	Every year	I don't know	Yes	Yes	Yes	No	Yes	Yes	No	Yes	Yes	No	No	No	Rabies, Canine distemper	Yes	Yes	No	No	Yes	Yes	Yes	No	Yes	No	Yes	No	Yes	No	No	Dog	Yes	No
6	G006	2020-02-14	GMSS	8	A	13	Female	Day scholar	Town	Government employee	Government employee	No							No	No	No	No	Yes	Yes	No	Yes	Yes	No	No	No	Rabies, TVT	Yes	No	No	Yes	No	No	Yes	No	Yes	No	No	Yes	No	No	No	Dog	No	No
7	G007	2020-02-14	GMSS	8	A	13	Female	Day scholar	Village	Others(Specify)...........	Bussinesswomen	Yes	3	Adopted from street	Free roaming all the time	Yes	Sometimes	Yes	No	No	No	No	Yes	Yes	No	Yes	Yes	No	No	No	Rabies, TVT	Yes	No	No	No	No	Yes	No	No	No	No	Yes	No	Yes	No	No	Dog	No	No
8	G008	2020-02-14	GMSS	8	A	15	Female	Day scholar	Village	Farmer	Farmer	No							No	Yes	No	No	No	Yes	No	Yes	No	No	No	No	Mange	Yes	Yes	No	No	No	Yes	No	No	No	No	Yes	No	Yes	Yes	No	Dog	Yes	No
9	G009	2020-02-14	GMSS	8	B	15	Female	Day scholar	Town	Bussinessman	Bussinesswomen	No							No	Yes	No	No	Yes	No	No	Yes	Yes	No	No	No	Rabies	Yes	Yes	No	No	No	No	No	No	No	No	Yes	No	No	No	No	Dog	No	No
10	G010	2020-02-14	GMSS	8	B	15	Female	Day scholar	Village	Farmer	Farmer	Yes	1	I don't know	Let it roam freely outside during daytime	No		No	No	No	Yes	No	Yes	Yes	No	Yes	Yes	No	No	No	Rabies	Yes	Yes	No	No	No	No	No	No	No	No	No	No	No	No	Yes	Dog	No	No
11	G011	2020-02-14	GMSS	8	A	15	Male	Day scholar	Town	Government employee	Bussinesswomen	No							No	No	No	No	Yes	Yes	No	Yes	No	No	No	No	Rabies & mange	Yes	Yes	No	No	No	No	No	No	No	No	Yes	No	Yes	No	No	Dog	No	No
12	G012	2020-02-14	GMSS	8	B	15	Female	Day scholar	Village	Farmer	Farmer	Yes	7	I don't know	Free roaming all the time	No		No	No	No	No	No	No	Yes	No	Yes	Yes	No	No	No	Rabies, TVT	Yes	Yes	No	Yes	No	Yes	No	No	No	No	Yes	No	No	Yes	No	Dog	Yes	No
13	G013	2020-02-14	GMSS	8	B	14	Female	Day scholar	Village	Farmer	Farmer	No							No	No	No	No	Yes	Yes	Yes	Yes	No	No	No	No	Rabies	Yes	No	No	No	No	Yes	No	No	No	No	No	Yes	Yes	No	No	Dog	No	No
14	G014	2020-02-14	GMSS	8	A	16	Female	Day scholar	Village	Farmer	Farmer	Yes	1	I don't know	Let it roam freely outside during daytime	Yes	Sometimes	No	Yes	No	No	No	Yes	Yes	No	Yes	Yes	No	No	No	Rabies	Yes	No	No	No	No	Yes	No	No	No	No	Yes	No	No	Yes	No	Dog	No	No
15	G015	2020-02-14	GMSS	8	A	13	Female	Day scholar	Village	Military (RBP,RBA,RBG)	Housewife	No							No	No	No	No	Yes	Yes	No	Yes	Yes	No	No	No	TVT	Yes	No	No	No	No	Yes	No	No	No	No	Yes	No	Yes	Yes	No	Dog	No	No
16	G016	2020-02-14	GMSS	8	A	15	Female	Day scholar	Village	Farmer	Farmer	No							No	No	No	No	Yes	Yes	No	Yes	No	No	No	No	Rabies	Yes	No	No	No	No	Yes	No	No	Yes	No	No	No	Yes	Yes	No	Dog	No	No
17	G017	2020-02-14	GMSS	8	B	14	Female	Day scholar	Village	Military (RBP,RBA,RBG)	Housewife	Yes	7	I don't know	Free roaming all the time	No		No	No	No	No	No	No	Yes	No	Yes	No	No	No	No	Rabies	Yes	No	No	No	No	Yes	No	No	No	No	Yes	No	No	No	No	Dog	No	No
18	G018	2020-02-14	GMSS	8	A	15	Female	Day scholar	Village	Farmer	Farmer	Yes	7	I don't know	Free roaming all the time	No		No	No	No	No	No	No	Yes	No	Yes	Yes	Yes	No	No		Yes	Yes	No	Yes	Yes	No	Yes	No	No	No	Yes	No	No	No	No	Dog	Yes	No
19	G019	2020-02-14	GMSS	8	A	13	Female	Day scholar	Town	Government employee	Housewife	No							No	No	No	No	Yes	Yes	No	Yes	Yes	No	No	No	Rabies	Yes	Yes	No	No	No	No	No	No	Yes	No	No	Yes	No	No	No	Dog	No	No
20	G020	2020-02-14	GMSS	8	A	18	Male	Day scholar	Village	Others(Specify)...........	Housewife	Yes	1	I don't know	Free roaming all the time	Yes	I don't know	I don't know	No	No	No	No	No	No	Yes	Yes	No	No	No	No	Rabies	Yes	No	No	Yes	No	No	No	No	No	No	Yes	Yes	Yes	Yes	No	Dog	No	No
21	G021	2020-02-14	GMSS	8	A	14	Female	Day scholar	Village	Private/coorporate employee	Housewife	No							No	Yes	No	Yes	No	Yes	No	Yes	Yes	No	No	No	Rabies	Yes	Yes	No	Yes	Yes	No	Yes	No	No	No	Yes	No	No	Yes	No	Dog	No	No
22	G022	2020-02-14	GMSS	8	B	13	Female	Day scholar	Town	Government employee	Others(Specify)................	No							No	No	No	No	Yes	Yes	Yes	Yes	Yes	No	No	No	Rabies & mange	Yes	Yes	No	No	Yes	Yes	Yes	No	No	No	Yes	Yes	Yes	Yes	No	Dog	No	No
23	G023	2020-02-14	GMSS	8	A	13	Male	Day scholar	Village	Private/coorporate employee	Housewife	Yes	1	Given by neighbour's/friends	Let it roam freely outside during daytime	I don't know	I don't know	I don't know	No	No	No	No	Yes	Yes	No	Yes	Yes	No	No	No	Rabies & mange	Yes	Yes	No	No	No	No	No	No	No	No	Yes	No	No	Yes	No	Dog	Yes	No
24	G024	2020-02-14	GMSS	8	B	13	Female	Day scholar	Town	Bussinessman	Bussinesswomen	No							No	No	No	No	Yes	No	No	Yes	Yes	No	No	No	Rabies	Yes	No	No	Yes	No	No	Yes	No	No	No	Yes	No	Yes	Yes	No	Dog	Yes	No
25	G025	2020-02-14	GMSS	8	B	14	Female	Day scholar	Town	Government employee	Bussinesswomen	No							No	No	No	No	Yes	Yes	No	Yes	No	No	No	No	Rabies	Yes	Yes	No	No	No	No	No	No	No	No	Yes	No	Yes	Yes	No	Bat	Yes	No
26	G026	2020-02-14	GMSS	8	A	14	Female	Day scholar	Town	Farmer	Farmer	No							No	No	No	No	No	Yes	No	Yes	No	Yes	No	No	Rabies	Yes	Yes	No	No	No	Yes	No	No	Yes	Yes	Yes	Yes	Yes	Yes	No	Dog	Yes	Yes
27	G027	2020-02-14	GMSS	8	A	17	Female	Day scholar	Town	Bussinessman	Housewife	Yes	1	Given by neighbour's/friends	Keep inside the house compound all the time	Yes	Sometimes	No	No	No	No	No	Yes	Yes	No	Yes	Yes	No	No	No	Rabies,skin diseases, coughing	Yes	Yes	No	Yes	No	Yes	Yes	No	No	No	Yes	No	Yes	No	No	Dog	No	No
28	G028	2020-02-14	GMSS	8	A	12	Male	Day scholar	Village	Bussinessman	Government employee	Yes	1	Purchased from other people in Bhutan	Keep inside the house compound all the time	Yes	Every year	No	No	No	No	No	Yes	Yes	No	Yes	Yes	No	No	No	Rabies, Injuries	Yes	Yes	Yes	Yes	Yes	Yes	Yes	No	No	No	Yes	Yes	No	No	No	Dog	Yes	No
29	G029	2020-02-14	GMSS	8	B	13	Female	Day scholar	Village	Bussinessman	Housewife	No							Yes	No	Yes	No	Yes	Yes	No	Yes	Yes	No	No	No	Rabies	Yes	Yes	No	No	Yes	No	No	No	Yes	No	Yes	No	No	No	No	Dog	Yes	No
30	G030	2020-02-14	GMSS	8	A	13	Female	Day scholar	Town	Government employee	Government employee	Yes	1	Purchased from other people in Bhutan	Keep inside the house compound all the time	Yes	I don't know	No	No	No	No	No	Yes	Yes	No	Yes	No	No	No	No	Rabies	Yes	Yes	No	Yes	Yes	Yes	No	No	Yes	Yes	Yes	Yes	Yes	Yes	No	Dog	No	No
31	G031	2020-02-14	GMSS	8	B	14	Male	Day scholar	Town	Bussinessman	Bussinesswomen	Yes	1	Given by neighbour's/friends	Keep inside the house compound all the time	Yes	Sometimes	No	No	No	No	No	Yes	Yes	No	Yes	Yes	No	No	No	Rabies	Yes	Yes	No	No	No	No	No	No	No	No	Yes	No	No	Yes	No	Dog	Yes	No
32	G032	2020-02-14	GMSS	8	C	13	Male	Day scholar	Village	Bussinessman	Housewife	Yes	3	Given by neighbour's/friends	Let it roam freely outside during daytime	Yes	I don't know	No	Yes	Yes	No	No	No	No	No	Yes	Yes	No	No	No	Rabies & mange	Yes	No	No	No	No	No	No	Yes	No	No	Yes	No	Yes	No	No	Dog	No	No
33	G033	2020-02-14	GMSS	8	A	13	Male	Day scholar	Village	Government employee	Government employee	No							No	No	No	No	Yes	Yes	No	Yes	No	No	No	No	Rabies & mange	Yes	Yes	Yes	Yes	Yes	Yes	Yes	No	No	No	Yes	Yes	Yes	No	No	Dog	Yes	Yes
34	G034	2020-02-14	GMSS	8	B	13	Male	Day scholar	Village	Private/coorporate employee	Housewife	No							No	No	No	No	Yes	Yes	No	Yes	Yes	No	No	No	Rabies, Injuries	Yes	Yes	No	Yes	No	No	No	No	No	No	No	No	No	Yes	No	Dog	No	No
35	G035	2020-02-14	GMSS	8	B	14	Male	Day scholar	Village	Private/coorporate employee	Housewife	No							No	Yes	No	No	Yes	Yes	Yes	Yes	Yes	No	No	No	Rabies & mange	Yes	Yes	Yes	Yes	Yes	Yes	No	No	No	No	Yes	Yes	Yes	Yes	No	Dog	No	No
36	G036	2020-02-14	GMSS	8	A	14	Male	Day scholar	Town	Government employee	Housewife	No							No	No	No	No	Yes	No	No	Yes	Yes	Yes	No	No	Rabies,ringworm,kashiokor	Yes	Yes	No	No	No	No	No	No	Yes	Yes	No	No	Yes	Yes	No	Dog	Yes	No
37	G037	2020-02-14	GMSS	8	B	15	Male	Day scholar	Village	Others(Specify)...........	Housewife	Yes	1	I don't know	Let it roam freely outside during daytime	I don't know	I don't know	I don't know	No	No	No	No	Yes	No	No	Yes	No	No	No	No	Rabies, wound, ringworm	Yes	Yes	No	Yes	No	Yes	No	No	Yes	No	Yes	No	Yes	No	No	Dog	No	No
38	G038	2020-02-14	GMSS	8	B	14	Male	Day scholar	Village	Military (RBP,RBA,RBG)	Housewife	No							No	Yes	No	Yes	Yes	Yes	No	Yes	Yes	No	No	No	Rabies	Yes	No	Yes	Yes	Yes	No	No	No	No	No	Yes	No	Yes	Yes	No	Dog	Yes	No
39	G039	2020-02-14	GMSS	8	B	14	Male	Day scholar	Village	Military (RBP,RBA,RBG)	Housewife	Yes	3	I don't know	Free roaming all the time	No		No	No	No	No	No	No	Yes	No	Yes	No	No	No	No	Rabies	Yes	No	No	No	No	Yes	No	No	No	No	Yes	No	No	No	No	Dog	No	No
40	G040	2020-02-14	GMSS	8	A	15	Male	Day scholar	Town	Military (RBP,RBA,RBG)	Housewife	No							No	No	No	No	Yes	Yes	No	Yes	No	No	No	No	Rabies & mange	Yes	No	No	No	No	Yes	No	No	No	No	Yes	No	Yes	No	No	Dog	Yes	No
41	G041	2020-02-14	GMSS	8	B	14	Female	Day scholar	Village	Government employee	Housewife	No							No	No	No	No	Yes	No	No	Yes	No	No	No	No	Rabies	Yes	No	No	No	Yes	No	No	No	No	No	Yes	No	No	No	No	Dog	No	No
42	G042	2020-02-14	GMSS	9	B	15	Female	Day scholar	Village	Others(Specify)...........	Farmer	Yes	1	Given by neighbour's/friends	Keep inside the house compound all the time	Yes	I don't know	Yes	No	No	No	No	No	Yes	No	Yes	Yes	No	No	No	Rabies	Yes	No	No	No	No	No	No	Yes	No	No	No	No	Yes	Yes	No	Dog	No	No
43	G043	2020-02-14	GMSS	9	B	14	Female	Day scholar	Town	Others(Specify)...........	Housewife	No							No	Yes	No	No	Yes	Yes	No	Yes	No	No	No	No	Rabies, ringworm Rabies, ringworm	Yes	No	No	No	Yes	Yes	No	No	No	No	Yes	Yes	Yes	Yes	No	Dog	Yes	No
44	G044	2020-02-14	GMSS	9	B	14	Female	Day scholar	Town	Military (RBP,RBA,RBG)	Housewife	No							No	Yes	No	No	Yes	Yes	No	Yes	No	No	No	No	Rabies & mange	Yes	Yes	No	No	No	Yes	No	No	No	No	Yes	No	Yes	Yes	No	Dog	No	No
45	G045	2020-02-14	GMSS	9	C	17	Female	Day scholar	Village	Farmer	Farmer	Yes	2	Given by neighbour's/friends	Let it roam freely outside during daytime	I don't know	I don't know	I don't know	Yes	No	No	No	Yes	No	No	Yes	Yes	No	No	No	Rabies & mange	Yes	Yes	No	No	No	No	Yes	No	No	No	No	No	No	Yes	No	Dog	No	No
46	G046	2020-02-14	GMSS	9	C	14	Female	Day scholar	Village	Farmer	Farmer	No							Yes	No	No	No	Yes	No	No	Yes	Yes	No	No	No	Rabies & mange	Yes	Yes	No	No	No	No	Yes	No	No	No	No	No	No	Yes	No	Dog	No	No
47	G047	2020-02-14	GMSS	9	C	17	Female	Day scholar	Town	Bussinessman	Bussinesswomen	Yes	2	I don't know	Keep inside the house compound all the time	Yes	Sometimes	Yes	Yes	No	No	No	No	No	No	Yes	No	No	No	No	Rabies	Yes	Yes	No	No	Yes	Yes	Yes	No	No	No	Yes	No	No	No	No	Dog	No	No
48	G048	2020-02-14	GMSS	9	C	17	Female	Day scholar	Town	Military (RBP,RBA,RBG)	Housewife	Yes	3	I don't know	Free roaming all the time	I don't know	I don't know	I don't know	No	No	Yes	No	No	No	No	Yes	No	No	No	No	Ring worm, Physical problem	Yes	No	No	No	No	No	No	Yes	No	No	No	No	No	Yes	No	Dog	No	No
49	G049	2020-02-14	GMSS	9	A	14	Female	Day scholar	Town	Farmer	Farmer	No							No	Yes	Yes	No	No	No	No	Yes	No	No	No	No	Mange	Yes	No	No	Yes	No	No	No	No	No	No	No	No	Yes	No	No	Dog	No	No
50	G050	2020-02-14	GMSS	9	C	14	Female	Day scholar	Village	Farmer	Farmer	Yes	1	I don't know	Free roaming all the time	I don't know	I don't know	Yes	No	No	No	No	Yes	No	No	Yes	Yes	No	No	No	Ringworm, psychological problem	Yes	No	No	No	No	No	No	Yes	Yes	No	No	No	Yes	No	No	Dog	No	No
51	G051	2020-02-14	GMSS	9	A	15	Female	Day scholar	Town	Military (RBP,RBA,RBG)	Housewife	No							No	No	No	No	Yes	Yes	No	Yes	Yes	No	No	No	Rabies & mange	Yes	Yes	No	No	Yes	Yes	No	No	No	No	No	Yes	Yes	Yes	No	Dog	No	Yes
52	G052	2020-02-14	GMSS	9	C	14	Female	Day scholar	Town	Military (RBP,RBA,RBG)	Housewife	No							No	No	No	No	No	Yes	No	Yes	Yes	No	No	No	Rabies & mange	Yes	No	No	No	No	No	No	Yes	No	No	No	Yes	No	No	No	Dog	No	No
53	G053	2020-02-14	GMSS	8	B	15	Female	Day scholar	Village	Farmer	Farmer	Yes	1	I don't know	Free roaming all the time	I don't know	I don't know	I don't know	No	No	No	No	Yes	Yes	No	Yes	Yes	No	No	No	Rabies	Yes	Yes	No	No	No	No	No	No	No	No	No	No	No	No	Yes	Dog	No	No
54	G054	2020-02-14	GMSS	9	C	14	Female	Day scholar	Town	Private/coorporate employee	Housewife	No							Yes	No	No	Yes	Yes	Yes	No	Yes	Yes	No	No	No	Rabies	Yes	No	No	No	No	Yes	No	No	No	No	No	No	No	No	Yes	Dog	No	No
55	G055	2020-02-14	GMSS	9	B	15	Female	Day scholar	Village	Others(Specify)...........	Housewife	Yes	2	Given by neighbour's/friends	Let it roam freely outside during daytime	I don't know	I don't know	No	No	No	No	No	Yes	No	No	Yes	No	No	No	No	Rabies & mange	Yes	Yes	No	Yes	No	Yes	No	No	No	No	Yes	No	Yes	Yes	No	Dog	No	No
56	G056	2020-02-14	GMSS	9	B	15	Female	Day scholar	Village	Others(Specify)...........	Government employee	No							No	No	No	No	Yes	Yes	No	Yes	No	No	No	No	Rabies & mange	Yes	No	No	Yes	No	Yes	No	No	Yes	No	Yes	No	No	No	No	Dog	No	No
57	G057	2020-02-14	GMSS	9	C	15	Female	Day scholar	Town	Military (RBP,RBA,RBG)	Housewife	No							No	No	No	No	No	Yes	No	Yes	No	No	No	No	Rabies & mange	Yes	Yes	No	Yes	No	Yes	No	No	No	No	Yes	No	Yes	No	No	Dog	Yes	No
58	G058	2020-02-14	GMSS	9	C	16	Female	Day scholar	Town	Military (RBP,RBA,RBG)	Housewife	No							No	No	No	No	No	Yes	No	Yes	No	No	No	No	Rabies & mange	Yes	No	No	No	Yes	No	No	No	No	No	Yes	No	No	No	No	Cat	Yes	Yes
59	G059	2020-02-14	GMSS	9	C	18	Female	Day scholar	Town	Military (RBP,RBA,RBG)	Bussinesswomen	No							No	No	No	No	No	Yes	No	Yes	No	No	No	No	Rabies, ringworm Rabies, ringworm	Yes	Yes	No	Yes	No	Yes	No	No	No	No	Yes	No	Yes	No	No	Dog	Yes	No
60	G060	2020-02-14	GMSS	9	C	14	Female	Day scholar	Town	Government employee	Housewife	No							No	No	No	Yes	Yes	No	No	Yes	Yes	No	No	No	Rabies	Yes	No	No	Yes	Yes	No	No	No	Yes	No	Yes	No	No	No	No	Dog	No	No
61	G061	2020-02-14	GMSS	9	C	15	Male	Day scholar	Town	Others(Specify)...........	Housewife	No							No	No	No	No	Yes	Yes	No	Yes	Yes	No	No	No	Rabies	Yes	Yes	No	Yes	No	No	No	No	Yes	No	Yes	No	Yes	No	No	Dog	No	No
62	G062	2020-02-14	GMSS	9	A	16	Female	Day scholar	Town	Farmer	Farmer	Yes	1	Purchased from other people in Bhutan	Free roaming all the time	No		Yes	No	No	No	No	No	Yes	No	Yes	No	No	No	No	Rabies	Yes	Yes	No	No	No	No	No	No	Yes	No	Yes	Yes	Yes	No	No	Dog	No	No
63	G063	2020-02-14	GMSS	9	C	15	Female	Day scholar	Town	Others(Specify)...........	Bussinesswomen	Yes	1	Adopted from street	Free roaming all the time	No		No	No	No	No	No	Yes	Yes	Yes	Yes	Yes	Yes	No	No	Rabies & mange	Yes	No	No	Yes	Yes	Yes	Yes	No	No	No	Yes	Yes	Yes	No	No	Dog	No	No
64	G064	2020-02-14	GMSS	9	C	14	Male	Day scholar	Village	Farmer	Farmer	No							No	No	No	Yes	Yes	Yes	No	Yes	No	No	No	No	Rabies	Yes	No	Yes	No	No	Yes	Yes	No	No	No	No	Yes	No	Yes	No	Dog	Yes	No
65	G065	2020-02-14	GMSS	9	C	15	Male	Day scholar	Town	Others(Specify)...........	Bussinesswomen	No							No	No	No	No	Yes	Yes	No	Yes	Yes	No	No	No	Rabies	Yes	Yes	Yes	Yes	Yes	Yes	No	No	No	No	Yes	No	Yes	Yes	No	Dog	No	No
66	G066	2020-02-14	GMSS	9	B	14	Male	Day scholar	Village	Bussinessman	Housewife	Yes	2	Given by neighbour's/friends	Let it roam freely outside during daytime	Yes	Sometimes	Yes	No	No	No	No	Yes	No	No	Yes	No	No	No	No	Rabies & mange	Yes	No	No	No	No	Yes	No	No	Yes	No	No	Yes	Yes	Yes	No	Dog	No	No
67	G067	2020-02-14	GMSS	9	B	14	Female	Day scholar	Town	Others(Specify)...........	Bussinesswomen	Yes	3	Given by neighbour's/friends	Keep inside the house compound all the time	Yes	Sometimes	I don't know	No	No	No	Yes	Yes	No	No	Yes	Yes	No	No	No	Rabies & mange	Yes	No	No	Yes	No	No	No	No	No	No	No	No	No	Yes	No	Dog	Yes	Yes
68	G068	2020-02-14	GMSS	9	A	14	Female	Day scholar	Town	Government employee	Private/coorporate employee	Yes	1	Adopted from street	Keep inside the house compound all the time	No		I don't know	No	No	No	No	Yes	Yes	No	Yes	No	No	No	No	Rabies	Yes	Yes	No	No	No	No	No	No	Yes	No	Yes	No	Yes	No	No	Dog	No	No
69	G069	2020-02-14	GMSS	9	D	14	Female	Day scholar	Town	Military (RBP,RBA,RBG)	Housewife	Yes	1	I don't know	Keep inside the house compound all the time	Yes	Sometimes	Yes	No	No	No	No	Yes	Yes	No	Yes	Yes	No	No	No	Ring worm, Psychological	No	No	No	No	No	No	No	No	No	No	No	No	No	No	No		No	No
70	G070	2020-02-14	GMSS	9	B	13	Female	Day scholar	Town	Private/coorporate employee	Housewife	No							No	No	No	No	No	Yes	No	Yes	No	No	No	No	Rabies, ringworm rabies, ringworm	Yes	Yes	No	No	No	No	No	No	No	No	No	No	No	No	Yes	Dog	No	No
71	G071	2020-02-14	GMSS	9	B	14	Female	Day scholar	Town	Government employee	Housewife	Yes	1	Given by neighbour's/friends	Keep inside the house compound all the time	Yes	I don't know	Yes	No	No	No	No	Yes	Yes	No	Yes	Yes	No	No	No	Ringworm, Psychological problem	Yes	Yes	No	Yes	No	No	Yes	No	Yes	No	No	No	No	No	No	Dog	No	No
72	G072	2020-02-14	GMSS	9	C	15	Male	Day scholar	Village	Government employee	Government employee	No							No	No	No	No	No	Yes	No	Yes	No	No	No	No	Rabies	Yes	Yes	No	No	No	No	No	No	No	No	Yes	No	No	No	No	Dog	Yes	No
73	G073	2020-02-14	GMSS	9	C	14	Female	Day scholar	Village	Government employee	Housewife	Yes	6	Adopted from street	Free roaming all the time	No		No	No	No	No	No	No	Yes	No	Yes	Yes	No	No	No	Rabies	Yes	No	No	Yes	No	Yes	No	No	No	No	Yes	No	No	No	No	Dog	No	No
74	G074	2020-02-14	GMSS	9	A	15	Female	Day scholar	Village	Bussinessman	Housewife	No							No	No	No	No	Yes	Yes	No	Yes	No	No	No	No	i don;t know	No	No	No	No	No	No	No	No	No	No	No	No	No	No	No		No	No
75	G075	2020-02-14	GMSS	9	C	15	Female	Day scholar	Town	Government employee	Government employee	No							No	Yes	No	No	Yes	No	No	Yes	Yes	Yes	No	No	Rabies & mange	Yes	Yes	Yes	Yes	No	Yes	No	No	Yes	No	Yes	Yes	Yes	No	No	Dog	No	No
76	G076	2020-02-14	GMSS	9	A	14	Female	Day scholar	Village	Others(Specify)...........	Housewife	Yes	3	I don't know	Free roaming all the time	No		No	No	Yes	No	No	Yes	Yes	No	Yes	No	No	No	No	Rabies	Yes	Yes	No	No	No	Yes	No	No	No	No	Yes	Yes	Yes	Yes	No	Dog	No	No
77	G077	2020-02-14	GMSS	9	B	19	Female	Day scholar	Town	Farmer	Farmer	Yes	1	I don't know	Keep inside the house compound all the time	Yes	I don't know	No	No	Yes	No	No	No	Yes	No	Yes	Yes	Yes	No	No	Rabies	Yes	No	No	Yes	No	No	No	No	No	No	Yes	No	Yes	Yes	No	Dog	No	No
78	G078	2020-02-14	GMSS	9	B	14	Female	Day scholar	Village	Others(Specify)...........	Bussinesswomen	No							No	No	No	No	Yes	No	No	Yes	No	No	No	No	Rabies	Yes	Yes	No	No	No	No	No	No	No	No	No	Yes	No	No	No	Dog	Yes	No
79	G079	2020-02-14	GMSS	9	C	14	Female	Day scholar	Village	Farmer	Farmer	No							No	No	No	No	Yes	Yes	Yes	Yes	No	No	No	No	Rabies	Yes	Yes	No	No	No	No	No	No	No	No	No	No	Yes	No	No	Dog	No	No
80	G080	2020-02-14	GMSS	9	C	14	Female	Day scholar	Town	Government employee	Bussinesswomen	No							No	No	No	No	Yes	Yes	Yes	Yes	No	No	No	No	Rabies	Yes	No	No	No	No	No	Yes	No	No	No	No	No	Yes	No	No	Dog	No	No
81	G081	2020-02-14	GMSS	9	C	16	Female	Day scholar	Village	Others(Specify)...........	Housewife	Yes	1	Given by neighbour's/friends	Let it roam freely outside during daytime	I don't know	I don't know	I don't know	No	No	No	No	No	Yes	No	Yes	No	No	No	No	Rabies	Yes	No	No	Yes	No	No	No	Yes	No	No	No	No	No	No	Yes	I don't know	No	Yes
82	G082	2020-02-14	GMSS	9	B	16	Male	Day scholar	Town	Military (RBP,RBA,RBG)	Housewife	No							No	No	No	No	Yes	No	No	Yes	No	No	No	No	Rabies & mange	Yes	Yes	No	No	No	No	No	No	Yes	No	Yes	No	Yes	No	No	Dog	No	No
83	G083	2020-02-14	GMSS	9	A	16	Male	Day scholar	Village	Farmer	Farmer	Yes	2	Given by neighbour's/friends	Free roaming all the time	Yes	I don't know	Yes	No	Yes	No	No	Yes	Yes	No	Yes	Yes	Yes	No	No	Mange	No	No	No	No	No	No	No	No	No	No	No	No	No	No	No		No	No
84	G084	2020-02-14	GMSS	9	B	15	Male	Day scholar	Town	Others(Specify)...........	Farmer	No							No	No	No	No	Yes	Yes	No	Yes	Yes	No	No	No	Rabies	Yes	Yes	No	Yes	No	Yes	No	No	Yes	No	Yes	No	Yes	No	No	Dog	Yes	No
85	G085	2020-02-14	GMSS	9	B	16	Male	Day scholar	Town	Military (RBP,RBA,RBG)	Housewife	No							No	No	Yes	No	Yes	Yes	No	Yes	Yes	No	No	No	Rabies & mange	Yes	Yes	No	No	No	Yes	No	No	No	No	Yes	No	Yes	Yes	No	Dog	Yes	No
86	G086	2020-02-14	GMSS	9	B	16	Male	Day scholar	Village	Bussinessman	Housewife	Yes	3	Adopted from street	Free roaming all the time	Yes	Sometimes	Yes	No	No	No	No	Yes	Yes	No	Yes	No	No	No	No	Rabies & mange	Yes	Yes	No	No	Yes	No	Yes	No	No	No	Yes	No	No	No	No	Bat	Yes	No
87	G087	2020-02-14	GMSS	9	B	15	Male	Day scholar	Town	Military (RBP,RBA,RBG)	Housewife	No							No	No	No	No	No	Yes	No	Yes	No	No	No	No	Rabies	Yes	Yes	No	Yes	No	Yes	Yes	No	No	No	Yes	No	No	No	No	Dog	No	No
88	G088	2020-02-14	GMSS	9	B	14	Male	Day scholar	Town	Military (RBP,RBA,RBG)	Housewife	No							No	No	No	No	Yes	Yes	No	No	Yes	No	No	No	Rabies, ringworm Rabies, ringworm	Yes	Yes	No	No	Yes	No	No	No	No	No	Yes	No	Yes	Yes	No	Dog	Yes	No
89	G089	2020-02-14	GMSS	9	A	15	Female	Day scholar	Town	Private/coorporate employee	Private/coorporate employee	No							Yes	No	Yes	No	No	No	No	Yes	Yes	No	No	No	Rabies	Yes	Yes	No	No	No	No	No	No	No	No	Yes	No	No	No	No	Dog	Yes	No
90	G090	2020-02-14	GMSS	9	A	17	Male	Day scholar	Village	Farmer	Farmer	Yes	1	Purchased from other people in Bhutan	Keep inside the house compound all the time	Yes	Every year	Yes	No	Yes	No	No	Yes	Yes	No	Yes	Yes	Yes	No	No	Rabies	Yes	Yes	Yes	Yes	Yes	Yes	Yes	No	No	No	Yes	No	No	No	No	Dog	Yes	No
91	G091	2020-02-14	GMSS	9	A	14	Female	Day scholar	Town	Military (RBP,RBA,RBG)	Housewife	No							No	No	No	Yes	Yes	Yes	No	Yes	Yes	No	No	No	Mange	Yes	No	No	Yes	No	Yes	No	No	Yes	No	Yes	No	Yes	No	No	Dog	No	No
92	G092	2020-02-14	GMSS	9	A	15	Female	Day scholar	Town	Military (RBP,RBA,RBG)	Housewife	Yes	2	Given by neighbour's/friends	Keep inside the house compound all the time	Yes	Sometimes	I don't know	No	No	No	No	Yes	Yes	No	Yes	Yes	No	No	No	Rabies & mange	Yes	No	No	Yes	No	No	No	No	Yes	No	Yes	No	Yes	No	No	Dog	No	No
93	G093	2020-02-14	GMSS	9	C	15	Female	Day scholar	Village	Farmer	Farmer	No							No	Yes	No	No	Yes	Yes	No	Yes	Yes	Yes	No	No	Rabies	Yes	No	No	No	No	Yes	No	No	No	No	Yes	No	No	Yes	No	Dog	Yes	No
94	G094	2020-02-14	GMSS	9	A	14	Female	Day scholar	Village	Bussinessman	Bussinesswomen	No							No	Yes	No	No	No	Yes	No	Yes	Yes	No	No	No	Rabies	Yes	Yes	No	Yes	Yes	Yes	Yes	No	Yes	Yes	Yes	No	Yes	Yes	No	Dog	Yes	No
95	G095	2020-02-14	GMSS	9	A	15	Female	Day scholar	Town	Farmer	Farmer	Yes	2	Given by neighbour's/friends	Let it roam freely outside during daytime	Yes	Sometimes	No	No	No	No	No	Yes	Yes	No	Yes	Yes	Yes	No	No	Rabies	Yes	No	Yes	No	No	No	No	No	Yes	No	Yes	Yes	Yes	Yes	No	Dog	No	No
96	G096	2020-02-14	GMSS	9	B	14	Male	Day scholar	Village	Private/coorporate employee	Government employee	No							No	No	No	No	Yes	Yes	No	Yes	Yes	No	No	No	Rabies	Yes	Yes	No	No	No	No	Yes	No	Yes	No	Yes	No	Yes	No	No	Dog	Yes	No
97	G097	2020-02-14	GMSS	9	A	13	Female	Day scholar	Village	Bussinessman	Housewife	Yes	1	Adopted from street	Let it roam freely outside during daytime	Yes	Every year	No	No	No	No	No	No	Yes	No	Yes	No	No	No	No	Rabies	Yes	Yes	Yes	Yes	No	Yes	Yes	No	No	No	No	No	No	No	Yes	Dog	Yes	No
98	G098	2020-02-14	GMSS	9	B	13	Male	Day scholar	Town	Military (RBP,RBA,RBG)	Others(Specify)................	Yes	1	Given by neighbour's/friends	Let it roam freely outside during daytime	Yes	I don't know	Yes	No	No	No	No	No	Yes	No	Yes	No	No	No	No	Rabies	Yes	Yes	No	No	No	No	No	No	No	No	No	No	No	No	Yes	I don't know	No	No
99	G099	2020-02-14	GMSS	9	A	15	Male	Day scholar	Town	Government employee	Housewife	No							No	Yes	No	No	Yes	Yes	No	Yes	No	No	No	No	Rabies, ringworrm Rabies, ringworm	Yes	Yes	No	No	No	No	No	No	No	No	Yes	Yes	No	No	No	Dog	No	No
100	G100	2020-02-14	GMSS	9	A	14	Male	Day scholar	Town	Bussinessman	Bussinesswomen	No							No	Yes	No	Yes	Yes	Yes	No	Yes	No	No	No	No	Rabies & mange	Yes	Yes	Yes	No	No	No	No	No	No	No	Yes	No	Yes	No	No	Dog	Yes	No
101	G101	2020-02-14	GMSS	9	A	15	Female	Day scholar	Village	Government employee	Housewife	No							No	No	No	No	Yes	Yes	No	Yes	No	No	No	No	Rabies	Yes	Yes	No	Yes	No	No	No	No	No	No	Yes	No	No	No	No	Dog	No	No
102	G102	2020-02-14	GMSS	9	A	14	Female	Day scholar	Village	Private/coorporate employee	Others(Specify)................	No							No	No	No	No	Yes	Yes	No	Yes	No	No	No	No	Rabies	Yes	Yes	No	Yes	No	Yes	No	No	No	No	Yes	No	Yes	No	No	Dog	Yes	No
103	G103	2020-02-14	GMSS	9	A	15	Male	Day scholar	Town	Private/coorporate employee	Housewife	No							No	No	Yes	No	Yes	Yes	No	Yes	Yes	No	No	No	Rabies	Yes	Yes	No	Yes	No	No	No	No	Yes	No	No	Yes	No	No	No	Dog	No	No
104	G104	2020-02-14	GMSS	9	A	15	Male	Day scholar	Town	Others(Specify)...........	Housewife	Yes	1	I don't know	Free roaming all the time	Yes	Sometimes	Yes	No	No	No	No	Yes	No	No	Yes	No	No	No	No	Rabies	Yes	Yes	No	No	No	No	No	No	Yes	No	Yes	No	No	Yes	No	Dog	No	No
105	G105	2020-02-14	GMSS	9	A	15	Male	Day scholar	Town	Bussinessman	Housewife	Yes	3	Given by neighbour's/friends	Free roaming all the time	I don't know	I don't know	I don't know	No	No	No	No	No	Yes	Yes	Yes	No	No	No	No	Rabies	Yes	No	No	No	No	Yes	No	No	Yes	No	Yes	No	No	No	No	Dog	No	No
106	G106	2020-02-14	GMSS	9	A	13	Male	Day scholar	Village	Others(Specify)...........	Government employee	No							No	No	No	No	Yes	Yes	No	No	Yes	Yes	No	No	Rabies	Yes	Yes	No	Yes	Yes	No	Yes	No	No	No	No	No	No	No	Yes	I don't know	Yes	No
107	G107	2020-02-14	GMSS	9	C	14	Male	Day scholar	Town	Others(Specify)...........	Housewife	No							No	No	Yes	No	Yes	Yes	No	Yes	Yes	No	No	No	Rabies	Yes	No	No	Yes	No	Yes	Yes	No	No	No	Yes	Yes	Yes	Yes	No	Dog	No	No
108	G108	2020-02-14	GMSS	10	A	16	Female	Day scholar	Village	Farmer	Farmer	Yes	1	Purchased from other people in Bhutan	Keep inside the house compound all the time	Yes	Every year	Yes	No	No	No	No	Yes	Yes	No	Yes	Yes	No	No	No	Mange	Yes	Yes	Yes	No	Yes	No	No	No	Yes	No	No	No	No	No	No	Dog	No	No
109	G109	2020-02-14	GMSS	10	A	15	Female	Day scholar	Town	Government employee	Housewife	No							No	No	No	No	Yes	Yes	No	Yes	Yes	Yes	No	No	Rabies & mange	Yes	Yes	No	Yes	No	Yes	Yes	No	No	No	No	No	Yes	No	No	Dog	No	No
110	G110	2020-02-14	GMSS	10	A	14	Female	Day scholar	Town	Private/coorporate employee	Bussinesswomen	No							Yes	No	Yes	No	No	Yes	No	Yes	Yes	No	No	No	Rabies	Yes	Yes	No	No	No	No	No	No	No	No	Yes	No	No	No	No	Dog	Yes	No
111	G111	2020-02-14	GMSS	10	A	17	Male	Day scholar	Town	Others(Specify)...........	Bussinesswomen	Yes	2	Adopted from street	Keep inside the house compound all the time	Yes	Sometimes	Yes	No	Yes	No	No	Yes	Yes	No	Yes	No	No	No	No	Mange	Yes	No	No	Yes	No	No	No	No	No	No	Yes	No	Yes	Yes	No	Dog	Yes	No
112	G112	2020-02-14	GMSS	10	A	17	Female	Day scholar	Town	Government employee	Housewife	No							No	Yes	No	No	Yes	No	No	Yes	Yes	No	No	No	Rabies & mange	Yes	Yes	No	Yes	Yes	No	Yes	No	Yes	No	No	No	No	Yes	No	Dog	No	No
113	G113	2020-02-14	GMSS	10	A	15	Female	Day scholar	Town	Military (RBP,RBA,RBG)	Housewife	No							No	Yes	No	No	No	No	No	Yes	Yes	No	No	No	Rabies & mange	Yes	Yes	No	Yes	Yes	Yes	Yes	No	Yes	No	No	No	No	Yes	No	Dog	No	No
114	G114	2020-02-14	GMSS	10	B	16	Female	Day scholar	Village	Bussinessman	Housewife	Yes	2	Purchased from other people in Bhutan	Keep inside the house compound all the time	Yes	Every year	Yes	No	No	No	No	Yes	Yes	No	Yes	No	No	No	No	Rabies	Yes	Yes	No	Yes	No	Yes	No	No	Yes	No	No	No	No	No	No	Dog	Yes	No
115	G115	2020-02-14	GMSS	10	B	15	Female	Day scholar	Town	Military (RBP,RBA,RBG)	Housewife	No							No	No	No	No	Yes	No	No	Yes	Yes	No	No	No	Rabies	Yes	Yes	No	Yes	No	Yes	Yes	No	No	No	Yes	No	Yes	No	No	Dog	No	No
116	G116	2020-02-14	GMSS	10	B	18	Male	Day scholar	Village	Farmer	Farmer	Yes	1	I don't know	Let it roam freely outside during daytime	Yes	I don't know	No	No	No	No	No	No	Yes	Yes	Yes	Yes	No	No	No	Rabies	Yes	Yes	No	Yes	No	Yes	No	No	Yes	No	No	No	No	Yes	No	Dog	No	No
117	G117	2020-02-14	GMSS	10	B	14	Male	Day scholar	Village	Government employee	Housewife	No							No	No	No	No	Yes	No	No	Yes	No	No	No	No	Rabies	Yes	No	No	No	Yes	No	No	No	No	No	No	No	No	No	Yes	Dog	No	No
118	G118	2020-02-14	GMSS	10	B	16	Female	Day scholar	Village	Bussinessman	Housewife	Yes	3	Purchased from other people in Bhutan	Keep inside the house compound all the time	Yes	Every year	Yes	No	No	No	No	Yes	No	No	Yes	No	No	No	No	Rabies	Yes	No	Yes	No	No	No	No	No	Yes	No	No	No	No	No	No	Dog	No	No
119	G119	2020-02-14	GMSS	10	A	15	Female	Day scholar	Town	Government employee	Housewife	No							No	Yes	No	No	No	No	No	Yes	Yes	No	No	No	Rabies & mange	Yes	Yes	No	Yes	Yes	Yes	Yes	No	Yes	No	No	No	No	Yes	No	Dog	No	No
120	G120	2020-02-14	GMSS	10	B	16	Female	Day scholar	Town	Military (RBP,RBA,RBG)	Housewife	No							No	No	No	No	Yes	Yes	No	Yes	Yes	No	No	No	Rabies, mange, vomiting	Yes	Yes	No	Yes	Yes	Yes	No	No	No	No	Yes	No	No	No	No	Dog	No	No
121	G121	2020-02-14	GMSS	10	A	16	Female	Day scholar	Town	Private/coorporate employee	Housewife	No							No	Yes	No	No	Yes	Yes	No	Yes	Yes	No	No	No	Rabies & mange	Yes	Yes	No	Yes	No	Yes	No	No	Yes	No	Yes	No	Yes	Yes	No	Dog	No	No
122	G122	2020-02-14	GMSS	10	A	15	Female	Day scholar	Village	Farmer	Farmer	Yes	1	Given by neighbour's/friends	Keep inside the house compound all the time	I don't know	I don't know	No	No	No	Yes	Yes	Yes	Yes	No	Yes	Yes	No	No	No	Rabies & mange	Yes	No	Yes	Yes	Yes	No	No	No	No	No	Yes	No	Yes	No	No	Dog	No	No
123	G123	2020-02-14	GMSS	10	A	19	Male	Day scholar	Village	Farmer	Farmer	Yes	1	Given by neighbour's/friends	Free roaming all the time	No		No	No	Yes	No	No	Yes	No	No	Yes	Yes	Yes	No	No	Mange	Yes	Yes	No	No	Yes	Yes	No	No	No	No	Yes	No	Yes	Yes	No	Dog	No	No
124	G124	2020-02-14	GMSS	10	B	15	Female	Day scholar	Town	Military (RBP,RBA,RBG)	Housewife	No							No	No	No	No	Yes	Yes	No	Yes	No	No	No	No	Rabies,mange,vomiting	Yes	Yes	Yes	No	Yes	Yes	Yes	No	Yes	No	Yes	No	No	No	No	Dog	No	No
125	G125	2020-02-14	GMSS	10	A	16	Female	Day scholar	Town	Others(Specify)...........	Housewife	No							No	No	No	No	Yes	No	No	Yes	No	Yes	No	No	Mange	Yes	Yes	Yes	No	Yes	Yes	No	No	No	No	Yes	Yes	Yes	Yes	No	Dog	No	No
126	G126	2020-02-14	GMSS	10	B	17	Female	Day scholar	Town	Bussinessman	Bussinesswomen	No							No	No	No	No	Yes	No	No	Yes	Yes	Yes	No	No	Mange	Yes	Yes	No	Yes	No	No	No	No	No	No	No	No	No	No	Yes	Dog	No	No
127	G127	2020-02-14	GMSS	10	B	15	Female	Day scholar	Village	Others(Specify)...........	Bussinesswomen	No							No	No	No	No	Yes	No	No	Yes	No	No	No	No	Rabies & mange	Yes	No	No	No	Yes	No	No	No	Yes	No	No	No	No	No	No	Dog	No	No
128	G128	2020-02-14	GMSS	10	B	16	Female	Day scholar	Town	Government employee	Government employee	No							No	No	No	No	Yes	Yes	No	Yes	Yes	Yes	No	No	Mange	Yes	No	No	Yes	No	Yes	No	No	No	No	Yes	No	No	No	No	Dog	No	No
129	G129	2020-02-14	GMSS	10	B	16	Female	Day scholar	Town	Others(Specify)...........	Housewife	Yes	2	Given by neighbour's/friends	Free roaming all the time	Yes	Sometimes	No	No	No	No	No	Yes	No	No	Yes	No	No	No	No	Rabies	Yes	Yes	No	No	No	No	No	No	No	No	No	No	No	Yes	No	Dog	No	No
130	G130	2020-02-14	GMSS	10	B	17	Female	Day scholar	Village	Government employee	Housewife	Yes	1	Given by neighbour's/friends	Let it roam freely outside during daytime	Yes	Sometimes	No	No	Yes	No	No	No	No	No	Yes	Yes	No	No	No	Rabies	Yes	No	No	No	No	No	Yes	No	No	No	No	No	No	Yes	No	Dog	No	No
131	G131	2020-02-14	GMSS	10	B	16	Female	Day scholar	Village	Farmer	Farmer	Yes	1	Purchased from other people in Bhutan	Let it roam freely outside during daytime	Yes	I don't know	No	No	No	No	No	Yes	No	No	Yes	No	No	No	No	Mange	Yes	No	Yes	Yes	No	No	No	No	No	No	No	No	No	Yes	No	Dog	No	No
132	G132	2020-02-14	GMSS	10	A	19	Male	Day scholar	Village	Bussinessman	Housewife	Yes	2	Purchased from other people in Bhutan	Keep inside the house compound all the time	Yes	Every year	No	No	No	No	Yes	No	No	No	Yes	Yes	No	No	No	Rabies	Yes	No	No	No	No	Yes	No	No	Yes	No	No	Yes	No	Yes	No	Cat	No	No
133	G133	2020-02-14	GMSS	10	B	14	Female	Day scholar	Village	Government employee	Government employee	No							No	No	No	No	Yes	No	No	Yes	No	No	No	No	Mange	Yes	Yes	No	Yes	No	Yes	No	No	Yes	No	No	No	Yes	Yes	No	Dog	No	No
134	G134	2020-02-14	GMSS	10	B	17	Female	Day scholar	Village	Farmer	Farmer	Yes	1	I don't know	Let it roam freely outside during daytime	Yes	Every year	Yes	No	No	No	No	Yes	Yes	No	Yes	Yes	Yes	No	No	Rabies & mange	Yes	Yes	No	Yes	No	Yes	Yes	No	No	No	No	No	Yes	No	No	Dog	No	No
135	G135	2020-02-14	GMSS	10	B	17	Male	Day scholar	Village	Bussinessman	Bussinesswomen	Yes	1	I don't know	Free roaming all the time	I don't know	I don't know	Yes	No	No	No	No	Yes	No	No	Yes	No	No	No	No	Rabies & mange	Yes	No	No	Yes	No	No	No	No	No	No	No	No	No	No	Yes	Dog	Yes	No
136	G136	2020-02-14	GMSS	10	B	14	Female	Day scholar	Town	Bussinessman	Housewife	Yes	1	Given by neighbour's/friends	Keep inside the house compound all the time	Yes	Sometimes	No	No	No	No	Yes	Yes	Yes	No	Yes	Yes	No	No	No	Rabies,mange,vomiting	Yes	No	No	Yes	Yes	No	Yes	No	Yes	No	Yes	No	Yes	No	No	Dog	Yes	No
137	G137	2020-02-14	GMSS	10	A	15	Female	Day scholar	Village	Others(Specify)...........	Housewife	No							No	No	No	No	Yes	No	No	Yes	No	No	No	No	Rabies	Yes	Yes	No	No	Yes	No	Yes	No	No	No	No	No	Yes	No	No	Dog	No	No
138	G138	2020-02-14	GMSS	10	B	16	Male	Day scholar	Village	Others(Specify)...........	Housewife	No							No	Yes	No	No	Yes	Yes	No	Yes	Yes	No	No	No	Bite wound & rabies	Yes	Yes	No	Yes	Yes	Yes	Yes	No	Yes	No	Yes	No	Yes	No	No	Dog	No	No
139	G139	2020-02-14	GMSS	10	A	15	Male	Day scholar	Village	Government employee	Others(Specify)................	No							Yes	No	No	No	Yes	Yes	No	Yes	Yes	No	No	No	Rabies & mange	Yes	Yes	Yes	Yes	Yes	Yes	Yes	No	No	No	Yes	No	Yes	Yes	No	Dog	No	No
140	G140	2020-02-14	GMSS	10	A	18	Male	Day scholar	Village	Farmer	Farmer	No							No	Yes	No	No	Yes	Yes	No	Yes	Yes	No	No	No	Mange	Yes	Yes	Yes	Yes	Yes	Yes	Yes	No	No	No	Yes	No	Yes	No	No	Dog	No	No
141	G141	2020-02-14	GMSS	10	A	16	Male	Day scholar	Town	Government employee	Government employee	No							No	Yes	No	No	Yes	No	No	Yes	No	No	No	No	Rabies	Yes	Yes	No	No	No	Yes	No	No	Yes	Yes	Yes	No	Yes	No	No	Dog	No	No
142	G142	2020-02-14	GMSS	10	A	15	Male	Day scholar	Town	Bussinessman	Bussinesswomen	No							Yes	No	Yes	No	Yes	Yes	No	Yes	No	Yes	No	No	Rabies & mange	Yes	Yes	No	No	Yes	Yes	No	No	Yes	No	Yes	Yes	Yes	Yes	No	Dog	No	No
143	G143	2020-02-14	GMSS	10	A	16	Male	Day scholar	Town	Private/coorporate employee	Housewife	Yes	2	Given by neighbour's/friends	Free roaming all the time	No		I don't know	No	No	No	No	No	Yes	No	Yes	No	No	No	No	Rabies, papalysis of leg	Yes	Yes	No	No	No	No	No	No	No	No	No	No	No	No	Yes	Dog	No	No
144	G114	2020-02-14	GMSS	10	A	16	Male	Day scholar	Town	Others(Specify)...........	Housewife	Yes	1	Purchased from other people in Bhutan	Let it roam freely outside during daytime	Yes	Every year	No	No	Yes	No	No	Yes	No	No	Yes	No	No	No	No	Rabies & mange	Yes	Yes	Yes	Yes	No	No	Yes	No	Yes	No	Yes	Yes	No	No	No	Dog	No	No
145	G145	2020-02-14	GMSS	10	A	14	Male	Day scholar	Village	Bussinessman	Housewife	No							No	No	Yes	Yes	Yes	Yes	No	Yes	Yes	No	No	No	Rabies & mange	Yes	Yes	No	Yes	Yes	Yes	Yes	No	No	No	No	No	No	No	Yes	I don't know	No	No
146	G146	2020-02-14	GMSS	10	A	15	Male	Day scholar	Village	Private/coorporate employee	Housewife	No							No	No	No	No	Yes	Yes	No	Yes	No	No	No	No	Rabies	Yes	No	Yes	No	No	No	No	No	No	No	No	No	No	No	Yes	Dog	No	No
147	G147	2020-02-14	GMSS	10	A	16	Male	Day scholar	Town	Private/coorporate employee	Private/coorporate employee	Yes	1	Purchased from other people in Bhutan	Let it roam freely outside during daytime	I don't know	I don't know	No	No	No	No	No	Yes	Yes	No	Yes	No	No	No	No	Rabies	Yes	No	No	Yes	No	No	No	No	No	No	Yes	No	Yes	Yes	No	Dog	No	No
148	G148	2020-02-14	GMSS	10	A	17	Male	Day scholar	Town	Others(Specify)...........	Housewife	Yes	1	Given by neighbour's/friends	Keep inside the house compound all the time	No		Yes	No	No	No	No	Yes	Yes	No	Yes	No	No	No	No	Rabies	Yes	Yes	No	No	No	No	No	No	No	No	Yes	No	No	No	No	Dog	No	No
149	G149	2020-02-14	GMSS	10	A	16	Male	Day scholar	Town	Private/coorporate employee	Housewife	Yes	2	Given by neighbour's/friends	Let it roam freely outside during daytime	Yes	Sometimes	Yes	No	No	No	No	Yes	Yes	No	Yes	No	Yes	No	No	Rabies,Fever	Yes	Yes	No	Yes	No	No	Yes	No	No	No	Yes	No	Yes	Yes	No	Dog	Yes	No
150	G150	2020-02-14	GMSS	10	B	21	Male	Day scholar	Village	Bussinessman	Bussinesswomen	Yes	1	Adopted from street	Let it roam freely outside during daytime	Yes	Sometimes	No	No	No	Yes	No	Yes	Yes	No	No	Yes	No	No	No	Mange	Yes	Yes	No	Yes	Yes	Yes	No	No	No	No	No	No	No	Yes	No	Dog	Yes	Yes
151	G151	2020-02-14	GMSS	10	B	17	Female	Day scholar	Village	Bussinessman	Housewife	Yes	1	Given by neighbour's/friends	Free roaming all the time	Yes	Every year	No	No	No	No	No	No	Yes	No	Yes	No	No	No	No	Rabies & mange	Yes	No	Yes	Yes	Yes	No	No	No	No	No	Yes	No	Yes	No	No	Dog	No	No
152	G152	2020-02-14	GMSS	10	B	20	Female	Day scholar	Town	Farmer	Farmer	Yes	1	Given by neighbour's/friends	Let it roam freely outside during daytime	Yes	Sometimes	Yes	No	No	No	No	Yes	No	No	Yes	No	No	No	No	Mange	Yes	No	No	No	No	Yes	No	No	No	No	Yes	No	No	Yes	No	Dog	Yes	No
153	G153	2020-02-14	GMSS	10	B	16	Female	Day scholar	Town	Government employee	Housewife	No							No	No	No	No	Yes	Yes	No	Yes	Yes	No	No	No	Rabies & mange	Yes	Yes	No	No	Yes	Yes	Yes	No	No	Yes	Yes	No	Yes	Yes	No	Dog	No	No
154	G154	2020-02-14	GMSS	10	A	15	Female	Day scholar	Village	Farmer	Bussinesswomen	No							No	No	No	No	No	Yes	No	Yes	No	No	No	No	Rabies & mange	Yes	Yes	No	No	No	No	No	No	No	No	No	No	No	No	Yes	Dog	Yes	No
155	G155	2020-02-14	GMSS	10	A	15	Female	Day scholar	Town	Bussinessman	Others(Specify)................	No							No	No	No	No	Yes	No	No	Yes	No	No	No	No	Rabies & mange	Yes	No	No	Yes	No	No	No	No	No	No	No	No	No	No	Yes	Dog	No	No
156	G156	2020-02-14	GMSS	10	A	15	Female	Day scholar	Town	Bussinessman	Bussinesswomen	Yes	1	I don't know	Keep inside the house compound all the time	Yes	Every year	I don't know	No	No	No	No	Yes	No	No	Yes	No	No	No	No	Mange	No	No	No	No	No	No	No	No	No	No	No	No	No	No	No		No	No
157	G157	2020-02-14	GMSS	10	A	16	Male	Day scholar	Town	Military (RBP,RBA,RBG)	Housewife	No							Yes	Yes	Yes	No	Yes	Yes	No	Yes	No	Yes	No	No	Rabies & mange	Yes	No	No	Yes	No	No	No	No	No	No	Yes	Yes	Yes	No	No	Dog	No	No
158	G158	2020-02-14	GMSS	10	A	14	Female	Day scholar	Town	Bussinessman	Housewife	Yes	1	Given by neighbour's/friends	Keep inside the house compound all the time	Yes	Every year	Yes	No	No	No	No	Yes	Yes	No	Yes	Yes	No	No	No	Mange, rabies, vomiting	Yes	No	Yes	No	Yes	No	Yes	No	Yes	No	Yes	Yes	Yes	No	No	Dog	No	No
159	G159	2020-02-14	GMSS	10	B	15	Male	Day scholar	Village	Government employee	Housewife	No							No	No	No	No	Yes	Yes	No	Yes	No	No	No	No	Rabies & mange	Yes	No	No	No	Yes	No	No	No	No	No	Yes	No	Yes	Yes	No	Dog	No	No
160	G160		GMSS	10	B	16	Male	Day scholar	Town	Military (RBP,RBA,RBG)	Housewife	Yes	1	Purchased from other people in Bhutan	Keep inside the house compound all the time	Yes	Every year	Yes	No	No	No	Yes	Yes	No	No	Yes	No	No	No	No	Bacteria Bacteria	Yes	No	No	Yes	No	No	No	No	Yes	No	No	Yes	No	Yes	No	Dog	Yes	No
161	S161	2020-03-18	SMSS	8	B	13	Female	Day scholar	Town	Military (RBP,RBA,RBG)	Housewife	No							No	No	No	No	Yes	Yes	No	Yes	No	No	No	No	Rabies	Yes	No	No	Yes	No	No	No	No	No	No	Yes	No	No	No	No	Dog	No	No
162	S162	2020-02-14	SMSS	8	A	14	Male	Day scholar	Village	Farmer	Farmer	Yes	1	Given by neighbour's/friends	Let it roam freely outside during daytime	Yes	Every year	No	No	No	No	No	Yes	Yes	No	Yes	No	No	No	No	Rabies	Yes	No	No	No	No	Yes	No	No	No	No	Yes	No	No	No	No	Dog	No	No
163	S163	2020-02-14	SMSS	8	C	14	Male	Day scholar	Town	Military (RBP,RBA,RBG)	Housewife	No							No	Yes	No	No	No	Yes	No	Yes	Yes	No	No	No	Rabies	Yes	Yes	No	Yes	No	Yes	Yes	No	No	No	No	No	Yes	No	No	Dog	No	No
164	S164	2020-03-18	SMSS	8	B	14	Male	Day scholar	Town	Military (RBP,RBA,RBG)	Housewife	No							No	No	No	No	Yes	No	No	Yes	Yes	No	No	No	Rabies	Yes	Yes	No	Yes	No	Yes	No	No	No	No	Yes	No	Yes	No	No	Dog	No	No
165	S165	2020-03-18	SMSS	8	C	15	Male	Day scholar	Town	Military (RBP,RBA,RBG)	Housewife	Yes	1	Adopted from street	Let it roam freely outside during daytime	Yes	Every year	I don't know	Yes	No	No	No	No	Yes	No	Yes	No	No	No	No	Rabies	Yes	Yes	No	No	No	Yes	Yes	No	No	No	Yes	No	No	No	No	Dog	No	No
166	S166	2020-03-18	SMSS	8	B	14	Male	Day scholar	Town	Military (RBP,RBA,RBG)	Housewife	Yes	3	I don't know	Keep inside the house compound all the time	Yes	Every year	I don't know	No	Yes	No	No	No	Yes	No	Yes	Yes	No	No	No	Rabies	Yes	No	No	Yes	No	No	No	No	No	No	Yes	No	No	No	No	Dog	No	No
167	S167	2020-03-18	SMSS	8	C	15	Male	Day scholar	Village	Farmer	Farmer	No							No	Yes	No	No	No	Yes	No	Yes	Yes	No	No	No	Rabies	Yes	No	No	Yes	No	No	No	No	Yes	No	No	No	No	Yes	No	Dog	No	No
168	S168	2020-03-18	SMSS	8	A	13	Female	Day scholar	Village	Farmer	Farmer	Yes	1	Purchased from other people in Bhutan	Free roaming all the time	Yes	Sometimes	No	No	No	No	No	Yes	Yes	No	Yes	No	No	No	No	Rabies	Yes	Yes	No	No	No	No	No	No	No	No	No	No	Yes	No	No	Dog	No	No
169	S169	2020-03-18	SMSS	8	B	14	Female	Day scholar	Town	Government employee	Housewife	No							No	No	No	No	No	Yes	No	Yes	No	No	No	No	Rabies	Yes	No	No	No	No	Yes	No	No	No	No	No	No	No	Yes	No	Dog	No	No
170	S170	2020-03-18	SMSS	8	B	13	Female	Day scholar	Town	Military (RBP,RBA,RBG)	Housewife	No							No	No	No	No	Yes	No	No	Yes	No	No	No	No	Rabies	Yes	No	No	No	No	Yes	No	No	No	No	No	No	No	Yes	No	Dog	No	No
171	S171	2020-03-18	SMSS	8	C	18	Male	Day scholar	Village	Farmer	Farmer	No							No	No	No	Yes	Yes	No	No	Yes	Yes	No	No	No	Rabies	Yes	No	No	Yes	No	Yes	No	No	Yes	No	Yes	No	Yes	No	No	Dog	No	No
172	S172	2020-03-18	SMSS	8	B	16	Male	Day scholar	Town	Military (RBP,RBA,RBG)	Housewife	No							No	No	No	No	No	Yes	No	Yes	No	No	No	No	Rabies	Yes	No	No	No	No	No	No	Yes	Yes	No	Yes	No	No	No	No	Dog	No	No
173	S173	2020-03-18	SMSS	8	B	14	Male	Day scholar	Village	Farmer	Farmer	No							No	No	No	No	No	Yes	No	Yes	No	No	No	No	Rabies	Yes	Yes	No	No	Yes	Yes	No	No	No	No	No	No	No	No	Yes	I don't know	No	No
174	S174	2020-03-18	SMSS	8	C	13	Female	Day scholar	Town	Farmer	Farmer	No							No	No	No	No	No	Yes	No	Yes	No	No	No	No	Rabies	Yes	No	No	No	No	Yes	No	No	No	No	No	No	No	Yes	No	Dog	No	No
175	S175	2020-03-18	SMSS	8	C	15	Female	Day scholar	Town	Military (RBP,RBA,RBG)	Housewife	No							No	No	No	No	Yes	No	No	Yes	Yes	No	No	No	Rabies	Yes	No	No	Yes	Yes	No	No	No	No	Yes	No	No	No	No	No	Dog	No	No
176	S176	2020-03-18	SMSS	8	A	16	Female	Day scholar	Village	Farmer	Farmer	No							No	No	No	No	Yes	Yes	No	Yes	Yes	No	No	No	Rabies	Yes	Yes	No	Yes	Yes	Yes	Yes	No	Yes	No	Yes	Yes	Yes	Yes	No	Dog	No	No
177	S177	2020-03-18	SMSS	8	B	15	Female	Day scholar	Town	Military (RBP,RBA,RBG)	Housewife	No							No	No	No	No	Yes	No	No	Yes	Yes	No	No	No	Rabies	Yes	Yes	Yes	Yes	No	No	No	No	No	No	Yes	No	No	No	No	Dog	No	No
178	S178	2020-03-18	SMSS	8	C	15	Female	Day scholar	Village	Farmer	Farmer	No							No	No	No	No	Yes	Yes	No	Yes	Yes	No	No	No	Rabies	Yes	Yes	No	Yes	No	Yes	No	No	Yes	No	No	Yes	No	No	No	Dog	No	No
179	S179	2020-03-18	SMSS	8	B	14	Female	Day scholar	Village	Military (RBP,RBA,RBG)	Housewife	Yes	1	Given by neighbour's/friends	Keep inside the house compound all the time	Yes	Every year	No	No	No	No	No	Yes	Yes	No	Yes	Yes	No	No	No	Rabies	Yes	Yes	Yes	Yes	Yes	No	No	No	No	No	Yes	No	No	Yes	No	Dog	No	No
180	S180	2020-03-18	SMSS	8	C	12	Female	Day scholar	Village	Farmer	Farmer	No							No	No	No	No	Yes	Yes	No	Yes	Yes	No	No	No		Yes	Yes	No	Yes	No	Yes	No	No	Yes	No	Yes	No	No	No	No	Dog	No	No
181	S181	2020-03-18	SMSS	8	C	15	Female	Day scholar	Village	Farmer	Farmer	No							No	No	No	No	No	Yes	No	Yes	No	No	No	No	Rabies	Yes	Yes	No	Yes	No	No	No	No	No	No	Yes	No	Yes	No	No	Dog	No	No
182	S182	2020-03-18	SMSS	8	B	13	Female	Day scholar	Village	Farmer	Farmer	No							No	No	No	No	No	Yes	No	Yes	No	No	No	No	Rabies	Yes	Yes	No	Yes	No	Yes	No	No	No	No	Yes	No	No	No	No	Dog	No	No
183	S183	2020-03-18	SMSS	8	B	13	Female	Day scholar	Town	Military (RBP,RBA,RBG)	Housewife	No							No	No	Yes	Yes	Yes	Yes	No	Yes	No	Yes	No	No	Rabies	Yes	Yes	No	Yes	No	Yes	No	No	No	No	No	No	No	No	Yes	Dog	Yes	No
184	S184	2020-03-18	SMSS	8	A	16	Female	Day scholar	Town	Military (RBP,RBA,RBG)	Housewife	Yes	2	Adopted from street	Free roaming all the time	Yes	Every year	No	No	No	No	No	Yes	Yes	No	Yes	Yes	No	No	No	Rabies & mange	Yes	Yes	Yes	Yes	No	Yes	No	No	No	No	No	No	Yes	Yes	No	Dog	No	No
185	S185	2020-03-18	SMSS	8	C	16	Male	Day scholar	Village	Farmer	Farmer	No							No	No	No	No	No	Yes	No	Yes	Yes	No	No	No	Rabies	Yes	Yes	No	Yes	No	Yes	Yes	No	Yes	No	Yes	No	Yes	No	No	Dog	No	No
186	S186	2020-03-18	SMSS	8	B	14	Male	Day scholar	Town	Military (RBP,RBA,RBG)	Housewife	Yes	1	I don't know	Keep inside the house compound all the time	Yes	I don't know	No	No	No	No	No	No	Yes	No	Yes	Yes	No	No	No	Rabies	Yes	No	No	No	No	No	Yes	No	No	No	Yes	No	No	No	No	Dog	No	No
187	S187	2020-03-18	SMSS	8	B	13	Male	Day scholar	Town	Military (RBP,RBA,RBG)	Housewife	Yes	1	Purchased from other people in Bhutan	Keep inside the house compound all the time	Yes	Every year	No	No	No	No	No	No	Yes	No	Yes	No	No	No	No	Rabies	Yes	No	No	No	No	No	No	No	No	No	Yes	No	No	No	No	Dog	Yes	Yes
188	S188	2020-03-18	SMSS	8	C	15	Male	Day scholar	Town	Military (RBP,RBA,RBG)	Housewife	No							No	Yes	No	No	No	Yes	No	Yes	Yes	No	No	No	Rabies	Yes	Yes	No	Yes	No	Yes	Yes	No	No	No	No	No	Yes	Yes	No	Dog	No	No
189	S189	2020-03-18	SMSS	8	C	15	Male	Day scholar	Village	Military (RBP,RBA,RBG)	Housewife	No							No	Yes	No	No	No	Yes	No	Yes	No	No	No	No	Rabies	Yes	No	No	Yes	No	No	Yes	No	No	No	Yes	No	Yes	No	No	Dog	No	No
190	S190	2020-03-18	SMSS	8	A	12	Female	Day scholar	Town	Government employee	Government employee	No							No	No	No	No	Yes	Yes	No	Yes	No	No	No	No	Rabies	Yes	No	No	No	Yes	Yes	No	No	No	No	No	No	Yes	Yes	No	Dog	No	No
191	S191	2020-03-18	SMSS	8	A	14	Female	Day scholar	Village	Farmer	Farmer	No							No	No	No	No	Yes	Yes	No	Yes	No	No	No	No	Rabies	Yes	Yes	No	No	No	Yes	No	No	No	No	No	No	Yes	No	No	Dog	No	No
192	S192	2020-03-18	SMSS	8	B	14	Female	Day scholar	Town	Government employee	Housewife	No							No	Yes	No	No	No	No	No	Yes	Yes	No	No	No		Yes	No	No	No	No	Yes	No	No	No	No	Yes	No	Yes	No	No	Dog	Yes	No
193	S193	2020-03-18	SMSS	8	A	16	Male	Day scholar	Village	Private/coorporate employee	Housewife	Yes	2	Given by neighbour's/friends	Let it roam freely outside during daytime	Yes	Every year	Yes	No	Yes	No	No	Yes	No	No	Yes	No	No	No	No	Rabies	Yes	Yes	No	Yes	No	No	Yes	No	No	No	Yes	No	Yes	No	No	Dog	Yes	No
194	S194	2020-03-18	SMSS	8	C	15	Male	Day scholar	Town	Military (RBP,RBA,RBG)	Housewife	No							No	Yes	No	No	No	Yes	No	Yes	Yes	No	No	No	Rabies	Yes	Yes	No	Yes	No	Yes	Yes	No	No	No	No	No	Yes	Yes	No	Dog	No	No
195	S195	2020-03-18	SMSS	8	C	15	Male	Day scholar	Town	Government employee	Government employee	No							No	Yes	No	No	No	Yes	No	Yes	Yes	No	No	No	Rabies	Yes	Yes	No	Yes	No	Yes	No	No	No	No	No	No	Yes	Yes	No	Dog	No	No
196	S196	2020-03-18	SMSS	8	C	15	Male	Day scholar	Town	Military (RBP,RBA,RBG)	Housewife	No							No	Yes	No	No	No	Yes	No	Yes	Yes	No	No	No	Rabies	Yes	Yes	No	Yes	No	Yes	No	No	No	No	No	No	Yes	Yes	No	Dog	No	No
197	S197	2020-03-18	SMSS	8	A	15	Male	Day scholar	Town	Military (RBP,RBA,RBG)	Housewife	No							No	No	No	No	No	Yes	No	Yes	No	No	No	No	Rabies	Yes	Yes	No	No	No	No	No	No	No	No	Yes	No	No	No	No	Cow	No	No
198	S198	2020-03-18	SMSS	8	A	15	Female	Day scholar	Village	Others(Specify)...........	Housewife	Yes	1	I don't know	Keep inside the house compound all the time	Yes	I don't know	I don't know	No	No	No	No	Yes	Yes	Yes	Yes	No	No	No	Yes	i don;t know	Yes	Yes	Yes	Yes	Yes	Yes	Yes	No	Yes	No	Yes	No	Yes	Yes	No	Bat	Yes	No
199	S199	2020-03-18	SMSS	8	C	16	Female	Day scholar	Village	Farmer	Farmer	Yes	1	Given by neighbour's/friends	Free roaming all the time	Yes	I don't know	I don't know	No	No	No	No	Yes	Yes	No	Yes	Yes	No	No	No	i don;t know	Yes	Yes	Yes	Yes	Yes	Yes	Yes	No	Yes	Yes	No	No	Yes	No	No	Dog	Yes	No
200	S200	2020-03-18	SMSS	8	B	13	Female	Day scholar	Town	Military (RBP,RBA,RBG)	Housewife	No							No	No	No	No	Yes	Yes	No	Yes	No	No	No	No	Rabies	Yes	Yes	No	Yes	No	No	No	No	No	No	Yes	No	No	No	No	Dog	No	No
201	S201	2020-03-18	SMSS	8	A	13	Female	Day scholar	Town	Military (RBP,RBA,RBG)	Housewife	No							No	No	No	No	No	Yes	No	Yes	Yes	No	No	No	Rabies	Yes	Yes	No	No	No	Yes	No	No	No	No	Yes	No	Yes	No	No	Dog	Yes	No
202	S202	2020-03-18	SMSS	8	A	14	Female	Day scholar	Town	Military (RBP,RBA,RBG)	Housewife	No							No	No	No	No	Yes	Yes	No	Yes	No	No	No	No	Rabies	Yes	Yes	No	No	Yes	Yes	No	No	No	No	Yes	No	Yes	No	No	Dog	No	No
203	S203	2020-03-18	SMSS	8	A	14	Female	Day scholar	Village	Farmer	Farmer	Yes	1	Given by neighbour's/friends	Let it roam freely outside during daytime	I don't know	I don't know	No	No	No	No	No	Yes	Yes	No	Yes	Yes	Yes	No	No	Rabies	Yes	Yes	No	No	No	Yes	No	No	Yes	No	Yes	No	Yes	No	No	Dog	No	No
204	S204	2020-03-18	SMSS	8	A	16	Male	Day scholar	Village	Others(Specify)...........	Housewife	Yes	1	Adopted from street	Let it roam freely outside during daytime	Yes	Every year	Yes	No	Yes	No	No	Yes	No	No	Yes	No	No	No	No	Rabies	Yes	No	No	Yes	No	No	No	No	Yes	No	No	No	No	No	No	Dog	Yes	No
205	S205	2020-03-18	SMSS	8	A	15	Male	Day scholar	Town	Military (RBP,RBA,RBG)	Housewife	No							No	No	No	No	Yes	Yes	No	Yes	No	No	No	No	Rabies	Yes	No	No	No	No	Yes	Yes	No	No	No	Yes	No	No	No	No	Dog	No	No
206	S206	2020-03-18	SMSS	8	A	14	Male	Day scholar	Town	Military (RBP,RBA,RBG)	Housewife	No							No	No	No	No	Yes	Yes	No	Yes	No	No	No	No	Rabies	Yes	Yes	No	No	No	Yes	Yes	No	Yes	No	Yes	No	No	No	No	Dog	No	No
207	S207	2020-03-18	SMSS	8	A	14	Male	Day scholar	Town	Military (RBP,RBA,RBG)	Housewife	No							No	No	No	No	Yes	Yes	No	Yes	No	No	No	No	Rabies	Yes	Yes	No	No	No	Yes	Yes	No	No	No	Yes	No	No	No	No	Dog	No	No
208	S208	2020-03-18	SMSS	8	A	14	Male	Day scholar	Town	Government employee	Housewife	Yes	1	I don't know	Free roaming all the time	No		No	No	No	No	No	Yes	Yes	No	Yes	No	No	No	No	Rabies	Yes	Yes	No	No	No	Yes	Yes	No	No	No	Yes	No	No	No	No	Dog	No	No
209	S209	2020-03-18	SMSS	8	A	13	Male	Day scholar	Town	Others(Specify)...........	Housewife	No							No	No	No	No	Yes	Yes	No	Yes	No	No	No	No	Rabies	Yes	Yes	No	No	No	Yes	Yes	No	No	No	Yes	No	No	No	No	Dog	No	No
210	S210	2020-03-18	SMSS	8	A	14	Male	Day scholar	Village	Others(Specify)...........	Housewife	No							No	No	No	No	Yes	Yes	No	Yes	No	No	No	No	Rabies	Yes	Yes	No	No	No	Yes	Yes	No	No	No	Yes	No	No	No	No	Dog	No	No
211	S211	2020-03-18	SMSS	8	A	13	Male	Day scholar	Village	Military (RBP,RBA,RBG)	Housewife	No							No	No	No	No	Yes	Yes	No	Yes	No	No	No	No	Rabies	Yes	Yes	No	No	Yes	Yes	Yes	No	No	No	Yes	No	No	No	No	Dog	No	No
212	S212	2020-03-18	SMSS	8	C	16	Female	Day scholar	Village	Others(Specify)...........	Housewife	Yes	1	Adopted from street	Let it roam freely outside during daytime	Yes	Sometimes	I don't know	No	Yes	No	No	No	Yes	No	Yes	Yes	No	No	No	i don;t know	No	No	No	No	No	No	No	No	No	No	No	No	No	No	No		No	No
213	S213	2020-03-18	SMSS	8	B	14	Male	Day scholar	Town	Military (RBP,RBA,RBG)	Housewife	No							No	No	No	No	No	Yes	No	Yes	Yes	No	No	No	Rabies	Yes	Yes	No	Yes	Yes	Yes	No	No	No	No	No	No	No	No	Yes	Dog	No	No
214	S214	2020-03-18	SMSS	8	C	14	Male	Day scholar	Town	Private/coorporate employee	Private/coorporate employee	Yes	1	I don't know	Free roaming all the time	Yes	Every year	No	No	No	Yes	No	No	No	No	No	Yes	No	No	No	Rabies	Yes	Yes	No	No	No	No	No	No	No	No	Yes	No	No	No	No	Dog	No	No
215	S215	2020-03-18	SMSS	8	B	14	Male	Day scholar	Town	Farmer	Farmer	No							No	No	No	No	No	Yes	No	Yes	Yes	No	No	No	Rabies	Yes	No	No	No	No	No	Yes	No	No	No	Yes	No	No	No	No	Dog	No	No
216	S216	2020-03-18	SMSS	8	A	14	Male	Day scholar	Town	Military (RBP,RBA,RBG)	Housewife	No							No	No	No	No	Yes	Yes	No	Yes	No	No	No	No	Rabies	Yes	No	No	No	No	No	Yes	No	No	No	Yes	No	No	No	No	Dog	No	No
217	S217	2020-03-18	SMSS	8	A	15	Male	Day scholar	Town	Military (RBP,RBA,RBG)	Housewife	No							No	No	No	No	No	No	Yes	Yes	Yes	No	No	No	Rabies	Yes	No	No	Yes	No	Yes	No	No	Yes	No	Yes	No	Yes	No	No	Dog	No	No
218	S218	2020-03-18	SMSS	8	B	14	Male	Day scholar	Town	Military (RBP,RBA,RBG)	Housewife	No							No	No	No	No	Yes	No	Yes	Yes	Yes	No	No	No	Rabies	Yes	No	No	Yes	No	Yes	No	No	Yes	No	Yes	No	No	Yes	No	Dog	No	No
219	S219	2020-03-18	SMSS	8	C	15	Male	Day scholar	Village	Farmer	Farmer	Yes	2	I don't know	Let it roam freely outside during daytime	Yes	Sometimes	I don't know	No	No	No	Yes	Yes	Yes	No	Yes	Yes	No	No	No	Rabies	Yes	No	Yes	Yes	No	No	No	No	No	No	Yes	No	No	No	No	Dog	No	No
220	S220	2020-03-18	SMSS	8	B	14	Male	Day scholar	Town	Others(Specify)...........	Housewife	No							No	No	No	No	Yes	Yes	No	Yes	No	No	No	No	Rabies	Yes	No	No	Yes	No	Yes	Yes	No	No	No	No	No	No	Yes	No	I don't know	No	No
222	S222	2020-03-18	SMSS	8	B	15	Female	Day scholar	Town	Military (RBP,RBA,RBG)	Housewife	No							No	Yes	No	No	Yes	No	No	Yes	Yes	No	No	No		Yes	No	No	No	No	Yes	No	No	No	No	No	No	Yes	No	No	Dog	Yes	No
223	S223	2020-03-18	SMSS	8	B	14	Female	Day scholar	Village	Others(Specify)...........	Housewife	No							No	Yes	No	No	Yes	No	No	Yes	Yes	No	No	No		Yes	Yes	No	No	No	No	No	No	No	No	No	No	Yes	Yes	No	Dog	Yes	No
224	S224	2020-03-18	SMSS	8	C	12	Female	Day scholar	Village	Government employee	Private/coorporate employee	No							No	No	No	Yes	Yes	Yes	No	Yes	Yes	No	No	No	Rabies	Yes	No	No	No	No	No	No	Yes	No	No	Yes	No	No	No	No	Dog	Yes	No
225	S225	2020-03-18	SMSS	8	C	13	Female	Day scholar	Village	Government employee	Government employee	No							No	No	No	No	No	Yes	No	Yes	No	No	No	No	Rabies	Yes	No	No	Yes	No	No	No	No	No	No	Yes	No	Yes	No	No	Dog	Yes	No
226	S226	2020-03-18	SMSS	8	C	14	Female	Day scholar	Town	Military (RBP,RBA,RBG)	Housewife	No							No	No	No	No	No	Yes	No	Yes	Yes	No	No	No	Rabies	Yes	Yes	No	Yes	No	Yes	No	No	No	No	No	No	No	No	Yes	Dog	No	No
227	S227	2020-03-18	SMSS	10	C	17	Female	Day scholar	Village	Farmer	Farmer	No							No	No	No	No	No	Yes	No	Yes	No	No	No	No	Rabies & mange	Yes	No	No	No	Yes	No	No	No	No	Yes	No	No	No	No	No	Dog	No	No
228	S228	2020-03-18	SMSS	8	A	16	Female	Day scholar	Town	Military (RBP,RBA,RBG)	Housewife	No							No	No	No	No	Yes	Yes	No	Yes	No	No	No	No	Rabies & mange	Yes	Yes	No	Yes	Yes	Yes	No	No	No	No	No	No	Yes	Yes	No	Dog	No	Yes
229	S229	2020-03-18	SMSS	8	A	15	Female	Day scholar	Village	Others(Specify)...........	Housewife	Yes	1	Adopted from street	Let it roam freely outside during daytime	Yes	Sometimes	No	No	No	No	No	No	Yes	No	Yes	Yes	No	No	No		Yes	Yes	No	No	Yes	Yes	No	No	No	No	Yes	No	Yes	No	No	Dog	No	No
230	S230	2020-03-18	SMSS	8	A	14	Male	Day scholar	Town	Military (RBP,RBA,RBG)	Housewife	Yes	1	Given by neighbour's/friends	Keep inside the house compound all the time	Yes	I don't know	I don't know	Yes	No	No	No	Yes	No	Yes	Yes	Yes	No	No	No	Rabies	No	No	No	No	No	No	No	No	No	No	No	No	No	No	No		No	No
231	S231	2020-03-18	SMSS	8	B	14	Female	Day scholar	Town	Military (RBP,RBA,RBG)	Housewife	No							No	Yes	No	No	Yes	Yes	No	Yes	Yes	No	No	No		Yes	Yes	No	Yes	Yes	Yes	No	No	Yes	No	Yes	No	Yes	Yes	No	Dog	No	Yes
232	S232	2020-03-18	SMSS	8	A	17	Male	Day scholar	Village	Others(Specify)...........	Housewife	No							No	No	No	No	Yes	Yes	No	Yes	No	No	No	No	Rabies	Yes	No	No	Yes	No	Yes	No	No	No	No	Yes	No	Yes	No	No	Dog	No	No
233	S233	2020-03-18	SMSS	8	C	15	Female	Day scholar	Town	Others(Specify)...........	Housewife	No							No	No	No	No	Yes	Yes	No	Yes	Yes	No	No	No	Rabies	Yes	Yes	No	Yes	No	No	No	No	No	No	No	No	No	Yes	No	Dog	No	No
234	S234	2020-03-18	SMSS	8	A	16	Female	Day scholar	Town	Military (RBP,RBA,RBG)	Housewife	Yes	1	Given by neighbour's/friends	Keep inside the house compound all the time	No		I don't know	No	No	No	No	Yes	Yes	No	Yes	No	No	No	No	Rabies	Yes	Yes	No	No	No	Yes	No	No	No	No	No	No	No	Yes	No	Dog	No	No
235	S235	2020-03-18	SMSS	8	A	15	Female	Day scholar	Town	Others(Specify)...........	Others(Specify)................	No							No	No	No	No	Yes	Yes	No	Yes	Yes	No	No	No	Rabies	Yes	Yes	No	Yes	No	Yes	No	No	No	No	Yes	No	Yes	Yes	No	Cat	No	No
236	S236	2020-03-18	SMSS	8	B	15	Female	Day scholar	Town	Others(Specify)...........	Housewife	No							No	No	No	No	Yes	Yes	No	Yes	Yes	No	No	No	Rabies	Yes	Yes	No	Yes	No	No	No	No	No	No	No	No	No	No	Yes	Dog	No	No
237	S237	2020-03-18	SMSS	8	C	14	Female	Day scholar	Town	Military (RBP,RBA,RBG)	Housewife	No							No	No	Yes	No	Yes	Yes	No	Yes	No	No	No	No	Rabies	Yes	Yes	No	No	No	Yes	No	No	No	No	Yes	No	Yes	No	No	Dog	No	No
238	S238	2020-03-18	SMSS	8	C	15	Female	Day scholar	Village	Others(Specify)...........	Housewife	Yes	2	Given by neighbour's/friends	Let it roam freely outside during daytime	Yes	Sometimes	No	No	No	No	No	No	Yes	No	Yes	Yes	No	No	No		Yes	No	No	No	Yes	Yes	No	No	No	No	Yes	No	Yes	No	No	Dog	No	No
239	S239	2020-03-18	SMSS	8	C	15	Female	Day scholar	Town	Military (RBP,RBA,RBG)	Housewife	Yes	1	Given by neighbour's/friends	Let it roam freely outside during nighttime	Yes	Sometimes	Yes	No	No	No	No	Yes	Yes	No	Yes	No	No	No	No	Rabies	Yes	Yes	No	Yes	No	Yes	No	No	No	No	No	No	No	No	Yes	Dog	No	No
240	S240	2020-03-18	SMSS	8	C	15	Female	Day scholar	Village	Farmer	Farmer	Yes	1	I don't know	Free roaming all the time	No		I don't know	No	Yes	No	No	No	No	No	Yes	Yes	No	No	No	Rabies	Yes	Yes	No	Yes	No	Yes	No	No	No	No	No	No	No	No	Yes	Dog	No	No
241	S241	2020-03-18	SMSS	9	A	15	Male	Day scholar	Town	Military (RBP,RBA,RBG)	Housewife	No							No	No	No	No	Yes	No	No	Yes	No	No	No	No	Rabies	Yes	Yes	No	No	No	No	No	No	No	No	Yes	No	No	No	No	Dog	No	No
242	S242	2020-03-18	SMSS	9	A	15	Male	Day scholar	Town	Others(Specify)...........	Housewife	No							No	No	No	No	Yes	No	No	Yes	No	No	No	No		Yes	No	No	Yes	No	No	No	No	No	No	Yes	No	No	No	No	Dog	Yes	No
243	S243	2020-03-18	SMSS	9	B	15	Female	Day scholar	Village	Others(Specify)...........	Housewife	No							Yes	No	No	No	Yes	No	No	Yes	No	Yes	No	No	Rabies	Yes	Yes	No	Yes	No	Yes	No	No	Yes	No	No	No	Yes	Yes	No	Dog	No	No
244	S244	2020-03-18	SMSS	10	C	16	Female	Day scholar	Village	Farmer	Farmer	Yes	1	Given by neighbour's/friends	Let it roam freely outside during daytime	Yes	Every year	Yes	No	No	No	No	Yes	Yes	No	Yes	Yes	No	No	No	Rabies	Yes	Yes	No	Yes	Yes	Yes	Yes	No	Yes	No	No	Yes	Yes	Yes	No	Dog	No	No
245	S245	2020-03-18	SMSS	9	A	15	Female	Day scholar	Town	Military (RBP,RBA,RBG)	Housewife	No							No	No	No	No	Yes	No	No	Yes	Yes	No	No	No	Rabies	Yes	Yes	No	No	No	Yes	No	No	No	No	No	No	No	No	Yes	I don't know	No	No
246	S246	2020-03-18	SMSS	9	C	16	Female	Day scholar	Village	Farmer	Farmer	No							No	No	No	No	Yes	Yes	No	Yes	Yes	No	No	No		Yes	Yes	No	Yes	Yes	Yes	No	No	No	No	Yes	No	No	Yes	No	Dog	No	No
247	S247	2020-03-18	SMSS	9	C	17	Female	Day scholar	Village	Farmer	Farmer	No							No	No	No	No	Yes	Yes	No	Yes	Yes	Yes	No	No	Rabies	Yes	Yes	No	Yes	Yes	Yes	No	No	No	No	Yes	No	No	Yes	No	Dog	No	No
248	S248	2020-03-18	SMSS	9	B	17	Male	Day scholar	Town	Military (RBP,RBA,RBG)	Housewife	No							No	No	No	No	Yes	No	No	Yes	Yes	Yes	No	No	Rabies	Yes	Yes	Yes	Yes	Yes	Yes	Yes	No	Yes	Yes	No	No	Yes	Yes	No	Dog	No	No
249	S249	2020-03-18	SMSS	9	B	15	Male	Day scholar	Town	Military (RBP,RBA,RBG)	Housewife	No							No	No	No	No	Yes	Yes	No	Yes	No	No	No	No	Rabies	Yes	Yes	Yes	Yes	Yes	Yes	Yes	No	No	No	Yes	No	No	No	No	Dog	No	No
250	S250	2020-03-18	SMSS	9	A	15	Female	Day scholar	Town	Military (RBP,RBA,RBG)	Housewife	No							No	No	No	No	Yes	No	No	Yes	No	No	No	No		Yes	Yes	No	No	Yes	Yes	No	No	No	No	Yes	No	Yes	No	No	Dog	No	No
251	S251	2020-03-18	SMSS	9	A	15	Female	Day scholar	Town	Military (RBP,RBA,RBG)	Housewife	No							No	No	No	No	Yes	Yes	No	Yes	No	No	No	No		Yes	Yes	No	No	Yes	Yes	No	No	No	No	Yes	No	Yes	No	No	Dog	No	No
252	S252	2020-03-18	SMSS	9	B	15	Male	Day scholar	Town	Military (RBP,RBA,RBG)	Housewife	No							No	Yes	No	No	No	No	No	Yes	No	No	No	No	Rabies	Yes	Yes	Yes	Yes	Yes	Yes	Yes	No	Yes	Yes	Yes	Yes	Yes	Yes	No	Dog	Yes	Yes
253	S253	2020-03-18	SMSS	9	B	16	Female	Day scholar	Town	Military (RBP,RBA,RBG)	Housewife	No							No	Yes	No	No	Yes	Yes	No	Yes	Yes	No	No	No	Rabies	Yes	Yes	Yes	Yes	Yes	Yes	Yes	No	No	No	Yes	Yes	Yes	Yes	No	Dog	No	No
254	S254	2020-03-18	SMSS	9	B	15	Female	Day scholar	Town	Military (RBP,RBA,RBG)	Housewife	No							No	Yes	No	No	Yes	No	No	Yes	No	Yes	No	No		Yes	No	No	No	Yes	Yes	No	No	No	No	Yes	No	Yes	No	No	Dog	No	No
255	S255	2020-03-18	SMSS	9	A	15	Female	Day scholar	Town	Military (RBP,RBA,RBG)	Housewife	No							No	No	No	No	Yes	No	No	Yes	Yes	No	No	No	Rabies	Yes	Yes	No	No	No	Yes	Yes	No	No	No	No	No	No	No	Yes	I don't know	No	No
256	S256	2020-03-18	SMSS	9	C	16	Female	Day scholar	Village	Farmer	Farmer	No							No	No	No	No	No	Yes	No	Yes	Yes	No	No	No	Bite wound & rabies	Yes	Yes	No	Yes	No	Yes	No	No	Yes	No	Yes	No	Yes	Yes	No	Dog	No	No
257	S257	2020-03-18	SMSS	9	C	16	Female	Day scholar	Village	Farmer	Farmer	No							No	No	No	No	No	Yes	No	Yes	Yes	No	No	No	Bite wound & rabies	Yes	Yes	No	Yes	No	Yes	No	No	No	No	Yes	No	Yes	Yes	No	Dog	No	No
258	Sd258	2020-03-18	SMSS	9	A	14	Female	Day scholar	Town	Military (RBP,RBA,RBG)	Housewife	No							No	No	No	No	Yes	Yes	No	Yes	Yes	No	No	No	Rabies	Yes	Yes	No	Yes	No	Yes	No	No	No	No	Yes	Yes	No	No	No	Dog	No	No
259	S259	2020-03-18	SMSS	9	A	19	Female	Day scholar	Town	Military (RBP,RBA,RBG)	Military (RBA,RBP,RBG)	Yes	3	Given by neighbour's/friends	Keep inside the house compound all the time	Yes	Sometimes	No	No	No	No	No	Yes	Yes	No	Yes	Yes	No	No	No	Rabies	Yes	Yes	No	No	No	Yes	Yes	No	No	No	Yes	Yes	No	No	No	Dog	No	No
260	S260	2020-03-18	SMSS	9	C	15	Female	Day scholar	Town	Military (RBP,RBA,RBG)	Housewife	Yes	1	Given by neighbour's/friends	Let it roam freely outside during daytime	Yes	Sometimes	No	No	No	No	No	Yes	Yes	No	Yes	Yes	No	No	No	Rabies	Yes	Yes	Yes	No	Yes	Yes	No	No	No	No	Yes	Yes	Yes	Yes	No	Dog	Yes	No
261	S261	2020-03-18	SMSS	9	B	14	Male	Day scholar	Village	Farmer	Farmer	No							No	No	No	No	Yes	Yes	No	Yes	Yes	No	No	No		Yes	No	No	No	No	Yes	No	No	No	Yes	No	No	No	Yes	No	Dog	No	No
262	S262	2020-03-18	SMSS	9	B	15	Female	Day scholar	Town	Military (RBP,RBA,RBG)	Housewife	No							No	No	No	No	No	Yes	No	Yes	No	No	No	No	Rabies	Yes	No	No	No	No	Yes	No	No	No	No	No	No	No	Yes	No	Dog	No	No
263	S263	2020-03-18	SMSS	9	A	17	Female	Day scholar	Village	Farmer	Farmer	No							No	No	No	No	Yes	No	No	Yes	Yes	No	No	No	Rabies & mange	Yes	Yes	No	No	No	Yes	No	No	Yes	No	No	No	Yes	No	No	Dog	No	No
264	S264	2020-03-18	SMSS	9	C	18	Male	Day scholar	Village	Farmer	Farmer	Yes	1	Given by neighbour's/friends	Let it roam freely outside during nighttime	No		No	No	No	No	No	No	Yes	Yes	Yes	No	No	No	No	Rabies	Yes	Yes	No	No	No	No	No	No	No	No	No	No	Yes	No	No	Dog	No	No
265	S265	2020-03-18	SMSS	9	A	14	Male	Day scholar	Town	Military (RBP,RBA,RBG)	Bussinesswomen	No							No	No	No	No	Yes	No	No	Yes	No	No	No	No	Rabies	Yes	Yes	No	Yes	No	Yes	No	No	No	No	No	No	No	No	Yes	Bat	Yes	No
266	S266	2020-03-18	SMSS	9	B	15	Male	Day scholar	Town	Military (RBP,RBA,RBG)	Housewife	No							No	No	No	No	Yes	No	No	Yes	Yes	No	No	No	Rabies	Yes	Yes	No	Yes	No	Yes	No	No	No	No	No	No	No	No	Yes	Bat	Yes	No
267	S267	2020-03-18	SMSS	9	C	17	Male	Day scholar	Town	Others(Specify)...........	Others(Specify)................	No							No	Yes	No	No	Yes	Yes	No	Yes	No	No	No	No	Rabies	Yes	No	No	Yes	No	Yes	No	No	No	No	No	No	Yes	Yes	No	Dog	Yes	No
268	S268	2020-03-18	SMSS	9	A	19	Male	Day scholar	Village	Farmer	Farmer	Yes	1	Given by neighbour's/friends	Let it roam freely outside during daytime	Yes	Sometimes	No	No	Yes	No	Yes	No	Yes	No	Yes	Yes	No	No	No	Rabies	Yes	Yes	No	Yes	No	Yes	No	No	Yes	No	No	No	No	No	No	Dog	No	No
269	S269	2020-03-18	SMSS	9	A	16	Male	Day scholar	Town	Military (RBP,RBA,RBG)	Housewife	No							No	No	No	No	Yes	Yes	No	Yes	No	Yes	No	No	Rabies	Yes	Yes	No	Yes	Yes	Yes	Yes	No	No	No	Yes	No	No	No	No	Dog	No	No
270	S270	2020-03-18	SMSS	9	B	17	Male	Day scholar	Town	Military (RBP,RBA,RBG)	Housewife	No							No	Yes	No	Yes	Yes	No	No	Yes	Yes	No	No	No	Rabies	Yes	No	No	No	No	Yes	No	No	Yes	Yes	No	No	Yes	No	No	Dog	No	No
271	S271	2020-03-18	SMSS	9	B	16	Female	Day scholar	Town	Military (RBP,RBA,RBG)	Housewife	No							No	No	No	No	Yes	Yes	No	Yes	Yes	Yes	No	No	Mange	Yes	Yes	No	Yes	No	Yes	Yes	No	No	No	No	No	No	No	Yes	Dog	No	No
272	S272	2020-03-18	SMSS	9	B	16	Female	Day scholar	Town	Military (RBP,RBA,RBG)	Housewife	No							No	No	No	No	Yes	Yes	No	Yes	Yes	Yes	No	No	Mange	Yes	Yes	No	Yes	No	Yes	Yes	No	No	No	No	No	No	No	Yes	Dog	No	No
273	S273	2020-03-18	SMSS	9	A	15	Female	Day scholar	Town	Military (RBP,RBA,RBG)	Housewife	No							No	Yes	No	No	Yes	Yes	Yes	Yes	Yes	Yes	No	No	Rabies & mange	Yes	Yes	No	Yes	Yes	Yes	Yes	No	Yes	No	No	No	Yes	No	No	Dog	Yes	No
274	S274	2020-03-18	SMSS	9	A	16	Female	Day scholar	Town	Military (RBP,RBA,RBG)	Housewife	No							No	No	No	No	Yes	No	No	Yes	Yes	No	No	No	Rabies & mange	Yes	Yes	No	No	No	Yes	No	No	No	No	Yes	No	Yes	Yes	No	Dog	No	No
275	S275	2020-03-18	SMSS	9	C	14	Female	Day scholar	Town	Bussinessman	Housewife	No							Yes	Yes	Yes	Yes	Yes	Yes	No	Yes	Yes	Yes	No	No	Rabies	Yes	No	Yes	Yes	Yes	No	No	No	Yes	No	No	No	Yes	No	No	Dog	No	No
276	S276	2020-03-18	SMSS	9	A	15	Female	Day scholar	Town	Military (RBP,RBA,RBG)	Housewife	Yes	1	Adopted from street	Free roaming all the time	Yes	Every year	Yes	No	Yes	No	No	Yes	No	No	Yes	Yes	No	No	No	Rabies	Yes	Yes	Yes	Yes	Yes	No	Yes	No	Yes	No	Yes	Yes	No	No	No	Dog	Yes	No
277	S277	2020-03-18	SMSS	9	A	14	Female	Day scholar	Town	Government employee	Housewife	No							No	Yes	No	No	Yes	No	No	Yes	Yes	No	No	No	Rabies	Yes	Yes	Yes	Yes	Yes	Yes	Yes	No	Yes	No	Yes	Yes	No	No	No	Dog	Yes	No
278	S278	2020-03-18	SMSS	9	B	16	Female	Day scholar	Town	Military (RBP,RBA,RBG)	Housewife	No							Yes	No	Yes	No	Yes	Yes	No	Yes	Yes	Yes	No	No	Rabies	Yes	Yes	No	No	Yes	Yes	Yes	No	Yes	No	No	No	Yes	Yes	No	Dog	No	No
279	S279	2020-03-18	SMSS	9	B	16	Female	Day scholar	Town	Government employee	Housewife	Yes	1	I don't know	Let it roam freely outside during daytime	Yes	Every year	No	No	Yes	No	No	No	Yes	No	Yes	Yes	Yes	No	No	Rabies	Yes	Yes	Yes	Yes	Yes	Yes	Yes	No	No	Yes	Yes	No	Yes	Yes	No	Dog	Yes	No
280	S280	2020-03-18	SMSS	9	B	15	Female	Day scholar	Village	Farmer	Farmer	No							Yes	Yes	No	No	Yes	Yes	No	Yes	Yes	Yes	No	No	Rabies	Yes	Yes	No	Yes	Yes	Yes	Yes	No	No	No	Yes	No	Yes	Yes	No	Dog	No	No
281	S281	2020-03-18	SMSS	9	B	17	Female	Day scholar	Town	Military (RBP,RBA,RBG)	Housewife	Yes	1	Given by neighbour's/friends	Let it roam freely outside during daytime	Yes	Every year	No	No	No	No	No	Yes	Yes	No	Yes	Yes	No	No	No	cough	Yes	Yes	No	Yes	Yes	Yes	Yes	No	Yes	No	No	Yes	No	Yes	No	Bat	Yes	No
282	S282	2020-03-18	SMSS	9	C	15	Female	Day scholar	Town	Military (RBP,RBA,RBG)	Housewife	No							No	No	No	No	No	Yes	No	Yes	No	No	No	No	Rabies	Yes	Yes	No	Yes	Yes	Yes	No	No	Yes	No	Yes	No	No	No	No	Dog	No	No
283	S283	2020-03-18	SMSS	9	B	16	Female	Day scholar	Town	Military (RBP,RBA,RBG)	Housewife	Yes	1	Given by neighbour's/friends	Let it roam freely outside during daytime	Yes	Every year	Yes	No	No	No	No	Yes	Yes	No	Yes	Yes	No	No	No	Rabies	Yes	Yes	No	Yes	No	Yes	Yes	No	No	No	Yes	No	Yes	No	No	Dog	No	No
284	S284	2020-03-18	SMSS	9	B	16	Female	Day scholar	Town	Military (RBP,RBA,RBG)	Housewife	No							No	No	No	No	Yes	Yes	No	Yes	Yes	No	No	No	Rabies	Yes	Yes	No	No	Yes	Yes	Yes	No	No	No	Yes	No	Yes	No	No	Dog	No	No
285	S285	2020-03-18	SMSS	9	C	18	Female	Day scholar	Village	Farmer	Farmer	No							No	No	No	No	Yes	Yes	No	Yes	No	No	No	No	Rabies	Yes	No	No	Yes	Yes	Yes	Yes	No	No	No	Yes	Yes	Yes	No	No	Dog	No	No
286	S286	2020-03-18	SMSS	9	C	14	Female	Day scholar	Village	Others(Specify)...........	Bussinesswomen	No							No	No	No	No	Yes	Yes	No	Yes	No	No	No	No	Rabies	Yes	No	No	Yes	Yes	Yes	Yes	No	No	No	Yes	Yes	Yes	No	No	Dog	No	No
287	S287	2020-03-18	SMSS	9	C	16	Female	Day scholar	Village	Farmer	Farmer	No							No	No	No	No	Yes	Yes	No	Yes	Yes	No	No	No	Rabies	Yes	Yes	No	No	Yes	Yes	No	No	No	No	Yes	Yes	Yes	No	No	Dog	Yes	No
288	S288	2020-03-18	SMSS	9	C	14	Female	Day scholar	Village	Military (RBP,RBA,RBG)	Housewife	Yes	1	Given by neighbour's/friends	Let it roam freely outside during daytime	Yes	Every year	Yes	No	Yes	Yes	Yes	Yes	Yes	No	Yes	Yes	No	No	No	Rabies & mange	Yes	No	Yes	Yes	Yes	No	No	No	Yes	No	Yes	No	No	No	No	Dog	No	No
289	S289	2020-03-18	SMSS	9	C	15	Female	Day scholar	Village	Bussinessman	Housewife	No							Yes	Yes	Yes	Yes	Yes	Yes	No	Yes	Yes	No	No	No	Rabies	Yes	No	Yes	No	Yes	No	Yes	No	No	No	No	No	Yes	No	No	Dog	No	No
290	S290	2020-03-18	SMSS	9	B	13	Female	Day scholar	Town	Private/coorporate employee	Government employee	No							Yes	Yes	Yes	Yes	Yes	Yes	No	Yes	Yes	No	No	No	Rabies	Yes	No	Yes	No	Yes	No	Yes	No	Yes	No	No	No	Yes	No	No	Dog	No	No
291	S291	2020-03-18	SMSS	9	B	15	Female	Day scholar	Town	Military (RBP,RBA,RBG)	Housewife	Yes	1	Given by neighbour's/friends	Let it roam freely outside during daytime	Yes	Every year	No	No	No	No	No	Yes	Yes	No	Yes	Yes	No	No	No	rabies, cough	Yes	Yes	No	Yes	Yes	Yes	No	No	Yes	No	No	Yes	No	Yes	No	Bat	Yes	No
292	S292	2020-03-18	SMSS	9	C	15	Female	Day scholar	Village	Farmer	Farmer	Yes	1	Given by neighbour's/friends	Let it roam freely outside during daytime	I don't know	I don't know	No	No	No	No	No	Yes	Yes	No	Yes	Yes	No	No	No	Rabies	Yes	Yes	No	Yes	No	Yes	Yes	No	No	No	Yes	No	No	No	No	Dog	No	No
293	S293	2020-03-18	SMSS	9	B	15	Female	Day scholar	Town	Military (RBP,RBA,RBG)	Housewife	No							No	No	No	No	No	Yes	No	Yes	Yes	No	No	No	Rabies	Yes	Yes	No	Yes	Yes	Yes	Yes	No	No	No	Yes	No	No	No	No	Dog	No	No
294	S294	2020-03-18	SMSS	9	B	16	Female	Day scholar	Town	Military (RBP,RBA,RBG)	Housewife	No							No	No	No	No	Yes	Yes	No	Yes	Yes	No	No	No	Rabies	Yes	Yes	Yes	Yes	Yes	Yes	Yes	No	Yes	No	Yes	Yes	Yes	No	No	Dog	No	No
295	S295	2020-03-18	SMSS	9	C	16	Female	Day scholar	Village	Farmer	Farmer	Yes	1	Given by neighbour's/friends	Keep inside the house compound all the time	Yes	Every year	I don't know	Yes	No	No	No	Yes	No	No	Yes	No	Yes	No	No	Rabies	Yes	Yes	No	No	No	Yes	No	No	No	No	Yes	Yes	No	No	No	Dog	No	No
296	S296	2020-03-18	SMSS	9	A	16	Female	Day scholar	Village	Farmer	Farmer	No							Yes	No	No	Yes	Yes	Yes	No	Yes	Yes	Yes	No	No	Rabies	Yes	Yes	No	No	Yes	Yes	Yes	No	No	No	No	No	Yes	Yes	No	Dog	No	No
297	S297	2020-03-18	SMSS	9	B	16	Female	Day scholar	Town	Military (RBP,RBA,RBG)	Housewife	No							No	No	No	No	Yes	Yes	No	Yes	Yes	No	No	No	Rabies	Yes	No	No	No	Yes	Yes	No	No	No	No	Yes	Yes	No	No	No	Dog	No	No
298	S298	2020-03-18	SMSS	9	B	15	Female	Day scholar	Town	Private/coorporate employee	Housewife	No							No	No	No	No	Yes	Yes	No	Yes	Yes	No	No	No	Rabies	Yes	Yes	Yes	Yes	Yes	Yes	Yes	No	Yes	No	Yes	Yes	Yes	No	No	Dog	No	No
299	S299	2020-03-18	SMSS	9	A	14	Female	Day scholar	Town	Military (RBP,RBA,RBG)	Housewife	No							No	No	No	No	Yes	Yes	No	Yes	Yes	No	No	No	Rabies	Yes	Yes	Yes	Yes	Yes	Yes	Yes	No	Yes	No	Yes	No	Yes	No	No	Dog	No	No
300	S300	2020-03-18	SMSS	9	A	15	Female	Day scholar	Town	Bussinessman	Bussinesswomen	No							No	No	No	No	No	Yes	Yes	Yes	Yes	No	No	No	Rabies	Yes	Yes	Yes	Yes	Yes	Yes	Yes	No	Yes	No	Yes	No	Yes	No	No	Dog	No	No
301	S301	2020-03-18	SMSS	9	A	15	Female	Day scholar	Town	Military (RBP,RBA,RBG)	Housewife	No							No	Yes	No	Yes	Yes	No	No	Yes	Yes	No	No	No	Rabies	Yes	Yes	No	Yes	No	Yes	No	No	No	No	Yes	No	No	Yes	No	Dog	Yes	No
302	S302	2020-03-18	SMSS	9	A	17	Female	Day scholar	Village	Farmer	Farmer	No							No	Yes	No	Yes	Yes	No	No	Yes	Yes	No	No	No	Rabies	Yes	Yes	No	Yes	Yes	No	No	No	No	No	Yes	No	No	Yes	No	Dog	No	No
303	S303	2020-03-18	SMSS	9	A	16	Female	Day scholar	Village	Farmer	Farmer	No							Yes	No	No	Yes	Yes	Yes	No	Yes	Yes	Yes	No	No	Rabies	Yes	Yes	No	Yes	Yes	Yes	No	No	No	No	No	No	Yes	Yes	No	Dog	No	No
304	S304	2020-03-18	SMSS	9	A	15	Female	Day scholar	Town	Government employee	Bussinesswomen	No							Yes	No	No	Yes	Yes	Yes	No	Yes	Yes	No	No	No	Rabies	Yes	Yes	No	No	Yes	Yes	Yes	No	No	No	No	No	Yes	Yes	No	Dog	No	No
305	S305	2020-03-18	SMSS	9	C	15	Female	Day scholar	Town	Bussinessman	Housewife	Yes	1	Given by neighbour's/friends	Keep inside the house compound all the time	Yes	Every year	No	No	No	No	No	Yes	No	No	Yes	Yes	No	No	No	Rabies	Yes	No	No	No	No	Yes	No	No	No	No	Yes	Yes	No	No	No	Dog	No	No
306	S306	2020-03-18	SMSS	9	C	17	Male	Day scholar	Town	Others(Specify)...........	Others(Specify)................	No							No	No	No	No	Yes	No	No	Yes	No	No	No	No	Rabies	Yes	Yes	No	No	No	Yes	No	No	No	No	No	No	Yes	Yes	No	Dog	No	No
307	S307	2020-03-18	SMSS	9	C	14	Male	Day scholar	Town	Military (RBP,RBA,RBG)	Government employee	No							No	No	No	No	Yes	No	No	Yes	No	No	No	No	Rabies	Yes	Yes	No	No	No	No	No	No	No	No	No	No	No	No	Yes	Dog	No	No
308	S308	2020-03-18	SMSS	9	C	15	Male	Day scholar	Village	Military (RBP,RBA,RBG)	Housewife	No							No	No	No	Yes	Yes	No	No	Yes	Yes	No	No	No	Rabies	Yes	Yes	No	No	No	Yes	Yes	No	Yes	No	Yes	Yes	No	No	No	Dog	No	No
309	S309	2020-03-18	SMSS	9	B	15	Male	Day scholar	Village	Others(Specify)...........	Housewife	No							No	Yes	No	No	Yes	Yes	No	Yes	Yes	No	No	No	Rabies	Yes	Yes	No	Yes	Yes	Yes	Yes	No	No	No	Yes	Yes	Yes	No	No	Dog	No	No
310	S310	2020-03-18	SMSS	9	B	16	Male	Day scholar	Town	Military (RBP,RBA,RBG)	Housewife	No							No	No	No	No	Yes	Yes	No	Yes	Yes	No	No	No	Rabies	Yes	No	No	No	No	Yes	No	No	Yes	No	No	No	No	No	No	Dog	No	No
311	S311	2020-03-18	SMSS	9	B	14	Female	Day scholar	Town	Military (RBP,RBA,RBG)	Housewife	No							No	No	No	No	Yes	No	No	Yes	No	Yes	No	No	Rabies	Yes	Yes	Yes	No	Yes	No	No	No	No	No	No	Yes	Yes	No	No	Dog	No	No
312	S312	2020-03-18	SMSS	9	C	14	Female	Day scholar	Town	Military (RBP,RBA,RBG)	Housewife	Yes	3	Given by neighbour's/friends	Let it roam freely outside during daytime	Yes	Sometimes	No	No	No	No	No	Yes	No	No	Yes	No	Yes	No	No	Rabies	Yes	Yes	Yes	No	Yes	No	No	No	No	No	No	Yes	Yes	No	No	Dog	No	No
313	S313	2020-03-18	SMSS	9	B	15	Female	Day scholar	Village	Military (RBP,RBA,RBG)	Housewife	Yes	1	Adopted from street	Let it roam freely outside during daytime	No		No	No	No	No	No	Yes	Yes	No	Yes	Yes	No	No	No	Rabies	Yes	Yes	No	Yes	Yes	Yes	Yes	No	Yes	No	Yes	No	No	No	No	Dog	No	No
314	S314	2020-03-18	SMSS	9	C	14	Female	Day scholar	Town	Others(Specify)...........	Housewife	No							Yes	No	No	No	Yes	No	No	Yes	No	Yes	No	No	Rabies	Yes	Yes	No	No	Yes	Yes	No	No	No	No	Yes	No	Yes	No	No	Dog	No	No
315	S315	2020-03-18	SMSS	9	B	15	Female	Day scholar	Village	Farmer	Farmer	No							No	No	No	No	Yes	Yes	No	Yes	Yes	Yes	No	No	Rabies	Yes	No	No	Yes	Yes	Yes	No	No	No	Yes	Yes	No	Yes	No	No	Dog	Yes	No
316	S316	2020-03-18	SMSS	9	A	15	Male	Day scholar	Village	Farmer	Farmer	No							No	No	No	No	Yes	No	No	Yes	Yes	No	No	No	Rabies	Yes	Yes	Yes	Yes	Yes	Yes	No	No	No	No	Yes	No	Yes	No	No	Bat	No	No
317	S317	2020-03-18	SMSS	9	C	15	Male	Day scholar	Town	Military (RBP,RBA,RBG)	Housewife	Yes	1	Purchased from other people in Bhutan	Let it roam freely outside during daytime	Yes	Every year	Yes	No	No	No	No	Yes	No	No	Yes	No	No	No	No	Rabies	Yes	Yes	No	No	No	No	No	No	No	No	No	No	No	Yes	No	Dog	Yes	No
318	S318	2020-03-18	SMSS	9	A	17	Male	Day scholar	Town	Military (RBP,RBA,RBG)	Housewife	Yes	1	Adopted from street	Let it roam freely outside during daytime	Yes	Sometimes	No	No	No	No	No	Yes	No	No	Yes	Yes	No	No	No	Rabies	Yes	Yes	No	Yes	No	Yes	No	No	No	No	No	No	No	No	Yes	Bat	Yes	No
319	S319	2020-03-18	SMSS	9	A	17	Male	Day scholar	Village	Farmer	Farmer	Yes	1	Given by neighbour's/friends	Keep inside the house compound all the time	Yes	Every year	Yes	No	No	No	No	No	Yes	No	Yes	No	No	No	No	Rabies	Yes	Yes	Yes	No	No	Yes	No	No	No	No	Yes	No	No	No	No	Dog	No	No
320	S320	2020-03-18	SMSS	9	C	16	Male	Day scholar	Village	Government employee	Housewife	No							No	No	No	Yes	Yes	Yes	No	Yes	Yes	No	No	No		Yes	Yes	Yes	Yes	Yes	Yes	Yes	No	No	No	Yes	No	Yes	Yes	No	Dog	No	No
321	S321	2020-03-18	SMSS	9	C	14	Male	Day scholar	Town	Government employee	Housewife	No							No	No	No	No	Yes	Yes	No	Yes	Yes	No	No	No	Rabies	Yes	Yes	Yes	No	Yes	Yes	No	No	No	No	Yes	Yes	Yes	Yes	No	Dog	No	No
322	S322	2020-03-18	SMSS	9	C	15	Male	Day scholar	Town	Military (RBP,RBA,RBG)	Housewife	No							No	No	No	No	Yes	Yes	No	Yes	Yes	No	No	No		Yes	No	No	No	Yes	Yes	No	No	No	No	Yes	Yes	No	No	No	Bat	Yes	No
323	S323	2020-03-18	SMSS	9	C	16	Male	Day scholar	Village	Farmer	Farmer	Yes	4	Adopted from street	Free roaming all the time	Yes	Every year	Yes	No	Yes	No	No	Yes	Yes	No	Yes	No	No	No	No	Rabies	Yes	Yes	Yes	No	Yes	Yes	No	No	No	Yes	Yes	No	No	Yes	No	Dog	No	No
324	S324	2020-03-18	SMSS	9	A	15	Male	Day scholar	Village	Farmer	Farmer	No							No	Yes	No	No	Yes	Yes	No	Yes	Yes	No	No	No	Rabies	Yes	Yes	No	No	Yes	Yes	No	No	No	No	Yes	Yes	No	Yes	No	Dog	No	No
325	S325	2020-03-18	SMSS	9	C	15	Male	Day scholar	Town	Bussinessman	Housewife	No							No	No	No	No	Yes	No	No	Yes	Yes	No	No	No	Rabies	Yes	Yes	Yes	Yes	Yes	Yes	No	No	No	No	Yes	No	Yes	No	No	Bat	Yes	No
326	S326	2020-03-18	SMSS	9	A	16	Male	Day scholar	Village	Bussinessman	Housewife	No							No	No	No	No	No	Yes	No	Yes	Yes	No	No	No	Rabies	Yes	Yes	Yes	Yes	Yes	Yes	Yes	No	No	No	Yes	No	No	No	No	Dog	No	No
327	S327	2020-03-18	SMSS	9	B	15	Male	Day scholar	Town	Military (RBP,RBA,RBG)	Housewife	Yes	2	Given by neighbour's/friends	Keep inside the house compound all the time	Yes	Sometimes	Yes	No	No	No	No	No	Yes	Yes	Yes	Yes	No	No	No	Rabies	Yes	Yes	No	Yes	No	Yes	No	No	No	No	Yes	No	No	No	No	Dog	No	No
328	S328	2020-03-18	SMSS	9	B	15	Male	Day scholar	Town	Military (RBP,RBA,RBG)	Housewife	No							No	No	No	No	No	Yes	Yes	Yes	Yes	No	No	No	Rabies	Yes	Yes	No	Yes	No	Yes	No	No	No	No	Yes	No	No	No	No	Dog	No	No
329	S329	2020-03-18	SMSS	9	A	15	Male	Day scholar	Village	Government employee	Housewife	Yes	1	Given by neighbour's/friends	Keep inside the house compound all the time	Yes	Every year	Yes	No	No	No	No	No	Yes	No	Yes	No	No	No	No	rabies, starving, accident	Yes	Yes	Yes	No	No	No	Yes	No	No	No	Yes	No	Yes	No	No	Dog	Yes	No
330	S330	2020-03-18	SMSS	9	A	14	Male	Day scholar	Town	Military (RBP,RBA,RBG)	Housewife	No							No	Yes	No	No	No	Yes	Yes	Yes	Yes	No	No	No	Rabies	Yes	Yes	No	Yes	No	No	No	No	No	No	Yes	No	No	No	No	Dog	No	No
331	S331	2020-03-18	SMSS	9	B	15	Male	Day scholar	Town	Military (RBP,RBA,RBG)	Housewife	No							No	No	No	No	No	Yes	Yes	Yes	Yes	No	No	No	Rabies	Yes	No	No	Yes	No	No	No	No	No	No	Yes	No	No	No	No	Bat	Yes	No
332	S332	2020-03-18	SMSS	9	B	15	Male	Day scholar	Village	Private/coorporate employee	Housewife	No							No	No	No	No	No	Yes	No	Yes	Yes	No	No	No	Rabies	Yes	Yes	No	No	No	No	No	No	No	No	Yes	No	No	No	No	Dog	Yes	No
333	S333	2020-03-18	SMSS	9	A	15	Male	Day scholar	Town	Military (RBP,RBA,RBG)	Housewife	No							No	No	No	No	Yes	No	No	Yes	No	No	No	No	Rabies	Yes	Yes	No	No	No	No	No	No	No	No	Yes	No	No	No	No	Dog	No	No
334	S334	2020-03-18	SMSS	10	A	18	Male	Day scholar	Town	Military (RBP,RBA,RBG)	Housewife	No							No	No	No	No	No	Yes	No	Yes	No	No	No	No	Rabies	Yes	Yes	No	Yes	No	Yes	No	No	Yes	No	No	No	No	Yes	No	Dog	No	No
335	S335v		SMSS	10	C	16	Male	Day scholar	Village	Private/coorporate employee	Housewife	No							Yes	No	No	Yes	Yes	Yes	No	Yes	Yes	Yes	No	No	Rabies, ringworm	Yes	Yes	Yes	Yes	Yes	Yes	Yes	No	No	No	Yes	No	No	No	No	Dog	Yes	No
336	S336	2020-03-18	SMSS	10	B	15	Male	Day scholar	Town	Military (RBP,RBA,RBG)	Housewife	Yes	1						No	No	No	Yes	Yes	Yes	Yes	Yes	Yes	Yes	No	No	Rabies	Yes	Yes	Yes	No	No	No	No	No	Yes	No	No	No	No	Yes	No	Bat	Yes	No
337	S337	2020-03-18	SMSS	10	C	16	Male	Day scholar	Village	Private/coorporate employee	Housewife	No							No	No	No	Yes	Yes	Yes	No	Yes	Yes	Yes	No	No	Rabies & mange	Yes	Yes	Yes	Yes	Yes	Yes	Yes	No	Yes	No	Yes	No	No	No	No	Dog	Yes	No
338	S338	2020-03-18	SMSS	10	B	17	Male	Day scholar	Town	Others(Specify)...........	Housewife	No							No	No	No	No	Yes	Yes	No	Yes	No	Yes	No	No	Rabies	Yes	No	No	No	No	No	No	Yes	No	No	Yes	No	No	No	No	Dog	No	No
339	S339	2020-03-18	SMSS	10	C	16	Female	Day scholar	Town	Military (RBP,RBA,RBG)	Housewife	No							No	No	Yes	No	Yes	Yes	No	Yes	Yes	No	No	No	Rabies & mange	Yes	Yes	Yes	Yes	Yes	Yes	Yes	No	Yes	No	Yes	No	Yes	Yes	No	I don't know	No	No
340	S340	2020-03-18	SMSS	10	C	16	Female	Day scholar	Town	Government employee	Housewife	Yes	2	Given by neighbour's/friends	Free roaming all the time	Yes	Sometimes	I don't know	No	No	No	No	Yes	Yes	No	Yes	Yes	No	No	No	Rabies & mange	Yes	Yes	Yes	Yes	Yes	Yes	Yes	No	Yes	No	Yes	No	No	Yes	No	I don't know	No	No
341	S341	2020-03-18	SMSS	10	A	16	Female	Day scholar	Village	Farmer	Farmer	No							No	Yes	No	No	Yes	Yes	No	Yes	Yes	Yes	No	No	Rabies, TVT	Yes	Yes	Yes	Yes	Yes	Yes	Yes	No	Yes	No	Yes	No	No	Yes	No	Dog	No	No
342	S342	2020-03-18	SMSS	10	B	17	Female	Day scholar	Town	Military (RBP,RBA,RBG)	Housewife	No							No	Yes	No	No	Yes	Yes	No	Yes	Yes	Yes	No	No	Rabies, TVT	Yes	Yes	Yes	Yes	Yes	Yes	Yes	No	Yes	No	Yes	No	No	Yes	No	Dog	No	No
343	S343	2020-03-18	SMSS	10	C	16	Female	Day scholar	Village	Farmer	Farmer	No							No	Yes	Yes	Yes	Yes	No	No	Yes	Yes	No	No	No	Rabies	Yes	Yes	Yes	No	No	Yes	Yes	No	Yes	No	Yes	No	No	Yes	No	Dog	No	No
344	S344	2020-03-18	SMSS	10	C	16	Female	Day scholar	Village	Farmer	Farmer	No							No	Yes	Yes	Yes	Yes	No	No	Yes	Yes	No	No	No	Rabies	Yes	Yes	Yes	No	No	Yes	No	No	Yes	No	Yes	No	No	Yes	No	Dog	No	No
345	S345	2020-03-18	SMSS	10	B	16	Female	Day scholar	Town	Military (RBP,RBA,RBG)	Housewife	No							No	Yes	No	Yes	Yes	Yes	No	Yes	Yes	No	No	No	Rabies	Yes	Yes	No	Yes	No	Yes	No	No	Yes	No	Yes	No	Yes	Yes	No	Dog	No	No
346	S346	2020-03-18	SMSS	10	C	16	Female	Day scholar	Village	Farmer	Farmer	No							No	No	No	No	Yes	No	No	Yes	Yes	No	No	No	Rabies & mange	Yes	Yes	No	No	No	Yes	Yes	No	No	No	Yes	No	Yes	Yes	No	Dog	No	No
347	S347	2020-03-18	SMSS	10	B	17	Female	Day scholar	Village	Farmer	Farmer	No							No	No	No	No	Yes	No	No	Yes	Yes	No	No	No	Mange	Yes	No	No	No	No	Yes	No	No	Yes	No	Yes	No	Yes	Yes	No	Dog	No	No
348	S348	2020-03-18	SMSS	10	B	16	Male	Day scholar	Town	Military (RBP,RBA,RBG)	Housewife	Yes	2	Adopted from street	Free roaming all the time	I don't know	I don't know	I don't know	Yes	No	No	Yes	Yes	Yes	No	Yes	Yes	No	No	No	Rabies	Yes	Yes	Yes	Yes	Yes	Yes	No	No	No	No	No	No	No	Yes	No	Dog	No	No
349	S349	2020-03-18	SMSS	10	B	16	Male	Day scholar	Town	Military (RBP,RBA,RBG)	Housewife	No							No	No	No	No	No	Yes	No	Yes	No	No	No	No	Rabies & mange	Yes	Yes	No	No	No	No	No	No	No	No	No	No	No	Yes	No	Dog	No	No
350	S350	2020-03-18	SMSS	10	A	18	Male	Day scholar	Village	Farmer	Farmer	No							No	Yes	No	No	No	Yes	No	Yes	No	No	No	Yes	rabies. TVT	Yes	Yes	No	No	No	Yes	No	No	No	No	Yes	No	No	No	No	Dog	No	No
351	S351	2020-03-18	SMSS	10	C	20	Male	Day scholar	Town	Military (RBP,RBA,RBG)	Housewife	No							No	No	No	No	No	Yes	No	Yes	No	No	No	No	Rabies	Yes	No	No	Yes	No	No	No	No	No	No	No	No	Yes	No	No	Dog	No	No
352	S352	2020-03-18	SMSS	10	B	14	Male	Day scholar	Town	Military (RBP,RBA,RBG)	Housewife	No							No	No	No	No	Yes	Yes	No	Yes	No	Yes	No	No	Rabies	Yes	Yes	Yes	Yes	Yes	Yes	Yes	No	No	No	No	No	No	Yes	No	Dog	No	No
353	S353	2020-03-18	SMSS	9	A	15	Female	Day scholar	Village	Farmer	Farmer	Yes	2	Adopted from street	Let it roam freely outside during daytime	Yes	Sometimes	Yes	No	No	No	No	Yes	Yes	No	Yes	Yes	No	No	No	Rabies, distemper	Yes	Yes	Yes	Yes	Yes	Yes	Yes	No	No	No	No	No	No	Yes	No	Dog	No	No
354	S354	2020-03-18	SMSS	10	A	15	Female	Day scholar	Village	Farmer	Farmer	No							No	No	No	No	Yes	No	No	Yes	Yes	No	No	No	Rabies	Yes	Yes	Yes	Yes	Yes	Yes	Yes	No	No	No	Yes	No	No	Yes	No	Dog	No	No
355	S355	2020-03-18	SMSS	10	C	16	Female	Day scholar	Village	Farmer	Farmer	No							No	No	No	No	Yes	No	No	Yes	Yes	No	No	No	Rabies & mange	Yes	Yes	No	No	No	Yes	No	No	Yes	No	No	No	Yes	No	No	Dog	No	No
356	S356	2020-03-18	SMSS	10	A	15	Female	Day scholar	Village	Farmer	Farmer	Yes	1	Adopted from street	Free roaming all the time	Yes	Every year	Yes	No	No	No	No	Yes	Yes	No	Yes	Yes	No	No	No	Rabies & mange	Yes	Yes	Yes	Yes	No	Yes	No	No	No	No	Yes	Yes	Yes	Yes	No	Dog	No	No
357	S357	2020-03-18	SMSS	10	A	20	Female	Day scholar	Village	Farmer	Farmer	No							No	No	No	No	Yes	Yes	No	Yes	Yes	Yes	No	No	Rabies	Yes	Yes	Yes	Yes	No	Yes	No	No	No	No	No	No	Yes	No	No	Dog	No	No
358	S358	2020-03-18	SMSS	10	C	17	Female	Day scholar	Village	Farmer	Farmer	No							No	No	No	No	Yes	Yes	No	Yes	Yes	Yes	No	No	Rabies & mange	Yes	Yes	No	Yes	No	Yes	No	No	No	No	No	No	Yes	Yes	No	Dog	No	No
359	S359	2020-03-18	SMSS	10	C	17	Female	Day scholar	Village	Farmer	Farmer	No							No	No	No	No	Yes	Yes	No	Yes	No	No	No	No	Rabies & mange	Yes	Yes	No	Yes	No	Yes	No	No	No	No	No	No	Yes	Yes	No	Dog	No	No
360	S360	2020-03-18	SMSS	10	B	15	Male	Day scholar	Town	Military (RBP,RBA,RBG)	Housewife	No							No	No	No	No	Yes	No	No	Yes	No	No	No	No	Rabies	Yes	No	Yes	Yes	No	No	No	No	Yes	No	Yes	No	No	Yes	No	Dog	No	No
361	S361	2020-03-18	SMSS	10	A	17	Male	Day scholar	Town	Military (RBP,RBA,RBG)	Housewife	No							Yes	Yes	Yes	Yes	Yes	Yes	No	Yes	Yes	No	No	No	Rabies	Yes	Yes	Yes	Yes	Yes	Yes	Yes	No	Yes	Yes	No	No	Yes	Yes	No	Dog	No	No
362	S362	2020-03-18	SMSS	10	B	16	Male	Day scholar	Village	Farmer	Farmer	Yes	3	Adopted from street	Let it roam freely outside during daytime	Yes	Sometimes	No	No	Yes	No	Yes	No	Yes	No	Yes	Yes	Yes	No	No	Rabies	Yes	Yes	No	Yes	No	Yes	No	No	Yes	No	No	No	No	No	No	Dog	No	No
363	S363	2020-03-18	SMSS	10	B	15	Male	Day scholar	Town	Military (RBP,RBA,RBG)	Housewife	No							No	No	No	Yes	Yes	Yes	Yes	Yes	Yes	No	No	No	Rabies	Yes	Yes	No	Yes	No	Yes	No	No	No	No	No	No	Yes	No	No	Dog	No	No
364	S364	2020-03-18	SMSS	10	A	16	Male	Day scholar	Town	Military (RBP,RBA,RBG)	Housewife	No							No	Yes	No	No	No	No	No	Yes	Yes	No	No	No	Rabies	Yes	Yes	No	Yes	No	Yes	No	No	Yes	No	Yes	No	No	No	No	Dog	No	No
365	S365	2020-03-18	SMSS	10	A	16	Male	Day scholar	Village	Others(Specify)...........	Housewife	No							No	Yes	Yes	No	No	No	No	Yes	Yes	No	No	No	Rabies	Yes	No	No	Yes	No	No	No	No	No	No	No	No	Yes	Yes	No	Dog	No	No
366	S366	2020-03-18	SMSS	10	A	17	Male	Day scholar	Village	Farmer	Farmer	Yes	1	I don't know	Free roaming all the time	No		Yes	No	No	No	Yes	Yes	Yes	No	Yes	Yes	No	No	No	Rabies	Yes	Yes	Yes	Yes	Yes	Yes	Yes	No	No	No	No	Yes	Yes	Yes	No	Dog	No	No
367	S367	2020-03-18	SMSS	10	B	17	Female	Day scholar	Town	Military (RBP,RBA,RBG)	Housewife	No							No	No	No	No	Yes	Yes	No	Yes	Yes	Yes	No	No	Mange	Yes	Yes	No	Yes	No	Yes	Yes	No	No	No	No	No	No	No	Yes	Dog	No	No
368	S368	2020-03-18	SMSS	10	A	18	Female	Day scholar	Town	Military (RBP,RBA,RBG)	Housewife	Yes	1	Given by neighbour's/friends	Free roaming all the time	Yes	Every year	No	No	Yes	No	No	Yes	Yes	No	Yes	No	Yes	No	No	Rabies	Yes	Yes	No	Yes	Yes	No	Yes	No	No	No	Yes	No	Yes	No	No	Dog	No	No
369	S369	2020-03-18	SMSS	10	B	18	Female	Day scholar	Town	Military (RBP,RBA,RBG)	Housewife	No							No	Yes	No	No	Yes	No	No	No	Yes	No	Yes	No	Rabies & mange	Yes	Yes	No	Yes	Yes	Yes	No	No	No	No	Yes	No	Yes	No	No	Dog	No	No
370	S370	2020-03-18	SMSS	10	B	15	Female	Day scholar	Town	Military (RBP,RBA,RBG)	Housewife	Yes	1	Given by neighbour's/friends	Let it roam freely outside during daytime	Yes	Every year	Yes	No	No	No	No	Yes	Yes	No	Yes	Yes	No	No	No	Rabies	Yes	Yes	No	No	Yes	Yes	No	No	No	No	Yes	No	Yes	No	No	Dog	No	No
371	S371	2020-03-18	SMSS	10	A	16	Female	Day scholar	Village	Military (RBP,RBA,RBG)	Housewife	No							No	Yes	No	No	Yes	No	No	Yes	Yes	Yes	No	No	Rabies	Yes	Yes	No	Yes	Yes	Yes	Yes	No	Yes	No	Yes	No	No	No	No	I don't know	No	No
372	S372	2020-03-18	SMSS	10	A	16	Female	Day scholar	Town	Military (RBP,RBA,RBG)	Housewife	Yes	3	Given by neighbour's/friends	Let it roam freely outside during daytime	Yes	Every year	Yes	Yes	No	No	No	Yes	No	No	Yes	Yes	Yes	No	No	Rabies	Yes	Yes	No	Yes	Yes	Yes	Yes	No	Yes	No	Yes	No	Yes	Yes	No	Dog	No	No
373	S373	2020-03-18	SMSS	10	B	18	Female	Day scholar	Town	Military (RBP,RBA,RBG)	Housewife	No							No	No	Yes	No	Yes	No	No	Yes	Yes	Yes	No	No	Rabies	Yes	No	No	Yes	Yes	Yes	No	No	No	No	Yes	No	No	No	No	Bat	Yes	No
374	S374	2020-03-18	SMSS	10	B	15	Male	Day scholar	Village	Government employee	Government employee	Yes	3	Given by neighbour's/friends	Let it roam freely outside during daytime	Yes	Sometimes	No	Yes	Yes	Yes	Yes	Yes	Yes	No	Yes	Yes	Yes	No	No	Rabies	Yes	Yes	No	Yes	Yes	Yes	No	No	No	No	Yes	No	Yes	Yes	No	Dog	No	No
375	Sd375	2020-03-18	SMSS	10	A	16	Male	Day scholar	Village	Government employee	Government employee	No							Yes	Yes	Yes	Yes	Yes	Yes	No	Yes	Yes	Yes	No	No	Rabies	Yes	Yes	No	Yes	No	Yes	Yes	No	No	No	Yes	No	Yes	Yes	No	Dog	No	No
376	S376	2020-03-18	SMSS	10	A	15	Male	Day scholar	Village	Others(Specify)...........	Housewife	Yes	1	Given by neighbour's/friends	Keep inside the house compound all the time	Yes	Every year	No	Yes	No	No	No	Yes	Yes	No	Yes	Yes	No	No	No	Rabies	Yes	Yes	No	Yes	Yes	Yes	Yes	No	Yes	No	No	No	Yes	Yes	No	Dog	Yes	No
377	S377	2020-03-18	SMSS	10	A	16	Male	Day scholar	Town	Others(Specify)...........	Housewife	Yes	1	Adopted from street	Free roaming all the time	No		No	Yes	No	No	No	Yes	Yes	No	Yes	Yes	No	No	No	Rabies	Yes	Yes	No	No	Yes	Yes	Yes	No	No	No	No	No	Yes	Yes	No	Dog	Yes	No
378	S378	2020-03-18	SMSS	10	A	17	Male	Day scholar	Town	Government employee	Housewife	No							No	Yes	Yes	No	Yes	Yes	No	Yes	No	No	No	No	Rabies	Yes	Yes	Yes	Yes	Yes	Yes	Yes	No	No	Yes	Yes	No	Yes	No	No	Dog	No	No
379	S379	2020-03-18	SMSS	10	C	15	Male	Day scholar	Village	Government employee	Housewife	Yes	3	Given by neighbour's/friends	Free roaming all the time	Yes	Sometimes	I don't know	Yes	No	Yes	Yes	Yes	Yes	No	Yes	No	Yes	Yes	No	Rabies	Yes	Yes	Yes	Yes	Yes	Yes	Yes	No	Yes	Yes	Yes	No	Yes	No	No	I don't know	No	Yes
380	S380	2020-03-18	SMSS	10	C	17	Male	Day scholar	Village	Farmer	Farmer	Yes	3	Adopted from street	Free roaming all the time	No		No	No	No	No	No	No	Yes	No	Yes	Yes	No	No	No	Rabies	Yes	Yes	No	Yes	Yes	No	Yes	No	No	No	Yes	No	No	No	No	Dog	No	No
381	S381	2020-03-18	SMSS	10	A	17	Male	Day scholar	Village	Farmer	Farmer	No							No	No	No	No	No	Yes	No	Yes	No	No	No	No	Rabies	Yes	Yes	No	Yes	Yes	Yes	Yes	No	No	No	Yes	No	No	No	No	Dog	No	No
382	S382	2020-03-18	SMSS	10	A	15	Male	Day scholar	Town	Government employee	Housewife	No							No	No	No	No	Yes	No	No	Yes	Yes	No	No	No	Rabies	Yes	Yes	No	Yes	No	Yes	No	No	No	No	Yes	No	No	Yes	No	Dog	No	No
383	S383	2020-03-18	SMSS	10	B	16	Male	Day scholar	Village	Farmer	Farmer	No							No	No	No	No	Yes	Yes	No	Yes	Yes	No	No	No	Rabies	Yes	Yes	No	Yes	No	Yes	No	No	No	No	Yes	No	Yes	No	No	Dog	No	No
384	S384	2020-03-18	SMSS	10	B	15	Female	Day scholar	Town	Private/coorporate employee	Housewife	Yes	1	Given by neighbour's/friends	Let it roam freely outside during daytime	Yes	Every year	No	No	No	No	Yes	Yes	Yes	No	Yes	Yes	No	No	No	Rabies & mange	Yes	Yes	Yes	Yes	No	Yes	No	No	No	Yes	Yes	No	No	Yes	No	Dog	No	No
385	S385	2020-03-18	SMSS	10	B	15	Female	Day scholar	Town	Military (RBP,RBA,RBG)	Housewife	No							No	No	No	No	Yes	Yes	No	Yes	Yes	No	No	No	Rabies & mange	Yes	Yes	No	Yes	Yes	Yes	No	No	No	No	Yes	No	Yes	No	No	Dog	No	No
386	S386	2020-03-18	SMSS	10	B	16	Female	Day scholar	Village	Government employee	Housewife	No							No	No	No	Yes	Yes	Yes	No	Yes	Yes	Yes	No	No	Rabies	Yes	Yes	No	Yes	No	Yes	No	No	Yes	No	Yes	Yes	Yes	No	No	Bat	Yes	No
387	S387	2020-03-18	SMSS	10	B	15	Female	Day scholar	Village	Military (RBP,RBA,RBG)	Bussinesswomen	Yes	1	Purchased from other people in Bhutan	Keep inside the house compound all the time	Yes	Sometimes	Yes	No	No	No	Yes	Yes	Yes	No	Yes	Yes	No	No	No	Rabies & mange	Yes	Yes	No	Yes	Yes	Yes	Yes	No	No	No	No	No	Yes	No	No	Dog	Yes	No
388	S388	2020-03-18	SMSS	10	B	15	Female	Day scholar	Village	Private/coorporate employee	Housewife	No							No	No	No	Yes	Yes	Yes	No	Yes	Yes	Yes	No	No	Rabies	Yes	Yes	No	No	Yes	Yes	No	No	No	No	No	No	Yes	No	No	Dog	Yes	No
389	S389	2020-03-18	SMSS	10	A	16	Female	Day scholar	Town	Military (RBP,RBA,RBG)	Housewife	No							No	Yes	No	No	Yes	Yes	No	Yes	Yes	No	No	No	Rabies & mange	Yes	Yes	No	No	Yes	Yes	No	No	No	No	Yes	No	Yes	No	No	Dog	No	No
390	S390	2020-03-18	SMSS	10	B	16	Female	Day scholar	Town	Military (RBP,RBA,RBG)	Housewife	No							No	Yes	No	Yes	Yes	Yes	No	Yes	Yes	No	No	No	Rabies	Yes	Yes	No	Yes	No	Yes	No	No	No	Yes	Yes	Yes	Yes	Yes	No	Dog	No	No
391	S391	2020-03-18	SMSS	10	A	14	Male	Day scholar	Town	Government employee	Housewife	No							Yes	No	No	Yes	No	Yes	No	Yes	Yes	No	No	No	Rabies	Yes	Yes	Yes	No	No	No	No	No	Yes	No	Yes	No	No	Yes	No	Bat	Yes	No
392	S392	2020-03-18	SMSS	10	B	17	Male	Day scholar	Village	Farmer	Farmer	Yes	1	Purchased from other people in Bhutan	Keep inside the house compound all the time	Yes	Every year	Yes	No	No	No	No	No	Yes	No	Yes	No	No	No	No	Rabies	Yes	Yes	Yes	No	No	Yes	No	No	No	No	Yes	No	No	No	No	Dog	No	No
393	S393	2020-03-18	SMSS	10	A	17	Male	Day scholar	Town	Military (RBP,RBA,RBG)	Housewife	No							No	Yes	No	No	No	Yes	No	Yes	No	Yes	No	No	Rabies	Yes	No	No	No	Yes	Yes	No	No	Yes	No	Yes	No	No	No	No	Dog	No	No
394	S394	2020-03-18	SMSS	10	C	15	Male	Day scholar	Village	Government employee	Housewife	No							No	No	No	No	No	Yes	No	Yes	No	No	No	No	Rabies	Yes	Yes	Yes	No	No	Yes	No	No	No	No	Yes	No	No	No	No	Dog	No	No
395	S395	2020-03-18	SMSS	10	C	15	Male	Day scholar	Village	Bussinessman	Bussinesswomen	No							No	No	No	No	No	Yes	No	Yes	No	No	No	No	Rabies	Yes	Yes	Yes	Yes	Yes	Yes	No	No	No	No	Yes	No	No	No	No	Dog	No	No
396	S396	2020-03-18	SMSS	10	C	17	Male	Day scholar	Village	Bussinessman	Housewife	No							No	No	No	No	No	Yes	No	Yes	No	No	No	No	Rabies	Yes	Yes	Yes	No	No	Yes	No	No	No	No	Yes	No	No	No	No	Dog	No	No
397	S397	2020-03-18	SMSS	10	B	17	Male	Day scholar	Town	Military (RBP,RBA,RBG)	Housewife	No							Yes	Yes	Yes	Yes	Yes	Yes	No	Yes	No	No	No	No	Rabies	Yes	Yes	No	No	Yes	Yes	Yes	No	Yes	No	Yes	No	No	Yes	No	Dog	No	No
398	P398	2020-02-12	PMSS	8	A	13	Female	Day scholar	Town	Private/coorporate employee	Bussinesswomen	No							No	Yes	No	No	No	Yes	Yes	Yes	No	No	No	No	Rabies	Yes	Yes	No	No	No	Yes	No	No	No	No	Yes	No	Yes	No	No	Dog	No	No
399	P399	2020-02-12	PMSS	8	A	12	Female	Day scholar	Town	Bussinessman	Housewife	No							No	No	Yes	Yes	Yes	Yes	No	Yes	Yes	Yes	No	No	Skin diseases,rabies, fracture	Yes	Yes	Yes	Yes	Yes	Yes	Yes	No	Yes	No	Yes	No	Yes	No	No	Dog	No	No
400	P400	2020-02-12	PMSS	8	A	19	Female	Day scholar	Town	Government employee	Bussinesswomen	Yes	3	Adopted from street	Keep inside the house compound all the time	Yes	Sometimes	Yes	No	No	No	No	No	Yes	No	Yes	No	No	No	No	Rabies & mange	Yes	Yes	No	No	No	No	No	No	No	No	No	No	No	Yes	No	Dog	No	No
401	P401	2020-02-12	PMSS	8	A	16	Male	Day scholar	Town	Others(Specify)...........	Bussinesswomen	Yes	2	Given by neighbour's/friends	Keep inside the house compound all the time	Yes	Sometimes	Yes	No	No	No	No	Yes	Yes	No	No	No	Yes	No	No	Rabies	Yes	No	No	No	Yes	Yes	No	No	No	No	No	No	No	No	Yes	Dog	No	No
402	P402	2020-02-12	PMSS	8	A	15	Female	Day scholar	Town	Others(Specify)...........	Housewife	Yes	1	Given by neighbour's/friends	Keep inside the house compound all the time	Yes	Sometimes	No	No	No	No	No	Yes	Yes	Yes	Yes	Yes	Yes	No	No	Rabies & mange	Yes	No	No	Yes	Yes	Yes	No	No	No	No	Yes	No	Yes	Yes	No	Dog	No	No
403	P403	2020-02-12	PMSS	8	A	14	Female	Day scholar	Village	Others(Specify)...........	Housewife	Yes	6	Given by neighbour's/friends	Let it roam freely outside during daytime	Yes	I don't know	No	No	No	No	No	Yes	Yes	No	Yes	No	No	No	No	Rabies	Yes	No	No	No	No	No	No	Yes	No	No	Yes	No	No	Yes	No	Dog	No	No
404	P404	2020-02-12	PMSS	8	A	14	Female	Day scholar	Town	Others(Specify)...........	Housewife	Yes	1	Given by neighbour's/friends	Keep inside the house compound all the time	Yes	I don't know	I don't know	No	No	No	No	Yes	Yes	Yes	Yes	Yes	No	No	No	Rabies	Yes	No	No	Yes	Yes	Yes	No	No	No	No	Yes	No	Yes	Yes	No	Dog	No	No
405	P405	2020-02-12	PMSS	8	A	15	Male	Day scholar	Town	Others(Specify)...........	Housewife	Yes	2	Given by neighbour's/friends	Free roaming all the time	I don't know	I don't know	I don't know	No	No	No	No	No	Yes	Yes	Yes	Yes	No	No	Yes	Mange	No	No	No	No	No	No	No	No	No	No	No	No	No	No	No		No	No
406	P406	2020-02-12	PMSS	8	A	13	Male	Day scholar	Town	Government employee	Bussinesswomen	No							No	No	No	No	Yes	Yes	No	Yes	Yes	No	No	No	Rabies	Yes	Yes	No	Yes	Yes	Yes	Yes	No	No	No	Yes	No	Yes	Yes	No	Dog	Yes	Yes
407	P407	2020-02-12	PMSS	8	A	12	Male	Day scholar	Town	Government employee	Government employee	No							No	No	No	No	Yes	Yes	No	Yes	No	No	No	No	Rabies	Yes	Yes	Yes	No	No	Yes	No	No	Yes	No	Yes	No	Yes	No	No	Dog	No	No
408	P408	2020-02-12	PMSS	8	A	14	Female	Day scholar	Town	Others(Specify)...........	Housewife	No							No	No	No	No	Yes	Yes	No	Yes	Yes	No	No	No	Rabies	Yes	Yes	No	Yes	No	Yes	Yes	No	No	No	No	No	No	No	Yes	Dog	No	No
409	P409	2020-02-12	PMSS	8	A	17	Male	Day scholar	Town	Bussinessman	Housewife	Yes	1	Given by neighbour's/friends	Keep inside the house compound all the time	Yes	Sometimes	No	Yes	Yes	Yes	No	Yes	Yes	No	Yes	Yes	Yes	No	No	Rabies	Yes	Yes	No	No	Yes	Yes	No	No	Yes	No	Yes	No	Yes	Yes	No	Bat	No	Yes
410	P410	2020-02-12	PMSS	8	A	14	Female	Day scholar	Town	Private/coorporate employee	Housewife	No							No	Yes	No	No	No	Yes	No	Yes	No	No	No	No	Rabies	Yes	Yes	No	Yes	No	Yes	Yes	No	No	No	Yes	No	Yes	Yes	No	Dog	No	No
411	P411	2020-02-12	PMSS	8	A	14	Female	Day scholar	Town	Bussinessman	Bussinesswomen	Yes	2	Given by neighbour's/friends	Free roaming all the time	Yes	Every year	No	No	No	No	No	No	No	Yes	Yes	No	No	No	No		Yes	No	No	Yes	No	Yes	No	No	No	No	No	No	No	No	Yes	Dog	No	No
412	P412	2020-02-12	PMSS	8	A	14	Female	Day scholar	Village	Private/coorporate employee	Housewife	Yes	1	Given by neighbour's/friends	Keep inside the house compound all the time	Yes	Every year	No	No	No	No	No	Yes	Yes	No	Yes	No	No	No	No	Rabies	Yes	Yes	No	Yes	No	Yes	No	No	No	No	Yes	No	No	Yes	No	Bat	Yes	No
413	P413	2020-02-12	PMSS	8	A	14	Female	Day scholar	Town	Private/coorporate employee	Housewife	Yes	1	Purchased from other people in Bhutan	Keep inside the house compound all the time	Yes	Every year	Yes	No	Yes	No	No	No	Yes	No	Yes	No	No	No	No	Rabies	Yes	Yes	No	Yes	No	Yes	Yes	No	No	No	Yes	No	Yes	Yes	No	Dog	No	No
414	P414	2020-02-12	PMSS	8	A	17	Male	Day scholar	Village	Farmer	Farmer	No							No	No	No	No	No	Yes	No	Yes	No	No	No	No	Rabies	Yes	No	Yes	No	No	No	No	No	No	No	No	No	No	Yes	No	Dog	No	No
415	P415	2020-02-12	PMSS	8	A	13	Male	Day scholar	Town	Military (RBP,RBA,RBG)	Housewife	No							No	No	No	No	No	Yes	No	Yes	No	No	No	No	Rabies	Yes	Yes	Yes	No	No	No	No	No	No	No	No	No	No	Yes	No	Dog	No	No
416	P416	2020-02-12	PMSS	8	A	12	Female	Day scholar	Town	Government employee	Bussinesswomen	Yes	1						No	No	No	No	Yes	Yes	Yes	No	No	No	No	Yes	Rabies	Yes	No	No	No	No	Yes	No	No	No	No	Yes	No	No	No	No	Dog	No	No
417	p417	2020-02-12	PMSS	8	A	14	Female	Day scholar	Town	Others(Specify)...........	Housewife	Yes	1	Given by neighbour's/friends	Keep inside the house compound all the time	Yes	I don't know	I don't know	No	No	No	No	No	Yes	No	Yes	No	No	No	No	Rabies	Yes	No	Yes	No	No	No	No	No	No	No	No	No	No	No	Yes	Dog	No	No
418	P418	2020-02-12	PMSS	8	A	14	Female	Day scholar	Town	Private/coorporate employee	Housewife	No							No	No	No	Yes	Yes	Yes	No	Yes	No	Yes	No	No	Vomiting,rashes,fracture	Yes	Yes	Yes	No	No	Yes	No	No	Yes	No	Yes	No	Yes	No	No	Dog	No	No
419	P419	2020-02-12	PMSS	8	A	14	Female	Day scholar	Town	Government employee	Housewife	No							Yes	No	No	Yes	No	No	No	Yes	Yes	No	No	No	Rabies, Skin diseases	Yes	No	No	No	No	No	No	Yes	No	No	Yes	No	No	Yes	No	Dog	No	No
420	P420	2020-02-12	PMSS	8	A	14	Female	Day scholar	Town	Others(Specify)...........	Housewife	No							No	No	No	No	Yes	Yes	Yes	Yes	Yes	No	No	No	Rabies	Yes	Yes	No	No	No	Yes	No	No	No	No	Yes	No	No	Yes	No	Dog	No	No
421	P421	2020-02-12	PMSS	8	A	13	Female	Day scholar	Town	Others(Specify)...........	Housewife	No							Yes	No	No	Yes	Yes	Yes	No	Yes	Yes	No	No	No	Rabies,skin diseases, eye problem	Yes	No	No	No	No	No	No	Yes	No	No	Yes	No	No	No	No	Dog	No	No
422	P422	2020-02-12	PMSS	8	A	14	Male	Day scholar	Town	Bussinessman	Housewife	Yes	2	Given by neighbour's/friends	Free roaming all the time	I don't know	I don't know	Yes	No	No	No	No	No	Yes	No	Yes	No	No	No	No	Rabies	Yes	Yes	No	No	No	No	No	No	No	No	No	No	No	No	Yes	Dog	No	No
423	P423	2020-02-12	PMSS	8	A	12	Female	Day scholar	Town	Private/coorporate employee	Housewife	No							No	No	No	No	Yes	Yes	No	Yes	Yes	Yes	No	No	Rabies	Yes	No	No	Yes	Yes	Yes	Yes	No	No	No	Yes	No	Yes	Yes	No	Dog	No	No
424	P424	2020-02-12	PMSS	8	A	14	Female	Day scholar	Town	Government employee	Housewife	No							No	No	No	No	No	Yes	Yes	Yes	Yes	No	No	No	Rabies	Yes	Yes	No	Yes	Yes	No	No	No	No	No	Yes	No	Yes	Yes	No	Dog	No	No
425	P425	2020-02-12	PMSS	8	A	15	Female	Day scholar	Town	Others(Specify)...........	Housewife	Yes	2	Given by neighbour's/friends	Let it roam freely outside during daytime	Yes	I don't know	I don't know	No	No	No	No	Yes	Yes	No	Yes	No	Yes	No	No	Rabies	Yes	No	No	Yes	No	Yes	No	No	No	No	Yes	No	No	No	No	Dog	No	No
426	P426	2020-02-12	PMSS	8	A	12	Female	Day scholar	Town	Government employee	Private/coorporate employee	No							No	No	Yes	Yes	Yes	Yes	No	Yes	Yes	No	No	Yes	Rabies & mange	Yes	Yes	No	No	No	No	Yes	No	Yes	No	No	No	Yes	No	No	Dog	No	No
427	P427	2020-02-12	PMSS	8	A	14	Male	Day scholar	Town	Government employee	Government employee	No							No	No	No	No	No	Yes	Yes	Yes	No	No	No	No	Rabies	Yes	No	No	No	Yes	Yes	Yes	No	Yes	No	No	No	No	No	No	Dog	No	No
428	P428	2020-02-12	PMSS	8	A	15	Male	Day scholar	Town	Private/coorporate employee	Housewife	No							No	No	No	Yes	No	No	No	Yes	Yes	No	No	No	Rabies	Yes	No	No	No	Yes	No	No	No	Yes	No	No	No	No	No	No	Dog	No	No
429	P429	2020-02-12	PMSS	8	A	16	Male	Day scholar	Town	Private/coorporate employee	Housewife	Yes	1	Purchased from other people in Bhutan	Keep inside the house compound all the time	Yes	Every year	No	No	No	No	Yes	No	Yes	Yes	No	No	Yes	No	No	Mange	Yes	Yes	Yes	Yes	Yes	Yes	Yes	No	Yes	No	Yes	No	Yes	Yes	No	Dog	Yes	Yes
430	P430	2020-02-12	PMSS	8	A	15	Male	Day scholar	Town	Private/coorporate employee	Housewife	Yes	1	Given by neighbour's/friends	Keep inside the house compound all the time	Yes	Every year	I don't know	Yes	No	No	Yes	No	No	Yes	Yes	Yes	Yes	No	No	Fever	Yes	No	No	Yes	Yes	Yes	Yes	No	Yes	No	Yes	Yes	Yes	No	No	I don't know	Yes	No
431	P431	2020-02-12	PMSS	9	A	13	Male	Day scholar	Town	Government employee	Others(Specify)................	Yes	1	Given by neighbour's/friends	Free roaming all the time	I don't know	I don't know	Yes	No	Yes	No	Yes	Yes	Yes	No	Yes	Yes	Yes	No	No	Rabies & mange	Yes	Yes	No	Yes	Yes	Yes	Yes	No	No	No	Yes	No	Yes	Yes	No	Dog	No	Yes
432	P432	2020-02-12	PMSS	9	A	17	Male	Day scholar	Town	Bussinessman	Government employee	Yes	1	I don't know	Let it roam freely outside during daytime	I don't know		I don't know	No	No	No	No	No	Yes	No	Yes	Yes	No	No	No	Rabies & mange	No	No	No	No	No	No	No	No	No	No	No	No	No	No	No		No	No
433	P433	2020-02-12	PMSS	9	A	14	Female	Day scholar	Village	Bussinessman	Bussinesswomen	No							No	No	No	No	No	Yes	No	Yes	No	No	No	No	Rabies & mange	Yes	Yes	No	No	Yes	Yes	Yes	No	Yes	No	Yes	Yes	Yes	Yes	No	Dog	No	No
434	P434	2020-02-12	PMSS	9	A	14	Male	Day scholar	Village	Government employee	Housewife	No							No	No	No	No	No	Yes	No	Yes	Yes	No	No	No		Yes	No	No	Yes	No	No	No	No	No	No	Yes	No	No	No	No	Dog	No	No
435	P435	2020-02-12	PMSS	9	A	14	Female	Day scholar	Town	Bussinessman	Housewife	Yes	1	Purchased from other people in Bhutan	Keep inside the house compound all the time	Yes	I don't know	No	No	No	No	No	Yes	Yes	No	Yes	No	Yes	No	No	Rabies	Yes	Yes	No	Yes	No	Yes	Yes	No	No	No	Yes	No	No	No	No	Dog	Yes	No
436	P436	2020-02-12	PMSS	9	A	14	Female	Day scholar	Town	Military (RBP,RBA,RBG)	Housewife	Yes	2	Purchased from other people in Bhutan	Let it roam freely outside during daytime	Yes	Every year	No	No	Yes	Yes	No	Yes	Yes	No	Yes	Yes	No	No	No	Rabies	Yes	Yes	Yes	No	Yes	Yes	Yes	No	No	No	No	No	No	No	Yes	Dog	No	No
437	P437	2020-02-12	PMSS	9	A	14	Female	Day scholar	Village	Government employee	Housewife	No							No	No	No	No	Yes	Yes	No	Yes	Yes	Yes	No	No	Rabies	Yes	Yes	Yes	No	No	Yes	No	No	No	No	No	No	Yes	No	No	Dog	No	No
438	S438	2020-02-12	PMSS	9	A	14	Female	Day scholar	Village	Farmer	Farmer	Yes	1	Given by neighbour's/friends	Let it roam freely outside during daytime	I don't know	I don't know	I don't know	No	Yes	No	No	Yes	Yes	Yes	Yes	Yes	No	No	No	Rabies	Yes	Yes	No	Yes	No	Yes	Yes	No	No	No	Yes	No	No	Yes	No	I don't know	No	No
439	S439	2020-02-12	PMSS	9	A	14	Female	Day scholar	Town	Government employee	Housewife	No							Yes	No	Yes	Yes	No	Yes	No	Yes	Yes	No	No	No	Rabies & mange	Yes	Yes	No	Yes	No	Yes	No	No	No	No	No	No	No	No	Yes	Dog	Yes	Yes
440	S440	2020-02-12	PMSS	9	A	14	Female	Day scholar	Town	Military (RBP,RBA,RBG)	Housewife	No							No	No	No	No	No	No	Yes	Yes	No	No	No	No		Yes	No	No	No	Yes	Yes	Yes	No	No	No	Yes	No	No	Yes	No	Dog	No	No
441	P441	2020-02-12	PMSS	9	A	14	Female	Day scholar	Town	Bussinessman	Government employee	Yes	1	I don't know	Free roaming all the time	I don't know	I don't know	I don't know	No	Yes	No	Yes	Yes	No	No	Yes	Yes	No	No	No	Rabies	Yes	Yes	No	Yes	Yes	Yes	Yes	No	Yes	No	Yes	No	No	Yes	No	Bat	Yes	Yes
442	P442	2020-02-12	PMSS	9	A	14	Female	Day scholar	Town	Government employee	Housewife	No							No	No	No	No	Yes	Yes	No	Yes	Yes	No	No	No	Rabies	Yes	Yes	Yes	Yes	Yes	Yes	No	No	No	No	Yes	No	No	No	No	Dog	No	No
443	P443	2020-02-12	SMSS	9	A	15	Female	Day scholar	Town	Others(Specify)...........	Housewife	No							No	No	No	No	No	Yes	Yes	Yes	No	No	No	Yes	Mange	Yes	Yes	No	No	No	Yes	Yes	No	No	No	Yes	No	No	No	No	Dog	No	No
444	P444	2020-02-12	PMSS	9	A	15	Female	Day scholar	Town	Others(Specify)...........	Housewife	No							No	No	No	No	Yes	Yes	No	Yes	Yes	No	No	No	Rabies & mange	Yes	No	No	Yes	No	Yes	No	No	No	No	No	No	Yes	No	No	Dog	No	No
445	P445	2020-02-12	PMSS	9	A	14	Male	Day scholar	Town	Military (RBP,RBA,RBG)	Government employee	No							Yes	No	No	No	No	Yes	No	Yes	Yes	No	No	No	Rabies & mange	Yes	Yes	No	Yes	No	Yes	No	No	Yes	No	Yes	No	No	Yes	No	Dog	No	No
446	P446	2020-02-12	PMSS	9	A	16	Female	Day scholar	Town	Government employee	Housewife	Yes	1	Given by neighbour's/friends	Keep inside the house compound all the time	Yes	Sometimes	I don't know	No	Yes	Yes	No	Yes	Yes	No	Yes	Yes	Yes	No	No	Rabies	Yes	Yes	Yes	Yes	Yes	Yes	No	No	No	No	No	No	Yes	Yes	No	Dog	No	No
447	P447	2020-02-12	PMSS	9	A	17	Female	Day scholar	Town	Others(Specify)...........	Housewife	No							No	Yes	No	No	No	Yes	No	Yes	No	No	No	No	Rabies	Yes	Yes	No	No	No	No	No	No	No	No	No	No	No	No	Yes	Dog	No	No
448	P448	2020-02-12	PMSS	9	A	15	Female	Day scholar	Town	Government employee	Housewife	No							No	No	No	No	Yes	Yes	No	Yes	Yes	No	No	No	Rabies	Yes	Yes	No	Yes	Yes	Yes	Yes	No	No	No	Yes	No	No	No	No	Dog	No	No
449	P449	2020-02-12	PMSS	9	A	14	Male	Day scholar	Town	Private/coorporate employee	Government employee	No							No	No	No	No	Yes	Yes	No	Yes	Yes	No	No	No	Yes	Yes	Yes	No	Yes	No	Yes	No	No	No	No	Yes	No	No	No	No	Dog	No	No
450	P450	2020-02-12	PMSS	9	A	15	Male	Day scholar	Town	Private/coorporate employee	Government employee	Yes	1	Given by neighbour's/friends	Let it roam freely outside during daytime	Yes	Every year	Yes	Yes	No	No	Yes	No	Yes	No	Yes	Yes	No	No	No	Mange	Yes	Yes	No	Yes	Yes	Yes	Yes	No	Yes	No	Yes	No	Yes	No	No	Dog	No	Yes
451	P451	2020-02-12	PMSS	9	A	18	Male	Day scholar	Town	Private/coorporate employee	Housewife	No							No	No	No	No	Yes	Yes	No	Yes	Yes	No	No	No	Mange	Yes	No	No	No	Yes	Yes	No	No	Yes	No	Yes	No	No	Yes	No	Dog	No	No
454	P452	2020-02-12	PMSS	9	A	17	Male	Day scholar	Town	Military (RBP,RBA,RBG)	Housewife	No							No	No	No	No	Yes	No	No	Yes	Yes	No	No	No	Rabies	Yes	Yes	Yes	No	No	Yes	No	No	No	No	No	Yes	No	No	No	Dog	No	No
455	P453	2020-02-12	PMSS	9	A	16	Male	Day scholar	Town	Private/coorporate employee	Housewife	No							No	No	No	No	Yes	Yes	No	Yes	No	Yes	No	No	Mange	Yes	No	Yes	Yes	Yes	Yes	Yes	No	No	No	Yes	No	Yes	Yes	No	Dog	No	No
456	P454	2020-02-12	PMSS	9	A	14	Male	Day scholar	Town	Military (RBP,RBA,RBG)	Government employee	Yes	1	Given by neighbour's/friends	Free roaming all the time	Yes	Sometimes	Yes	No	No	Yes	Yes	Yes	Yes	No	Yes	Yes	No	No	No	Rabies	Yes	Yes	Yes	No	Yes	No	Yes	No	Yes	No	No	No	No	Yes	No	Dog	No	No
457	P455	2020-02-12	PMSS	9	A	15	Male	Day scholar	Town	Military (RBP,RBA,RBG)	Housewife	Yes	1	Given by neighbour's/friends	Keep inside the house compound all the time	Yes	Every year	Yes	No	No	Yes	No	No	No	No	Yes	No	No	No	No		Yes	No	Yes	No	No	No	No	No	No	No	No	No	No	No	Yes	Dog	No	No
458	P456	2020-02-12	PMSS	9	A	15	Male	Day scholar	Town	Bussinessman	Housewife	No							No	No	Yes	No	No	No	No	Yes	Yes	No	No	No		No	No	No	No	No	No	No	No	No	No	No	No	No	No	No		No	No
459	P457	2020-02-12	PMSS	9	A	14	Female	Day scholar	Village	Military (RBP,RBA,RBG)	Housewife	No							No	No	No	No	No	Yes	No	Yes	No	No	No	No	Rabies	Yes	Yes	No	No	No	No	No	No	No	No	No	No	No	No	Yes	Dog	No	No
460	P458	2020-02-12	PMSS	9	A	15	Female	Day scholar	Town	Bussinessman	Bussinesswomen	No							No	No	No	No	Yes	No	No	Yes	No	No	No	No	Rabies	Yes	Yes	No	Yes	No	No	No	No	No	No	Yes	No	Yes	Yes	No	Dog	No	No
461	P459	2020-02-12	PMSS	9	A	14	Female	Day scholar	Town	Government employee	Private/coorporate employee	No							No	Yes	No	No	No	Yes	No	Yes	No	No	No	No	Rabies	Yes	Yes	No	No	No	No	No	No	No	No	No	No	No	No	Yes	Dog	No	No
462	P460	2020-02-12	PMSS	9	A	15	Female	Day scholar	Town	Others(Specify)...........	Bussinesswomen	No							No	No	No	No	Yes	Yes	No	Yes	Yes	No	No	No	Rabies	Yes	Yes	Yes	No	Yes	No	No	No	Yes	No	Yes	Yes	Yes	No	No	Dog	No	No
463	P461	2020-02-12	PMSS	9	A	14	Female	Day scholar	Town	Government employee	Housewife	No							No	No	No	No	Yes	Yes	No	Yes	Yes	No	No	No	Rabies	Yes	No	No	Yes	Yes	Yes	Yes	No	No	No	No	Yes	Yes	Yes	No	Dog	No	No
464	P462	2020-02-12	PMSS	9	A	13	Female	Day scholar	Village	Private/coorporate employee	Government employee	No							No	Yes	No	No	Yes	Yes	No	Yes	No	Yes	No	No	Rabies	Yes	Yes	Yes	No	No	Yes	No	No	Yes	No	No	No	Yes	Yes	No	Dog	No	No
465	S463	2020-02-12	PMSS	9	A	14	Female	Day scholar	Town	Private/coorporate employee	Housewife	No							No	No	No	No	No	Yes	No	Yes	Yes	No	No	No		Yes	Yes	No	Yes	No	Yes	No	No	Yes	No	No	No	Yes	No	No	Dog	No	No
466	P464	2020-02-12	PMSS	9	A	15	Male	Day scholar	Town	Military (RBP,RBA,RBG)	Housewife	Yes	1	Given by neighbour's/friends	Free roaming all the time	Yes	Every year	I don't know	No	Yes	No	No	No	Yes	No	Yes	No	No	No	No	Rabies	Yes	Yes	No	Yes	No	Yes	No	No	Yes	No	No	No	No	Yes	No	Dog	No	No
467	P465	2020-02-12	PMSS	9	B	14	Female	Day scholar	Town	Military (RBP,RBA,RBG)	Housewife	No							No	Yes	No	No	Yes	Yes	No	Yes	No	No	No	No	Rabies	Yes	Yes	No	No	Yes	Yes	No	No	Yes	No	No	Yes	No	No	No	Dog	No	No
468	P466	2020-02-12	PMSS	9	B	15	Female	Day scholar	Town	Military (RBP,RBA,RBG)	Housewife	Yes	1	Given by neighbour's/friends	Let it roam freely outside during daytime	Yes	Sometimes	Yes	No	No	No	No	No	No	No	Yes	Yes	No	No	No	Rabies	Yes	Yes	No	No	Yes	Yes	No	No	No	No	Yes	No	No	Yes	No	Dog	No	No
469	P467	2020-02-12	PMSS	9	B	14	Female	Day scholar	Town	Others(Specify)...........	Bussinesswomen	No							Yes	No	No	Yes	No	Yes	No	Yes	Yes	Yes	No	No	Rabies	Yes	Yes	Yes	Yes	Yes	Yes	Yes	No	Yes	No	Yes	Yes	Yes	No	No	Dog	No	No
470	P468	2020-02-12	PMSS	9	B	14	Female	Day scholar	Town	Private/coorporate employee	Housewife	No							No	Yes	No	No	No	Yes	No	Yes	Yes	Yes	No	No		Yes	Yes	Yes	No	No	No	No	No	No	No	Yes	No	No	Yes	No	Dog	No	No
471	P469	2020-02-12	PMSS	9	B	14	Male	Day scholar	Town	Military (RBP,RBA,RBG)	Housewife	No							No	No	No	No	Yes	Yes	No	Yes	Yes	Yes	No	No		Yes	Yes	Yes	No	No	Yes	No	No	No	No	Yes	Yes	No	Yes	No	Dog	No	No
472	P470	2020-02-12	PMSS	9	B	15	Female	Day scholar	Town	Others(Specify)...........	Housewife	No							No	No	No	No	Yes	Yes	No	Yes	No	No	No	No		Yes	No	No	No	Yes	No	Yes	No	No	No	Yes	No	No	Yes	No	Dog	No	No
473	P471	2020-02-12	PMSS	9	B	14	Male	Day scholar	Town	Bussinessman	Government employee	No							No	No	No	Yes	Yes	Yes	No	Yes	No	Yes	No	No		Yes	Yes	No	Yes	Yes	Yes	Yes	No	Yes	No	Yes	Yes	No	Yes	No	Dog	Yes	No
474	P472	2020-02-12	PMSS	9	B	14	Female	Day scholar	Town	Government employee	Military (RBA,RBP,RBG)	No							No	No	No	No	Yes	Yes	No	Yes	Yes	No	No	No		Yes	Yes	No	Yes	No	Yes	No	No	No	No	Yes	No	Yes	Yes	No	Dog	No	No
475	P473	2020-02-12	PMSS	9	B	17	Male	Day scholar	Town	Private/coorporate employee	Housewife	No							No	No	No	No	Yes	No	Yes	Yes	No	Yes	No	No	Rabies	Yes	Yes	No	Yes	No	Yes	No	No	No	No	Yes	No	Yes	No	No	Dog	No	No
476	P474	2020-02-12	PMSS	9	B	15	Female	Day scholar	Town	Private/coorporate employee	Housewife	No							No	No	No	No	Yes	No	No	Yes	Yes	No	No	No	Rabies	Yes	Yes	Yes	No	No	Yes	No	No	No	Yes	Yes	No	No	No	No	Dog	No	No
477	P475	2020-02-12	PMSS	9	B	15	Male	Day scholar	Town	Private/coorporate employee	Private/coorporate employee	Yes	1	Purchased from other people in Bhutan	Keep inside the house compound all the time	Yes	Every year	Yes	No	Yes	No	Yes	No	No	No	Yes	No	Yes	No	No	Mange	Yes	Yes	No	No	Yes	Yes	No	No	Yes	No	No	Yes	No	No	No	Dog	Yes	No
478	P476	2020-02-12	PMSS	9	B	15	Male	Day scholar	Town	Military (RBP,RBA,RBG)	Housewife	No							No	Yes	No	Yes	Yes	Yes	No	Yes	Yes	Yes	No	No	i don;t know	Yes	Yes	No	Yes	Yes	Yes	No	No	Yes	Yes	Yes	No	Yes	Yes	No	Dog	No	No
479	P477	2020-02-12	PMSS	9	B	14	Male	Day scholar	Town	Military (RBP,RBA,RBG)	Housewife	No							No	No	No	No	Yes	No	Yes	Yes	Yes	No	No	No		Yes	No	No	No	Yes	No	No	No	No	No	No	No	No	Yes	No	Dog	No	No
480	P478	2020-02-12	PMSS	9	B	15	Female	Day scholar	Town	Government employee	Housewife	Yes	1	Given by neighbour's/friends	Keep inside the house compound all the time	Yes	Sometimes	No	No	Yes	No	No	No	No	No	Yes	No	No	No	No	Rabies	Yes	Yes	No	Yes	No	Yes	Yes	No	No	No	Yes	No	No	No	No	Bat	No	No
481	P479	2020-02-12	PMSS	9	B	19	Male	Day scholar	Town	Private/coorporate employee	Housewife	No							No	No	No	No	Yes	No	No	Yes	No	No	No	No		Yes	No	No	No	Yes	No	No	No	No	No	Yes	No	Yes	No	No	Dog	No	No
482	P480	2020-02-12	PMSS	9	B	15	Female	Day scholar	Village	Private/coorporate employee	Housewife	No							No	No	No	No	Yes	No	No	Yes	Yes	No	No	No		Yes	No	No	No	Yes	No	No	No	No	No	No	No	No	No	Yes	Dog	No	No
483	P481	2020-02-12	PMSS	9	B	15	Female	Day scholar	Village	Farmer	Farmer	No							No	No	No	No	Yes	No	No	Yes	Yes	No	No	No		Yes	No	No	No	Yes	No	No	No	No	No	No	No	No	No	Yes	Dog	No	No
484	P482	2020-02-12	PMSS	9	B	14	Female	Day scholar	Town	Private/coorporate employee	Housewife	No							No	No	No	No	Yes	Yes	No	Yes	Yes	No	No	No	Rabies	Yes	Yes	No	No	Yes	Yes	No	No	No	No	No	No	No	No	Yes	Dog	No	No
485	P483	2020-02-12	PMSS	9	B	15	Female	Day scholar	Town	Military (RBP,RBA,RBG)	Housewife	Yes	1	Given by neighbour's/friends	Keep inside the house compound all the time	Yes	Sometimes	Yes	No	No	No	No	Yes	Yes	No	Yes	Yes	Yes	No	No		Yes	No	No	No	No	Yes	No	No	No	No	Yes	No	Yes	No	No	Dog	No	No
486	P484	2020-02-12	PMSS	9	B	16	Male	Day scholar	Town	Military (RBP,RBA,RBG)	Housewife	No							No	Yes	No	No	Yes	Yes	No	Yes	Yes	Yes	No	No		Yes	Yes	No	No	Yes	Yes	Yes	No	No	No	Yes	No	Yes	No	No	Dog	No	No
487	P485	2020-02-12	PMSS	9	B	13	Male	Day scholar	Town	Private/coorporate employee	Housewife	No							No	No	No	No	No	Yes	No	Yes	No	No	No	No		Yes	Yes	No	No	No	No	No	No	No	No	No	No	No	No	Yes	Dog	No	No
488	P486	2020-02-12	PMSS	9	B	16	Female	Day scholar	Town	Military (RBP,RBA,RBG)	Housewife	No							No	No	No	Yes	No	Yes	No	Yes	Yes	No	No	No	Rabies & mange	Yes	Yes	Yes	Yes	Yes	Yes	Yes	No	Yes	Yes	Yes	Yes	Yes	Yes	No	Dog	No	Yes
489	P487	2020-02-12	PMSS	9	B	14	Male	Day scholar	Town	Bussinessman	Housewife	Yes	1	Purchased from outside the country	Keep inside the house compound all the time	Yes	Every year	No	No	No	No	No	Yes	Yes	No	Yes	Yes	No	No	No	Rabies, Canine distemper	No	No	No	No	No	No	No	No	No	No	No	No	No	No	No		No	No
490	P488	2020-02-12	PMSS	9	B	14	Male	Day scholar	Town	Bussinessman	Housewife	No							No	No	No	No	Yes	Yes	No	No	No	Yes	No	No	Rabies	Yes	No	No	Yes	No	Yes	No	No	Yes	No	No	No	No	Yes	No	Dog	No	No
491	P489	2020-02-12	PMSS	9	B	15	Male	Day scholar	Town	Military (RBP,RBA,RBG)	Housewife	No							No	No	No	No	Yes	Yes	No	Yes	Yes	No	No	No	Rabies	Yes	Yes	No	No	No	Yes	No	No	No	No	No	Yes	No	Yes	No	Dog	No	No
492	P490	2020-02-12	PMSS	9	B	15	Female	Day scholar	Town	Military (RBP,RBA,RBG)	Housewife	No							No	No	No	No	No	Yes	No	Yes	No	No	No	No	Rabies & mange	Yes	No	No	No	No	Yes	No	No	No	No	No	No	No	No	Yes	Dog	No	No
493	P491	2020-02-12	PMSS	9	B	15	Male	Day scholar	Town	Military (RBP,RBA,RBG)	Housewife	Yes	1	Given by neighbour's/friends	Let it roam freely outside during daytime	Yes	Sometimes	No	Yes	Yes	No	No	No	No	No	Yes	Yes	No	No	No	Rabies	Yes	Yes	No	Yes	Yes	No	Yes	No	No	No	Yes	No	No	No	No	Dog	No	No
494	P492	2020-02-12	PMSS	9	B	14	Male	Day scholar	Town	Military (RBP,RBA,RBG)	Housewife	No							No	No	No	No	No	Yes	No	Yes	No	No	No	No	cough	Yes	No	No	No	No	Yes	No	No	No	No	No	No	No	No	Yes	Dog	No	No
495	P493	2020-02-12	PMSS	9	B	15	Female	Day scholar	Town	Government employee	Housewife	Yes	3	Given by neighbour's/friends	Keep inside the house compound all the time	Yes	Every year	Yes	No	No	No	No	No	Yes	No	Yes	No	No	No	No		Yes	No	No	Yes	No	No	No	No	No	No	Yes	No	No	No	No	Dog	No	No
496	P494	2020-02-12	PMSS	9	B	13	Female	Day scholar	Town	Private/coorporate employee	Government employee	No							No	No	No	No	Yes	No	No	Yes	No	No	No	No	Rabies	Yes	No	No	Yes	No	No	No	No	No	No	No	No	No	No	Yes	Dog	No	No
497	P495	2020-02-12	PMSS	9	C	14	Female	Day scholar	Town	Military (RBP,RBA,RBG)	Housewife	Yes	1	Given by neighbour's/friends	Keep inside the house compound all the time	Yes	Every year	Yes	No	No	No	Yes	Yes	No	No	Yes	Yes	No	No	No	Rabies	Yes	Yes	No	No	Yes	Yes	No	No	No	No	No	Yes	No	No	No	Dog	No	No
498	P496	2020-02-12	PMSS	9	C	15	Female	Day scholar	Town	Government employee	Housewife	No							Yes	No	No	No	Yes	Yes	No	Yes	Yes	No	No	No		Yes	Yes	No	No	Yes	Yes	No	No	No	No	No	No	No	No	Yes	Dog	No	No
499	P497	2020-02-12	PMSS	9	C	15	Male	Day scholar	Town	Private/coorporate employee	Government employee	No							No	No	No	No	No	Yes	No	Yes	No	No	No	No	Rabies	Yes	Yes	No	No	No	No	No	No	No	No	Yes	No	No	No	No	Bat	No	No
500	P498	2020-02-12	PMSS	9	C	14	Male	Day scholar	Town	Military (RBP,RBA,RBG)	Housewife	No							Yes	No	No	No	Yes	No	No	Yes	Yes	No	No	No	Rabies & mange	Yes	Yes	No	Yes	No	Yes	Yes	No	No	No	Yes	No	Yes	No	No	I don't know	Yes	No
501	P499	2020-02-12	PMSS	9	C	14	Male	Day scholar	Town	Military (RBP,RBA,RBG)	Housewife	Yes	1	Given by neighbour's/friends	Let it roam freely outside during daytime	I don't know	I don't know	Yes	Yes	Yes	No	No	No	No	No	Yes	Yes	No	No	No	Rabies & mange	Yes	Yes	No	Yes	Yes	Yes	Yes	No	Yes	No	Yes	No	Yes	Yes	No	Dog	No	No
502	P500	2020-02-12	PMSS	9	C	17	Male	Day scholar	Village	Farmer	Farmer	No							Yes	Yes	No	No	No	Yes	No	Yes	Yes	No	No	No	Rabies & mange	Yes	Yes	Yes	No	Yes	Yes	Yes	No	No	No	No	No	No	No	Yes	Dog	No	No
503	P501	2020-02-12	PMSS	9	C	15	Female	Day scholar	Town	Bussinessman	Housewife	Yes	3	Adopted from street	Keep inside the house compound all the time	Yes	Every year	Yes	No	Yes	No	No	Yes	Yes	No	Yes	Yes	No	No	No	Rabies, vomiting	Yes	Yes	No	Yes	Yes	Yes	Yes	No	No	No	Yes	No	Yes	Yes	No	Dog	No	No
504	P502	2020-02-12	PMSS	9	C	15	Male	Day scholar	Town	Bussinessman	Bussinesswomen	No							No	No	No	No	Yes	No	No	Yes	No	No	No	No	Rabies	Yes	Yes	No	No	No	No	No	No	Yes	No	No	No	No	No	No	Dog	No	No
505	P503	2020-02-12	PMSS	9	C	14	Male	Day scholar	Town	Bussinessman	Bussinesswomen	Yes	1	Purchased from other people in Bhutan	Keep inside the house compound all the time	Yes	Every year	I don't know	No	No	No	Yes	No	No	No	No	Yes	No	No	No	Rabies	Yes	No	No	No	No	No	Yes	No	No	No	No	No	No	No	Yes	Dog	No	No
506	P504	2020-02-12	PMSS	9	C	14	Male	Day scholar	Town	Government employee	Government employee	No							No	No	No	No	Yes	Yes	No	No	Yes	No	No	No		Yes	Yes	Yes	Yes	No	No	No	No	No	No	Yes	No	No	Yes	No	Bat	Yes	No
507	P505	2020-02-12	PMSS	9	C	14	Male	Day scholar	Town	Government employee	Housewife	No							No	No	No	Yes	No	No	No	Yes	No	No	No	No	Rabies	Yes	No	No	No	Yes	No	No	No	No	No	Yes	No	No	No	No	Dog	No	No
508	P506	2020-02-12	PMSS	9	C	15	Female	Day scholar	Town	Military (RBP,RBA,RBG)	Housewife	No							No	No	No	No	No	Yes	No	Yes	Yes	No	No	No	Rabies & mange	Yes	Yes	No	Yes	Yes	Yes	No	No	Yes	No	Yes	Yes	No	Yes	No	Dog	No	No
509	P507	2020-02-12	PMSS	9	C	15	Female	Day scholar	Town	Private/coorporate employee	Housewife	Yes	1	Given by neighbour's/friends	Keep inside the house compound all the time	No		No	No	No	No	No	Yes	Yes	No	Yes	Yes	Yes	No	No	Rabies & mange	Yes	Yes	Yes	Yes	Yes	Yes	Yes	No	No	No	Yes	Yes	Yes	Yes	No	Dog	No	No
510	P508	2020-02-12	PMSS	9	C	14	Female	Day scholar	Town	Government employee	Bussinesswomen	No							No	No	No	No	Yes	Yes	Yes	Yes	No	No	No	No	Rabies	Yes	Yes	No	Yes	No	Yes	No	No	Yes	No	Yes	No	Yes	No	No	Dog	No	No
511	P509	2020-02-12	PMSS	9	C	15	Female	Day scholar	Town	Bussinessman	Government employee	No							No	Yes	No	No	Yes	Yes	No	Yes	Yes	No	No	No	Rabies & mange	Yes	Yes	No	Yes	Yes	Yes	Yes	No	No	No	Yes	No	Yes	Yes	No	Dog	No	No
512	P510	2020-02-12	PMSS	9	C	14	Female	Day scholar	Town	Others(Specify)...........	Housewife	No							No	No	Yes	No	No	Yes	No	Yes	Yes	Yes	No	No	Rabies	No	No	No	No	No	No	No	No	No	No	No	No	No	No	No		No	No
513	P511	2020-02-12	PMSS	9	C	13	Male	Day scholar	Town	Military (RBP,RBA,RBG)	Government employee	Yes	1	Given by neighbour's/friends	Free roaming all the time	Yes	I don't know	I don't know	Yes	No	Yes	Yes	Yes	No	No	Yes	Yes	No	No	No	Rabies & mange	Yes	Yes	Yes	Yes	Yes	Yes	No	No	No	No	Yes	Yes	Yes	No	No	Dog	Yes	No
514	P512	2020-02-12	PMSS	9	C	15	Male	Day scholar	Town	Military (RBP,RBA,RBG)	Housewife	No							No	No	No	No	Yes	Yes	No	Yes	Yes	No	No	No	Rabies & mange	Yes	Yes	No	Yes	No	Yes	Yes	No	No	No	No	No	No	No	Yes	Dog	No	No
515	P512	2020-02-12	PMSS	9	C	14	Female	Day scholar	Town	Private/coorporate employee	Housewife	No							No	No	No	No	Yes	Yes	No	Yes	Yes	No	No	No	Rabies	Yes	Yes	No	Yes	Yes	Yes	Yes	No	No	No	No	No	No	No	Yes	Dog	No	No
516	P513	2020-02-12	PMSS	9	C	15	Female	Day scholar	Town	Private/coorporate employee	Housewife	No							No	Yes	No	Yes	Yes	No	No	Yes	Yes	No	No	No	Rabies	Yes	Yes	Yes	No	Yes	Yes	No	No	No	No	No	Yes	No	Yes	No	Dog	No	No
517	P514	2020-02-12	PMSS	9	C	16	Female	Day scholar	Town	Private/coorporate employee	Housewife	No							No	Yes	Yes	No	Yes	Yes	No	Yes	Yes	No	No	No		Yes	Yes	No	Yes	Yes	Yes	No	No	No	No	No	No	No	No	Yes	Dog	No	No
518	P515	2020-02-12	PMSS	9	C	15	Male	Day scholar	Town	Government employee	Housewife	No							No	Yes	Yes	Yes	Yes	Yes	No	Yes	Yes	No	No	No	Rabies & mange	Yes	Yes	No	Yes	No	Yes	Yes	No	No	No	No	No	No	No	Yes	I don't know	No	No
519	P520	2020-02-12	PMSS	9	C	16	Female	Day scholar	Town	Military (RBP,RBA,RBG)	Housewife	No							No	No	No	No	Yes	Yes	No	Yes	Yes	Yes	No	No	Rabies & mange	Yes	Yes	Yes	Yes	Yes	Yes	Yes	No	No	No	No	No	No	No	Yes	Dog	No	No
520	P517	2020-02-12	PMSS	9	C	14	Female	Day scholar	Town	Military (RBP,RBA,RBG)	Housewife	No							No	Yes	Yes	No	Yes	Yes	No	Yes	No	Yes	No	No	Rabies	Yes	Yes	No	Yes	Yes	Yes	No	No	No	No	No	No	No	No	Yes	Dog	No	No
521	P518	2020-02-12	PMSS	9	C	14	Male	Day scholar	Town	Private/coorporate employee	Housewife	No							No	No	No	No	No	Yes	No	Yes	Yes	Yes	No	No		Yes	Yes	No	No	No	No	No	No	No	No	Yes	No	No	No	No	Dog	No	No
522	P519	2020-02-12	PMSS	9	C	14	Male	Day scholar	Town	Military (RBP,RBA,RBG)	Housewife	No							No	No	No	No	Yes	Yes	No	Yes	No	Yes	No	No	Rabies	Yes	No	No	Yes	No	No	No	No	No	No	Yes	No	No	No	No	Bat	Yes	No
523	P520	2020-02-12	PMSS	9	C	14	Male	Day scholar	Town	Government employee	Housewife	No							No	No	No	No	Yes	Yes	No	Yes	Yes	No	No	No	Rabies & mange	Yes	Yes	Yes	Yes	Yes	Yes	Yes	No	No	No	Yes	No	Yes	No	No	Dog	No	No
524	P521	2020-02-12	PMSS	9	C	14	Male	Day scholar	Town	Military (RBP,RBA,RBG)	Housewife	No							No	No	No	Yes	No	Yes	No	Yes	Yes	No	No	No		Yes	Yes	Yes	Yes	Yes	No	No	No	No	No	Yes	Yes	No	No	No	Bat	Yes	No
525	P522	2020-02-12	PMSS	9	C	14	Female	Day scholar	Town	Government employee	Government employee	No							No	No	No	No	Yes	Yes	No	Yes	No	No	No	No	Rabies & mange	Yes	Yes	No	No	No	Yes	No	No	No	No	No	No	Yes	No	No	Dog	No	No
526	P523	2020-02-12	PMSS	9	C	15	Female	Day scholar	Town	Military (RBP,RBA,RBG)	Housewife	No							No	Yes	No	No	Yes	Yes	No	Yes	No	No	No	No	Rabies	Yes	Yes	Yes	No	No	No	No	No	No	No	No	No	Yes	Yes	No	Dog	No	No
527	P524	2020-02-12	PMSS	9	C	14	Male	Day scholar	Town	Others(Specify)...........	Bussinesswomen	No							No	No	No	No	No	Yes	No	Yes	No	No	No	No	Rabies & mange	Yes	Yes	No	No	No	No	No	No	No	No	Yes	No	No	No	No	Dog	No	No
528	P525	2020-02-12	PMSS	9	D	14	Female	Day scholar	Town	Military (RBP,RBA,RBG)	Housewife	Yes	1	I don't know	Keep inside the house compound all the time	Yes	Every year	Yes	No	Yes	No	No	No	Yes	No	Yes	No	No	No	No	Rabies	Yes	Yes	No	No	No	No	No	No	Yes	No	No	No	No	No	No	Dog	No	No
529	P526	2020-02-12	PMSS	9	D	16	Female	Day scholar	Village	Bussinessman	Bussinesswomen	Yes	1	Given by neighbour's/friends	Keep inside the house compound all the time	Yes	Every year	No	No	No	No	No	No	Yes	No	Yes	No	No	No	No	Rabies, Canine distemper	Yes	Yes	No	No	No	Yes	Yes	No	No	No	Yes	Yes	Yes	No	No	Dog	No	No
530	P527	2020-02-12	PMSS	9	D	15	Male	Day scholar	Town	Government employee	Government employee	No							No	No	No	No	No	Yes	Yes	Yes	No	No	No	No		Yes	Yes	No	No	No	Yes	Yes	No	No	No	No	No	Yes	Yes	No	Dog	No	No
531	P528	2020-02-12	PMSS	9	D	15	Female	Day scholar	Town	Private/coorporate employee	Housewife	Yes	1	Purchased from outside the country	Keep inside the house compound all the time	I don't know	I don't know	I don't know	No	No	No	No	No	Yes	No	Yes	No	No	No	No		Yes	No	No	No	No	No	No	Yes	No	No	No	No	No	No	Yes	Dog	No	No
532	P529	2020-02-12	PMSS	9	D	15	Female	Day scholar	Town	Government employee	Private/coorporate employee	No							No	Yes	Yes	Yes	Yes	Yes	No	Yes	Yes	No	No	No	Rabies	Yes	Yes	No	No	No	Yes	Yes	No	No	No	Yes	No	No	No	No	Dog	No	No
533	P530	2020-02-12	PMSS	9	D	17	Male	Day scholar	Town	Private/coorporate employee	Housewife	No							No	No	No	No	Yes	No	No	Yes	Yes	No	No	No	Rabies	Yes	Yes	No	Yes	Yes	Yes	Yes	No	No	No	No	No	No	Yes	No	Dog	No	No
534	P531	2020-02-12	PMSS	9	D	14	Female	Day scholar	Town	Government employee	Government employee	No							Yes	No	No	No	Yes	Yes	No	Yes	Yes	No	No	No	Rabies	Yes	Yes	No	No	No	No	Yes	No	Yes	No	No	No	No	Yes	No	Dog	No	No
535	P532	2020-02-12	PMSS	9	D	14	Male	Day scholar	Town	Private/coorporate employee	Housewife	No							No	No	No	No	Yes	No	No	Yes	No	No	No	No	Rabies	Yes	No	No	No	Yes	No	No	No	No	No	No	Yes	No	No	No	Dog	No	No
536	P533	2020-02-12	PMSS	9	D	14	Male	Day scholar	Town	Private/coorporate employee	Housewife	Yes	1	I don't know	Free roaming all the time	Yes	Every year	No	No	No	No	No	Yes	Yes	No	Yes	Yes	No	No	No	Rabies	Yes	No	No	Yes	No	No	No	No	No	No	No	No	No	No	Yes	Dog	No	No
537	P534	2020-02-12	PMSS	9	D	14	Male	Day scholar	Town	Private/coorporate employee	Housewife	No							No	No	No	No	Yes	Yes	No	Yes	Yes	No	No	No	Rabies	Yes	No	No	Yes	No	Yes	Yes	No	No	No	Yes	No	Yes	No	No	Dog	No	No
538	P535	2020-02-12	PMSS	9	D	16	Female	Day scholar	Village	Farmer	Farmer	No							No	No	No	Yes	No	Yes	No	Yes	Yes	No	No	No	Rabies	Yes	No	No	No	No	Yes	Yes	No	No	No	No	No	No	No	Yes	Dog	No	No
539	P536	2020-02-12	PMSS	9	D	15	Female	Day scholar	Town	Government employee	Government employee	No							No	No	Yes	No	No	Yes	No	Yes	Yes	Yes	No	No	Rabies	Yes	Yes	No	No	Yes	No	No	No	Yes	No	Yes	No	No	No	No	Dog	No	No
540	P537	2020-02-12	PMSS	9	D	15	Male	Day scholar	Town	Government employee	Housewife	No							No	No	No	No	No	Yes	No	Yes	Yes	No	No	No	Rabies	Yes	Yes	No	Yes	Yes	No	Yes	No	No	No	Yes	No	No	No	No	Dog	No	No
541	P538	2020-02-12	PMSS	9	D	14	Male	Day scholar	Town	Private/coorporate employee	Government employee	No							No	No	No	No	No	Yes	No	Yes	No	No	No	No	Rabies	Yes	No	No	Yes	No	No	No	No	No	No	No	No	No	No	Yes	Dog	No	No
542	P539	2020-02-12	PMSS	9	D	15	Male	Day scholar	Town	Private/coorporate employee	Bussinesswomen	No							No	No	No	No	No	Yes	No	Yes	No	No	No	No		Yes	No	No	No	Yes	No	No	No	No	No	Yes	No	No	No	No	Dog	No	No
543	P540	2020-02-12	PMSS	9	D	14	Female	Day scholar	Town	Bussinessman	Bussinesswomen	No							No	No	No	No	No	Yes	No	Yes	No	No	No	No	Rabies	Yes	Yes	No	No	No	No	No	No	No	No	No	No	Yes	No	No	Dog	No	No
544	P541	2020-02-12	PMSS	9	D	14	Female	Day scholar	Town	Private/coorporate employee	Private/coorporate employee	No							No	No	No	No	Yes	Yes	No	Yes	Yes	No	No	No	Rabies	Yes	No	No	No	No	Yes	Yes	No	No	No	No	No	No	No	Yes	Dog	No	No
545	P542	2020-02-12	PMSS	9	D	16	Female	Day scholar	Town	Private/coorporate employee	Housewife	No							No	No	No	No	Yes	No	No	Yes	No	No	No	No	Rabies	Yes	Yes	No	No	No	No	No	No	No	No	Yes	No	No	No	No	Dog	No	No
546	P543	2020-02-12	PMSS	9	D	13	Male	Day scholar	Town	Government employee	Government employee	No							No	No	No	No	Yes	No	No	Yes	No	No	No	No	Rabies	Yes	Yes	No	No	No	Yes	No	No	No	No	No	No	Yes	No	No	Dog	No	No
547	P544	2020-02-12	PMSS	9	D	15	Male	Day scholar	Town	Bussinessman	Housewife	No							No	No	No	No	Yes	No	No	Yes	No	No	No	No	Rabies	Yes	Yes	No	No	No	Yes	No	No	No	No	No	No	No	No	Yes	I don't know	No	No
548	P545	2020-02-12	PMSS	9	D	14	Male	Day scholar	Town	Military (RBP,RBA,RBG)	Housewife	Yes	1	Given by neighbour's/friends	Free roaming all the time	I don't know	I don't know	I don't know	No	No	No	No	Yes	No	No	Yes	No	No	No	No	Rabies	Yes	Yes	No	No	No	Yes	No	No	Yes	No	Yes	No	No	No	No	Dog	No	No
549	P546	2020-02-12	PMSS	9	D	16	Male	Day scholar	Town	Government employee	Others(Specify)................	No							No	No	No	Yes	Yes	No	No	Yes	No	No	No	No	Rabies	Yes	No	No	No	No	Yes	No	No	No	No	No	No	Yes	No	No	Dog	No	No
550	P547	2020-02-12	PMSS	9	D	14	Female	Day scholar	Town	Private/coorporate employee	Housewife	Yes	1	Given by neighbour's/friends	Keep inside the house compound all the time	Yes	Every year	I don't know	No	No	No	No	No	Yes	No	Yes	No	No	No	No		Yes	Yes	No	No	No	No	No	No	No	No	Yes	No	No	No	No	Dog	No	No
551	P548	2020-02-12	PMSS	9	D	13	Female	Day scholar	Town	Private/coorporate employee	Housewife	No							No	No	No	Yes	Yes	No	No	Yes	Yes	No	No	No	Rabies	Yes	No	No	No	No	Yes	Yes	No	No	No	No	No	No	No	Yes	Dog	No	No
552	P549	2020-02-12	PMSS	9	D	14	Female	Day scholar	Village	Private/coorporate employee	Housewife	Yes	1	Purchased from other people in Bhutan	Keep inside the house compound all the time	I don't know	I don't know	I don't know	No	No	No	Yes	Yes	Yes	No	Yes	No	No	No	No	Rabies	Yes	No	No	No	No	Yes	No	No	No	No	No	No	No	No	Yes	Dog	No	No
553	P550	2020-02-12	PMSS	9	D	15	Male	Day scholar	Town	Military (RBP,RBA,RBG)	Others(Specify)................	No							No	No	No	No	No	Yes	No	No	Yes	No	No	No		Yes	No	No	Yes	No	No	No	No	Yes	No	No	No	No	No	No	Dog	No	No
554	P551	2020-02-12	PMSS	9	D	16	Male	Day scholar	Town	Government employee	Housewife	No							No	No	No	No	Yes	Yes	No	Yes	No	No	No	No	Rabies	Yes	No	No	Yes	No	Yes	No	No	No	No	Yes	Yes	Yes	Yes	No	Bat	Yes	No
555	P552	2020-02-12	PMSS	9	D	18	Male	Day scholar	Town	Private/coorporate employee	Housewife	Yes	3	Adopted from street	Free roaming all the time	No		I don't know	No	No	No	No	No	Yes	No	Yes	No	No	No	No		Yes	Yes	No	No	No	No	No	No	Yes	No	No	No	No	No	No	Dog	No	No
556	P553	2020-02-12	PMSS	9	D	16	Male	Day scholar	Town	Private/coorporate employee	Housewife	No							No	No	No	No	No	Yes	No	Yes	No	No	No	No	y	Yes	No	No	Yes	No	No	No	No	No	No	Yes	No	No	No	No	Dog	No	No
557	P554	2020-02-12	PMSS	9	D	14	Female	Day scholar	Town	Others(Specify)...........	Bussinesswomen	No							No	Yes	No	No	No	Yes	No	Yes	No	No	No	No	Rabies	Yes	Yes	No	No	No	Yes	No	No	No	No	No	No	No	No	Yes	Dog	Yes	No
558	P555	2020-02-12	PMSS	9	D	14	Female	Day scholar	Town	Bussinessman	Bussinesswomen	No							No	Yes	No	No	Yes	Yes	No	Yes	Yes	Yes	No	No	Rabies	Yes	Yes	No	No	No	Yes	No	No	No	No	No	No	No	No	Yes	Dog	Yes	No
559	P556	2020-02-12	PMSS	9	D	15	Female	Day scholar	Village	Farmer	Farmer	No							No	No	No	No	Yes	Yes	No	Yes	Yes	No	No	No	Rabies	Yes	Yes	No	No	Yes	Yes	No	No	No	No	Yes	No	No	No	No	Dog	No	No
560	P557	2020-02-12	PMSS	9	D	14	Female	Day scholar	Town	Military (RBP,RBA,RBG)	Housewife	Yes	1	Given by neighbour's/friends	Keep inside the house compound all the time	Yes	Sometimes	No	No	No	Yes	No	No	No	No	Yes	No	No	No	No	Rabies	Yes	Yes	No	No	No	No	No	No	Yes	No	No	Yes	No	No	No	Dog	No	No
561	P558	2020-02-12	PMSS	8	D	14	Female	Day scholar	Town	Bussinessman	Government employee	No							No	No	No	No	No	Yes	No	Yes	No	No	No	No	Rabies	Yes	No	No	No	No	No	No	Yes	No	No	No	No	No	No	Yes	Dog	No	No
562	P559	2020-02-12	PMSS	9	D	13	Female	Day scholar	Town	Bussinessman	Bussinesswomen	No							No	No	No	No	Yes	Yes	No	Yes	Yes	No	No	No	Rabies	Yes	Yes	No	No	No	Yes	No	No	No	No	No	No	No	No	Yes	Dog	No	No
563	P560	2020-02-12	PMSS	9	D	13	Female	Day scholar	Town	Government employee	Housewife	No							No	No	No	No	No	Yes	No	Yes	No	No	No	No	Rabies	Yes	No	No	No	No	Yes	No	No	No	No	No	No	No	No	Yes	I don't know	No	No
564	P561	2020-02-12	PMSS	9	D	14	Female	Day scholar	Town	Private/coorporate employee	Housewife	No							No	No	No	No	Yes	Yes	No	Yes	Yes	No	No	No	Rabies	Yes	Yes	Yes	No	No	No	No	No	No	No	No	No	Yes	Yes	No	Dog	No	No
565	P562	2020-02-12	PMSS	9	D	14	Female	Day scholar	Town	Military (RBP,RBA,RBG)	Housewife	No							No	No	No	No	Yes	Yes	No	Yes	No	No	No	Yes	Rabies	Yes	Yes	No	No	Yes	Yes	No	No	Yes	No	No	Yes	No	No	No	Dog	No	No
566	P563	2020-02-12	PMSS	9	D	14	Female	Day scholar	Town	Private/coorporate employee	Housewife	No							No	No	No	No	Yes	Yes	No	Yes	Yes	No	No	No	Rabies	Yes	No	No	No	No	No	Yes	No	No	No	No	No	No	No	Yes	Dog	No	No
567	P564	2020-02-12	PMSS	10	A	14	Male	Day scholar	Town	Private/coorporate employee	Housewife	Yes	1	Given by neighbour's/friends	Keep inside the house compound all the time	Yes	I don't know	I don't know	No	No	No	No	No	Yes	No	Yes	No	No	No	No	Mange, scabies, rabies, ectoparasites	Yes	Yes	No	No	No	No	Yes	No	No	No	No	No	Yes	No	No	Dog	No	No
568	P565	2020-02-12	PMSS	10	A	15	Male	Day scholar	Town	Government employee	Housewife	Yes	1	Given by neighbour's/friends	Free roaming all the time	Yes	Every year	Yes	No	No	No	Yes	No	Yes	No	Yes	Yes	Yes	No	No		Yes	Yes	No	Yes	Yes	Yes	Yes	No	No	No	Yes	No	Yes	No	No	Dog	No	No
569	P566	2020-02-12	PMSS	10	A	15	Female	Day scholar	Town	Government employee	Government employee	Yes	1	Purchased from outside the country	Let it roam freely outside during daytime	Yes	Every year	Yes	No	No	No	No	No	Yes	No	Yes	No	Yes	No	No	Rabies & mange	Yes	Yes	No	No	Yes	Yes	Yes	No	No	No	Yes	Yes	Yes	No	No	Dog	No	No
570	P567	2020-02-12	PMSS	10	A	16	Female	Day scholar	Town	Military (RBP,RBA,RBG)	Housewife	No							No	No	No	Yes	Yes	No	No	Yes	Yes	No	No	No	Rabies & mange	Yes	Yes	No	No	No	Yes	No	No	No	No	No	No	Yes	Yes	No	Dog	No	No
571	P568	2020-02-12	PMSS	10	A	15	Female	Day scholar	Town	Private/coorporate employee	Government employee	No							No	No	Yes	No	Yes	Yes	No	Yes	Yes	No	No	No	Rabies & mange	Yes	Yes	No	Yes	No	Yes	No	No	No	No	No	Yes	Yes	Yes	No	Dog	No	No
572	P569	2020-02-12	PMSS	10	A	15	Male	Day scholar	Town	Government employee	Private/coorporate employee	No							No	Yes	Yes	Yes	Yes	Yes	No	Yes	Yes	Yes	No	No	Rabies & mange	No	No	No	No	No	No	No	No	No	No	No	No	No	No	No		No	No
573	P570	2020-02-12	PMSS	10	A	14	Female	Day scholar	Town	Government employee	Private/coorporate employee	No							No	No	No	No	Yes	Yes	No	Yes	Yes	No	No	No	Rabies & mange	Yes	Yes	No	Yes	Yes	Yes	Yes	No	No	No	Yes	Yes	Yes	No	No	Dog	No	No
574	P571	2020-02-12	PMSS	10	A	15	Male	Day scholar	Town	Military (RBP,RBA,RBG)	Housewife	Yes	1	Given by neighbour's/friends	Keep inside the house compound all the time	Yes	Every year	No	No	No	No	No	No	Yes	No	Yes	No	No	No	No	Rabies	Yes	Yes	No	No	Yes	No	Yes	No	Yes	No	No	No	No	No	No	Dog	No	No
575	P572	2020-02-12	PMSS	10	A	15	Male	Day scholar	Town	Private/coorporate employee	Government employee	Yes	1	Given by neighbour's/friends	Keep inside the house compound all the time	I don't know	I don't know	Yes	No	No	No	No	Yes	Yes	No	Yes	No	No	No	No	Rabies. scabies, ectoparasite	Yes	No	No	No	Yes	Yes	Yes	No	Yes	No	No	Yes	Yes	No	No	Dog	No	No
576	P573	2020-02-12	PMSS	10	A	16	Male	Day scholar	Town	Military (RBP,RBA,RBG)	Housewife	No							No	Yes	No	Yes	No	Yes	No	Yes	Yes	Yes	No	No	Rabies	Yes	Yes	Yes	No	Yes	Yes	Yes	No	Yes	No	Yes	No	No	No	No	Dog	No	Yes
577	P574	2020-02-12	PMSS	10	A	15	Male	Day scholar	Town	Government employee	Housewife	No							No	No	No	No	Yes	Yes	No	Yes	No	Yes	No	No		Yes	Yes	No	Yes	No	No	Yes	No	Yes	No	Yes	No	Yes	No	No	Dog	No	No
578	P575	2020-02-12	PMSS	10	A	15	Male	Day scholar	Town	Military (RBP,RBA,RBG)	Housewife	No							No	No	No	No	Yes	Yes	No	Yes	No	No	No	No	Rabies	Yes	Yes	No	No	Yes	No	Yes	No	No	No	No	No	No	No	Yes	Dog	No	No
579	P576	2020-02-12	PMSS	10	A	14	Male	Day scholar	Town	Private/coorporate employee	Government employee	No							No	No	No	Yes	Yes	No	No	Yes	No	No	No	No	Mange	Yes	Yes	No	No	Yes	Yes	Yes	No	No	No	No	No	Yes	Yes	No	Dog	No	No
580	P577	2020-02-12	PMSS	10	A	15	Male	Day scholar	Town	Military (RBP,RBA,RBG)	Housewife	No							No	No	No	No	Yes	Yes	No	Yes	Yes	No	No	No	Rabies	Yes	No	No	No	No	Yes	No	No	Yes	No	Yes	No	No	No	No	I don't know	No	No
581	P578	2020-02-12	PMSS	10	A	19	Male	Day scholar	Town	Military (RBP,RBA,RBG)	Housewife	Yes	1	Given by neighbour's/friends	Keep inside the house compound all the time	Yes	Every year	No	No	No	No	No	No	Yes	No	Yes	No	No	No	No	Rabies	Yes	No	No	No	Yes	No	No	No	Yes	No	No	No	No	No	No	Dog	No	No
582	P579	2020-02-12	PMSS	10	A	14	Female	Day scholar	Town	Military (RBP,RBA,RBG)	Housewife	No							No	No	No	No	Yes	Yes	No	Yes	Yes	No	No	No	Rabies & mange	Yes	Yes	No	Yes	No	Yes	Yes	No	No	No	Yes	No	Yes	No	No	Dog	No	No
583	P580	2020-02-12	PMSS	10	A	16	Female	Day scholar	Town	Government employee	Private/coorporate employee	Yes	1	Given by neighbour's/friends	Let it roam freely outside during daytime	Yes	Every year	Yes	No	No	No	No	Yes	Yes	No	Yes	Yes	Yes	No	No	Rabies & mange	Yes	Yes	Yes	No	Yes	No	Yes	No	Yes	No	Yes	No	Yes	No	No	Dog	No	No
584	P581	2020-02-12	PMSS	10	A	16	Female	Day scholar	Village	Farmer	Farmer	No							Yes	No	No	No	Yes	No	No	Yes	No	No	No	No	Rabies	Yes	No	No	No	Yes	Yes	No	No	No	No	No	No	No	No	Yes	Dog	No	No
585	P582	2020-02-12	PMSS	10	A	17	Female	Day scholar	Town	Military (RBP,RBA,RBG)	Housewife	Yes	1	Given by neighbour's/friends	Keep inside the house compound all the time	Yes	Every year	No	No	Yes	No	No	No	Yes	No	Yes	Yes	No	No	No	Rabies	Yes	Yes	No	Yes	No	Yes	Yes	No	Yes	No	No	No	Yes	No	No	Dog	No	No
586	P583	2020-02-12	PMSS	10	A	16	Female	Day scholar	Town	Private/coorporate employee	Private/coorporate employee	No							Yes	No	No	Yes	Yes	Yes	No	Yes	Yes	Yes	No	No	Rabies & mange	Yes	Yes	Yes	Yes	Yes	Yes	Yes	No	No	No	Yes	Yes	Yes	Yes	No	Dog	No	No
587	P584	2020-02-12	PMSS	10	A	14	Female	Day scholar	Town	Government employee	Government employee	Yes	1	Given by neighbour's/friends	Keep inside the house compound all the time	Yes	Every year	Yes	No	No	No	Yes	Yes	Yes	No	Yes	Yes	No	No	No	Rabies & mange	Yes	Yes	Yes	Yes	Yes	Yes	Yes	No	No	No	Yes	Yes	Yes	No	Yes	Dog	No	No
588	P585	2020-02-12	PMSS	10	A	15	Female	Day scholar	Town	Farmer	Farmer	No							No	No	No	No	No	Yes	No	Yes	Yes	No	No	No	Rabies & mange	Yes	Yes	No	Yes	Yes	Yes	No	No	Yes	No	No	No	No	No	No	Dog	Yes	No
589	P586	2020-02-12	PMSS	10	A	15	Female	Day scholar	Town	Bussinessman	Bussinesswomen	Yes	1	Purchased from other people in Bhutan	Keep inside the house compound all the time	Yes	Sometimes	Yes	No	Yes	No	No	Yes	Yes	No	Yes	Yes	No	Yes	No	Rabies,mange,malnutrition	Yes	No	No	Yes	Yes	Yes	Yes	No	No	No	Yes	No	Yes	Yes	No	Bat	Yes	No
590	P587	2020-02-12	PMSS	10	A	19	Male	Day scholar	Town	Military (RBP,RBA,RBG)	Housewife	Yes	1	Given by neighbour's/friends	Keep inside the house compound all the time	Yes	Every year	Yes	No	No	No	No	No	Yes	No	Yes	Yes	No	No	No	Rabies	Yes	Yes	Yes	No	No	No	No	No	Yes	No	Yes	No	Yes	Yes	No	Dog	No	No
591	P588	2020-02-12	PMSS	10	A	15	Female	Day scholar	Town	Military (RBP,RBA,RBG)	Others(Specify)................	No							No	Yes	No	No	No	Yes	No	Yes	Yes	No	No	No		Yes	Yes	No	Yes	No	Yes	No	No	Yes	No	Yes	No	Yes	No	No	Dog	Yes	No
592	P589	2020-02-12	PMSS	10	A	15	Female	Day scholar	Town	Government employee	Housewife	No							No	No	No	No	Yes	No	No	Yes	No	No	No	No	Rabies & mange	Yes	Yes	No	Yes	No	Yes	Yes	No	Yes	No	Yes	No	Yes	No	No	Dog	No	No
593	P590	2020-02-12	PMSS	10	A	15	Female	Day scholar	Town	Military (RBP,RBA,RBG)	Housewife	Yes	1	Given by neighbour's/friends	Keep inside the house compound all the time	Yes	Every year	No	No	Yes	No	No	No	No	No	No	Yes	No	No	No	Rabies & mange	Yes	Yes	No	No	No	Yes	No	No	No	No	No	Yes	No	Yes	No	Dog	No	No
594	P591	2020-02-12	PMSS	10	A	14	Female	Day scholar	Town	Government employee	Housewife	Yes	1	Purchased from other people in Bhutan	Let it roam freely outside during daytime	Yes	Every year	I don't know	No	No	No	No	Yes	Yes	No	Yes	Yes	No	No	No	Rabies & mange	Yes	Yes	No	Yes	Yes	Yes	Yes	No	No	No	No	No	No	No	Yes	Dog	No	No
595	P592	2020-02-12	PMSS	10	A	16	Female	Day scholar	Town	Military (RBP,RBA,RBG)	Housewife	No							No	No	No	No	No	Yes	No	Yes	Yes	No	No	No	Rabies & mange	Yes	Yes	No	No	Yes	Yes	Yes	No	Yes	No	No	No	Yes	No	No	Dog	No	No
596	P593	2020-02-12	PMSS	10	A	16	Male	Day scholar	Village	Private/coorporate employee	Private/coorporate employee	No							No	Yes	No	No	Yes	Yes	No	No	No	Yes	No	No	Rabies & mange	Yes	Yes	No	No	No	Yes	Yes	No	No	No	Yes	No	Yes	No	No	Bat	Yes	No
597	P594	2020-02-12	PMSS	10	A	15	Female	Day scholar	Village	Private/coorporate employee	Housewife	No							No	No	No	No	Yes	Yes	No	Yes	No	Yes	No	No		Yes	Yes	No	Yes	Yes	Yes	No	No	Yes	No	Yes	No	No	No	No	Dog	No	No
598	P595	2020-02-12	PMSS	10	A	16	Female	Day scholar	Town	Military (RBP,RBA,RBG)	Housewife	No							No	No	No	No	Yes	Yes	No	Yes	Yes	No	No	No		Yes	Yes	No	Yes	Yes	Yes	Yes	No	No	No	Yes	No	Yes	No	No	Bat	Yes	Yes
599	P596	2020-02-12	PMSS	10	A	16	Female	Day scholar	Town	Bussinessman	Bussinesswomen	Yes	1	Purchased from other people in Bhutan	Let it roam freely outside during daytime	Yes	Every year	No	No	Yes	No	Yes	No	Yes	No	Yes	Yes	No	No	No	Rabies & mange	Yes	Yes	No	Yes	Yes	Yes	Yes	No	No	No	Yes	No	Yes	No	No	Bat	Yes	No
600	P597	2020-02-12	PMSS	10	A	14	Male	Day scholar	Town	Private/coorporate employee	Housewife	No							No	No	No	No	No	Yes	No	Yes	Yes	Yes	No	No	Rabies	Yes	Yes	Yes	No	Yes	No	No	No	No	No	No	No	No	No	Yes	Dog	Yes	No
601	P598	2020-02-12	PMSS	10	B	16	Female	Day scholar	Town	Private/coorporate employee	Housewife	Yes	1	Given by neighbour's/friends	Keep inside the house compound all the time	Yes	Every year	No	No	Yes	No	No	No	Yes	No	Yes	Yes	Yes	No	No	Rabies & mange	Yes	Yes	No	Yes	No	Yes	Yes	No	No	No	Yes	Yes	No	No	No	Dog	No	No
602	P599	2020-02-12	PMSS	10	B	15	Female	Day scholar	Village	Private/coorporate employee	Housewife	No							No	Yes	No	Yes	Yes	No	No	Yes	Yes	Yes	No	No	Rabies & mange	Yes	Yes	No	Yes	No	Yes	Yes	No	Yes	No	Yes	No	No	No	No	Dog	No	No
603	P600	2020-02-12	PMSS	10	B	18	Male	Day scholar	Town	Bussinessman	Bussinesswomen	Yes	4	Adopted from street	Let it roam freely outside during daytime	Yes	Sometimes	Yes	No	No	No	No	Yes	Yes	No	Yes	Yes	No	No	No	Mange, hair fall, coughing	Yes	Yes	Yes	Yes	Yes	Yes	Yes	No	No	No	Yes	No	Yes	Yes	No	Bat	Yes	No
604	P601	2020-02-12	PMSS	10	B	15	Male	Day scholar	Town	Military (RBP,RBA,RBG)	Housewife	No							No	Yes	No	Yes	No	Yes	No	Yes	Yes	No	No	No	Rabies & mange	Yes	Yes	No	No	No	Yes	Yes	No	No	No	No	Yes	No	No	No	Dog	No	No
605	P602	2020-02-12	PMSS	10	B	16	Male	Day scholar	Village	Private/coorporate employee	Housewife	No							No	No	No	No	Yes	Yes	No	Yes	No	No	No	No	Rabies & mange	Yes	No	No	Yes	No	No	Yes	No	No	No	Yes	No	Yes	Yes	No	Bat	Yes	No
606	P603	2020-02-12	PMSS	10	B	18	Female	Day scholar	Village	Others(Specify)...........	Others(Specify)................	Yes	1	Given by neighbour's/friends	Keep inside the house compound all the time	Yes	Every year	No	Yes	No	No	Yes	Yes	Yes	No	Yes	Yes	Yes	No	No	Rabies	Yes	Yes	No	Yes	Yes	No	Yes	No	No	No	Yes	Yes	Yes	Yes	No	Dog	No	No
607	P604	2020-02-12	PMSS	10	B	16	Male	Day scholar	Village	Private/coorporate employee	Housewife	No							No	No	No	No	Yes	Yes	No	Yes	No	No	No	No	Rabies & mange	Yes	No	No	Yes	Yes	Yes	No	No	No	No	No	No	Yes	No	No	Dog	No	No
608	P605	2020-02-12	PMSS	10	B	16	Male	Day scholar	Village	Government employee	Housewife	No							No	Yes	Yes	Yes	Yes	No	No	Yes	Yes	Yes	No	No	Rabies & mange	Yes	No	No	Yes	Yes	No	No	No	No	No	Yes	Yes	No	Yes	No	Dog	No	No
609	P606	2020-02-12	PMSS	10	B	17	Female	Day scholar	Village	Military (RBP,RBA,RBG)	Housewife	No							Yes	Yes	No	Yes	Yes	Yes	No	Yes	Yes	No	No	No	Rabies & mange	Yes	Yes	No	Yes	Yes	Yes	Yes	No	No	No	Yes	No	Yes	Yes	No	Birds	Yes	No
610	P607	2020-02-12	PMSS	10	B	17	Female	Day scholar	Village	Farmer	Farmer	Yes	1	Given by neighbour's/friends	Keep inside the house compound all the time	Yes	Every year	Yes	Yes	No	No	No	No	No	No	Yes	No	No	No	No	Rabies	Yes	Yes	No	No	No	No	No	No	No	No	No	No	Yes	No	No	Dog	Yes	No
611	P608	2020-02-12	PMSS	10	B	18	Female	Day scholar	Village	Others(Specify)...........	Housewife	Yes	2	I don't know	Free roaming all the time	No		I don't know	No	Yes	No	No	No	No	No	Yes	Yes	No	No	No	Rabies & mange	Yes	Yes	No	No	No	No	No	No	Yes	No	No	No	No	No	No	Dog	Yes	No
612	P609	2020-02-12	PMSS	10	B	18	Female	Day scholar	Town	Government employee	Housewife	No							No	Yes	No	No	Yes	Yes	No	Yes	No	No	No	No	Rabies & mange	Yes	Yes	No	Yes	No	Yes	Yes	No	Yes	No	Yes	Yes	Yes	No	No	Dog	No	No
613	P610	2020-02-12	PMSS	10	B	16	Male	Day scholar	Village	Military (RBP,RBA,RBG)	Housewife	Yes	5	Given by neighbour's/friends	Keep inside the house compound all the time	Yes	Every year	No	No	No	No	Yes	Yes	Yes	No	Yes	Yes	No	No	No	Rabies & mange	Yes	No	Yes	No	Yes	No	No	No	No	No	No	Yes	No	Yes	No	Dog	No	No
614	P611	2020-02-12	PMSS	10	B	15	Male	Day scholar	Village	Government employee	Government employee	No							Yes	No	No	No	Yes	Yes	No	Yes	Yes	No	No	No	Mange	Yes	Yes	Yes	No	Yes	No	Yes	No	No	No	Yes	No	No	No	No	Dog	No	No
615	P612	2020-02-12	PMSS	10	B	14	Male	Day scholar	Village	Government employee	Government employee	No							No	No	No	Yes	Yes	No	No	Yes	Yes	Yes	No	No	Mange	Yes	Yes	No	Yes	Yes	Yes	Yes	No	No	No	No	No	No	No	Yes	Dog	No	No
616	P613	2020-02-12	PMSS	10	B	15	Male	Day scholar	Village	Private/coorporate employee	Housewife	No							No	No	No	Yes	Yes	Yes	No	Yes	Yes	No	No	No	Rabies & mange	Yes	Yes	No	Yes	Yes	Yes	Yes	No	No	No	Yes	No	Yes	No	No	Dog	No	No
617	P614	2020-02-12	PMSS	10	B	16	Male	Day scholar	Town	Bussinessman	Bussinesswomen	No							No	No	No	Yes	Yes	No	No	Yes	No	Yes	No	No	Rabies & mange	Yes	Yes	No	No	Yes	Yes	Yes	No	No	No	Yes	Yes	Yes	No	No	Dog	No	No
618	P165	2020-02-12	PMSS	10	B	16	Male	Day scholar	Village	Military (RBP,RBA,RBG)	Housewife	Yes	1	Given by neighbour's/friends	Keep inside the house compound all the time	Yes	Every year	I don't know	No	No	No	No	No	Yes	No	Yes	Yes	No	No	No	Rabies & mange	Yes	Yes	No	Yes	Yes	Yes	No	No	Yes	No	Yes	No	Yes	Yes	No	Bat	Yes	No
619	P616	2020-02-12	PMSS	10	B	16	Female	Day scholar	Village	Private/coorporate employee	Housewife	No							No	Yes	No	Yes	No	Yes	No	Yes	Yes	Yes	No	No	Rabies & mange	Yes	Yes	No	No	No	Yes	No	No	No	No	No	No	Yes	No	No	Dog	No	No
620	P617	2020-02-12	PMSS	10	B	15	Female	Day scholar	Village	Others(Specify)...........	Housewife	No							Yes	No	No	No	No	Yes	No	Yes	Yes	No	No	No	Rabies & mange	Yes	Yes	No	No	Yes	Yes	No	No	No	No	No	No	Yes	Yes	No	Dog	No	No
621	P618	2020-02-12	PMSS	10	B	19	Male	Day scholar	Town	Military (RBP,RBA,RBG)	Housewife	No							No	No	No	Yes	Yes	No	No	Yes	Yes	No	No	No	Rabies & mange	Yes	Yes	No	No	Yes	No	No	No	Yes	No	No	No	No	No	No	Dog	Yes	No
622	P619	2020-02-12	PMSS	10	B	18	Male	Day scholar	Town	Military (RBP,RBA,RBG)	Housewife	No							No	No	No	Yes	Yes	Yes	No	Yes	Yes	No	No	No	Rabies & mange	Yes	Yes	No	No	No	Yes	Yes	No	No	No	No	No	No	No	No	Dog	No	No
623	P620	2020-02-12	PMSS	10	B	15	Male	Day scholar	Village	Farmer	Farmer	No							No	No	No	No	Yes	Yes	No	Yes	No	No	No	No	Mange	Yes	Yes	Yes	No	Yes	No	Yes	No	No	No	Yes	No	Yes	No	No	Dog	No	No
624	P621	2020-02-12	PMSS	10	B	14	Female	Day scholar	Town	Private/coorporate employee	Government employee	No							No	Yes	No	Yes	No	Yes	No	Yes	No	Yes	No	No	Rabies & mange	Yes	Yes	Yes	Yes	Yes	Yes	Yes	No	No	No	Yes	No	No	Yes	No	I don't know	No	No
625	P622	2020-02-12	PMSS	10	B	16	Female	Day scholar	Town	Private/coorporate employee	Housewife	Yes	1	Adopted from street	Keep inside the house compound all the time	Yes	Every year	No	No	Yes	No	No	No	Yes	No	Yes	Yes	Yes	No	No	Rabies & mange	Yes	Yes	No	Yes	No	Yes	Yes	No	No	No	Yes	No	No	Yes	No	Dog	No	No
626	P623	2020-02-12	PMSS	10	B	18	Female	Day scholar	Town	Military (RBP,RBA,RBG)	Housewife	No							No	No	No	No	Yes	Yes	No	Yes	Yes	No	No	No	Rabies	Yes	Yes	No	No	Yes	Yes	No	No	No	No	No	No	Yes	Yes	No	Dog	No	Yes
627	P624	2020-02-12	PMSS	10	B	15	Female	Day scholar	Town	Government employee	Housewife	No							No	No	No	No	Yes	Yes	No	Yes	Yes	No	No	No	Rabies	Yes	Yes	No	No	Yes	Yes	No	No	No	No	Yes	No	Yes	Yes	No	Dog	No	Yes
628	P625	2020-02-12	PMSS	10	B	16	Female	Day scholar	Town	Bussinessman	Housewife	No							Yes	No	No	No	Yes	Yes	No	Yes	Yes	No	No	No	Rabies & mange	Yes	No	No	Yes	No	No	No	No	No	No	Yes	No	Yes	Yes	No	I don't know	No	No
629	P626	2020-02-12	PMSS	10	B	14	Female	Day scholar	Town	Military (RBP,RBA,RBG)	Housewife	No							No	Yes	No	No	No	No	No	Yes	Yes	No	No	No	Rabies	Yes	Yes	No	No	Yes	Yes	Yes	No	Yes	No	No	No	No	Yes	No	Dog	Yes	No
630	P627	2020-02-12	PMSS	10	B	14	Female	Day scholar	Town	Bussinessman	Bussinesswomen	Yes	2	Given by neighbour's/friends	Keep inside the house compound all the time	Yes	Every year	Yes	No	Yes	No	Yes	No	Yes	No	Yes	No	Yes	No	No	Rabies & mange	Yes	Yes	Yes	Yes	Yes	Yes	Yes	No	No	No	Yes	No	Yes	No	No	Dog	Yes	No
631	P628	2020-02-12	PMSS	10	B	16	Female	Day scholar	Town	Government employee	Private/coorporate employee	No							No	No	No	No	Yes	Yes	No	Yes	Yes	No	No	No	Rabies, scabies, malnutrition	Yes	Yes	No	No	Yes	Yes	Yes	No	No	No	Yes	No	Yes	No	No	Dog	Yes	No
632	P629	2020-02-12	PMSS	10	B	15	Female	Day scholar	Town	Government employee	Private/coorporate employee	No							No	No	Yes	No	No	Yes	No	Yes	No	Yes	No	No	Rabies	Yes	Yes	No	Yes	Yes	Yes	No	No	No	No	No	No	No	No	Yes	Dog	No	No
633	P630	2020-02-12	PMSS	10	B	15	Female	Day scholar	Town	Military (RBP,RBA,RBG)	Housewife	No							No	No	No	No	Yes	No	No	Yes	Yes	No	No	No	Rabies	Yes	Yes	No	Yes	Yes	Yes	No	No	No	No	Yes	No	Yes	Yes	No	Dog	No	No
634	P631	2020-02-12	PMSS	10	B	14	Female	Day scholar	Town	Bussinessman	Housewife	No							No	No	No	No	Yes	No	No	Yes	No	No	No	No	Rabies	Yes	Yes	No	No	Yes	No	No	No	No	No	No	Yes	No	Yes	No	Dog	No	No
635	P632	2020-02-12	PMSS	10	B	17	Female	Day scholar	Town	Private/coorporate employee	Housewife	No							No	No	No	No	Yes	Yes	No	Yes	Yes	No	No	No	Rabies	Yes	Yes	No	No	No	Yes	Yes	No	Yes	No	Yes	Yes	No	Yes	No	Dog	No	No
636	P633	2020-02-12	PMSS	10	C	19	Female	Day scholar	Town	Private/coorporate employee	Private/coorporate employee	No							No	No	No	No	No	Yes	No	Yes	No	No	No	No	Rabies	Yes	Yes	No	No	No	No	No	No	Yes	No	No	No	No	No	No	Dog	No	No
637	P634	2020-02-12	PMSS	10	C	18	Male	Day scholar	Town	Military (RBP,RBA,RBG)	Housewife	No							No	No	Yes	Yes	Yes	Yes	No	Yes	Yes	No	No	No	Rabies, paralysis	Yes	Yes	No	No	Yes	Yes	Yes	No	Yes	Yes	Yes	No	Yes	No	No	Dog	Yes	No
638	P635	2020-02-12	PMSS	10	C	16	Female	Day scholar	Town	Military (RBP,RBA,RBG)	Housewife	Yes	1	Adopted from street	Free roaming all the time	No		No	No	No	No	No	Yes	Yes	No	Yes	Yes	No	No	No	Rabies	Yes	Yes	No	Yes	Yes	Yes	No	No	No	No	No	No	Yes	No	No	Dog	No	No
639	P636	2020-02-12	PMSS	10	C	15	Female	Day scholar	Town	Bussinessman	Housewife	No							No	No	No	No	No	Yes	No	Yes	Yes	No	No	No	Rabies	Yes	Yes	No	Yes	Yes	Yes	No	No	No	No	No	No	Yes	No	No	Dog	No	No
640	P637	2020-02-12	PMSS	10	C	15	Male	Day scholar	Town	Bussinessman	Bussinesswomen	No							No	No	No	No	Yes	Yes	Yes	Yes	Yes	No	No	No	Rabies	Yes	Yes	No	No	Yes	Yes	Yes	No	No	No	No	No	Yes	Yes	No	Dog	No	No
641	P638	2020-02-12	PMSS	10	C	16	Male	Day scholar	Town	Private/coorporate employee	Housewife	No							No	No	No	No	Yes	No	No	Yes	Yes	Yes	No	No	Rabies	Yes	Yes	No	Yes	No	Yes	Yes	No	Yes	No	No	No	Yes	No	No	Dog	No	No
642	P638	2020-02-12	PMSS	10	C	16	Female	Day scholar	Town	Private/coorporate employee	Private/coorporate employee	No							No	No	No	No	Yes	No	No	Yes	Yes	Yes	No	No	Rabies	Yes	Yes	No	Yes	No	Yes	No	No	No	No	No	No	Yes	Yes	No	Dog	No	No
643	P639	2020-02-12	PMSS	10	C	15	Male	Day scholar	Town	Government employee	Bussinesswomen	No							No	Yes	No	No	Yes	Yes	No	Yes	Yes	No	No	No	Rabies	Yes	Yes	Yes	Yes	Yes	Yes	Yes	No	No	No	Yes	No	Yes	No	No	Bat	Yes	No
644	P640	2020-02-12	PMSS	10	C	14	Female	Day scholar	Town	Private/coorporate employee	Government employee	No							No	No	No	No	Yes	Yes	No	Yes	No	Yes	No	No	Rabies	Yes	Yes	No	Yes	Yes	Yes	No	No	No	No	No	No	No	No	Yes	Dog	No	No
645	P641	2020-02-12	PMSS	10	C	15	Male	Day scholar	Town	Military (RBP,RBA,RBG)	Housewife	No							No	No	No	No	Yes	Yes	No	Yes	Yes	Yes	No	No	Rabies	Yes	Yes	No	Yes	Yes	Yes	Yes	No	Yes	No	Yes	No	Yes	No	No	Dog	No	No
646	P642	2020-02-12	PMSS	10	C	16	Male	Day scholar	Town	Military (RBP,RBA,RBG)	Housewife	No							No	Yes	Yes	No	No	Yes	No	Yes	Yes	No	No	No	Rabies & mange	Yes	Yes	No	Yes	Yes	Yes	Yes	No	Yes	No	No	No	Yes	Yes	No	Dog	No	No
647	P643	2020-02-12	PMSS	10	C	14	Female	Day scholar	Town	Others(Specify)...........	Private/coorporate employee	No							No	Yes	No	No	No	Yes	No	Yes	No	No	No	No	Rabies & mange	Yes	Yes	No	Yes	No	Yes	Yes	No	No	No	No	Yes	No	Yes	No	Dog	No	No
648	P644	2020-02-12	PMSS	10	C	15	Female	Day scholar	Town	Private/coorporate employee	Bussinesswomen	No							No	No	No	No	Yes	Yes	No	Yes	Yes	No	No	No	Rabies	Yes	No	No	Yes	No	Yes	No	No	No	No	Yes	No	Yes	No	No	Dog	No	No
649	P645	2020-02-12	PMSS	10	C	16	Male	Day scholar	Town	Private/coorporate employee	Housewife	No							No	Yes	Yes	Yes	Yes	Yes	No	Yes	Yes	Yes	No	No	Rabies & mange	Yes	Yes	No	Yes	Yes	Yes	Yes	No	Yes	No	Yes	No	Yes	Yes	No	Dog	No	No
650	P646	2020-02-12	PMSS	10	C	15	Female	Day scholar	Town	Government employee	Bussinesswomen	No							No	Yes	No	No	Yes	Yes	No	Yes	Yes	No	No	No	Rabies & mange	Yes	Yes	No	Yes	No	Yes	No	No	No	No	Yes	Yes	Yes	Yes	No	I don't know	No	No
651	P647	2020-02-12	PMSS	10	C	16	Male	Day scholar	Town	Military (RBP,RBA,RBG)	Housewife	No							No	No	No	No	Yes	No	No	Yes	No	No	No	No	Rabies & mange	Yes	No	No	Yes	No	No	No	No	No	No	Yes	No	Yes	No	No	Dog	No	No
652	P648	2020-02-12	PMSS	10	C	14	Male	Day scholar	Town	Private/coorporate employee	Housewife	No							No	No	No	No	Yes	No	No	Yes	No	No	No	No	Rabies & mange	Yes	No	No	Yes	No	No	No	No	No	No	Yes	No	Yes	No	No	Dog	No	No
653	P649	2020-02-12	PMSS	10	C	14	Female	Day scholar	Town	Government employee	Housewife	Yes	2	Given by neighbour's/friends	Keep inside the house compound all the time	Yes	Every year	Yes	No	No	No	No	Yes	Yes	No	Yes	No	Yes	No	No	Vomiting,rabies	Yes	Yes	No	No	Yes	No	No	No	No	Yes	No	No	No	No	No	Dog	No	No
654	P650	2020-02-12	PMSS	10	C	17	Female	Day scholar	Town	Private/coorporate employee	Government employee	No							No	No	No	No	No	Yes	No	Yes	Yes	No	No	No	Rabies	Yes	Yes	Yes	Yes	Yes	Yes	Yes	No	Yes	Yes	Yes	Yes	No	No	No	Bat	No	No
655	P651	2020-02-12	PMSS	10	C	15	Male	Day scholar	Town	Government employee	Government employee	No							No	Yes	No	No	Yes	Yes	Yes	Yes	Yes	Yes	No	No	Rabies	Yes	Yes	Yes	Yes	Yes	Yes	Yes	No	Yes	Yes	No	No	Yes	Yes	No	Dog	Yes	No
656	P652	2020-02-12	PMSS	10	C	16	Female	Day scholar	Town	Government employee	Private/coorporate employee	Yes	1	Given by neighbour's/friends	Keep inside the house compound all the time	Yes	Every year	I don't know	Yes	No	No	Yes	No	No	No	Yes	Yes	No	No	No	Rabies	Yes	Yes	No	Yes	Yes	Yes	Yes	No	No	No	Yes	No	Yes	Yes	No	Dog	Yes	No
657	P653	2020-02-12	PMSS	10	C	15	Female	Day scholar	Town	Government employee	Housewife	No							No	Yes	No	Yes	Yes	Yes	No	Yes	Yes	No	No	No	Rabies	Yes	Yes	No	Yes	Yes	Yes	Yes	No	No	No	Yes	No	Yes	Yes	No	Dog	Yes	No
658	P654	2020-02-12	PMSS	10	C	16	Female	Day scholar	Village	Farmer	Farmer	No							No	Yes	No	No	Yes	Yes	No	Yes	Yes	Yes	No	No		Yes	Yes	No	No	No	Yes	Yes	No	Yes	No	Yes	No	No	Yes	No	Bat	Yes	No
659	P655	2020-02-12	PMSS	10	C	16	Male	Day scholar	Town	Government employee	Housewife	No							No	Yes	Yes	Yes	Yes	Yes	No	Yes	No	Yes	No	No	Rabies & mange	Yes	Yes	Yes	Yes	Yes	Yes	Yes	No	Yes	No	No	No	No	No	No	Dog	Yes	No
660	P656	2020-02-12	PMSS	10	C	15	Female	Day scholar	Town	Private/coorporate employee	Private/coorporate employee	No							No	No	Yes	Yes	Yes	Yes	No	Yes	Yes	No	No	No	Rabies	Yes	Yes	No	Yes	No	Yes	No	No	No	No	No	No	No	Yes	No	Dog	No	No
661	P657	2020-02-12	PMSS	10	C	17	Female	Day scholar	Town	Military (RBP,RBA,RBG)	Housewife	No							No	No	No	Yes	Yes	Yes	No	Yes	Yes	No	No	No	Rabies	Yes	Yes	No	Yes	Yes	No	Yes	No	No	No	Yes	No	No	Yes	No	Dog	Yes	Yes
662	P658	2020-02-12	PMSS	10	C	15	Female	Day scholar	Town	Private/coorporate employee	Housewife	No							No	No	No	No	Yes	Yes	Yes	Yes	No	No	No	No	Rabies,mange, TVT	Yes	Yes	No	Yes	Yes	Yes	Yes	No	No	No	Yes	No	Yes	Yes	No	Dog	No	No
663	P659	2020-02-12	PMSS	10	C	16	Female	Day scholar	Town	Private/coorporate employee	Housewife	No							No	No	No	No	Yes	Yes	Yes	Yes	No	No	No	No	Rabies , Mange, TVT	Yes	Yes	No	Yes	Yes	No	No	No	No	No	Yes	No	Yes	Yes	No	Dog	No	No
664	P660	2020-02-12	PMSS	10	C	15	Male	Day scholar	Town	Government employee	Government employee	No							No	No	No	Yes	Yes	Yes	No	Yes	Yes	No	No	No	Rabies & mange	Yes	Yes	No	No	Yes	No	Yes	No	Yes	No	Yes	No	Yes	No	No	Dog	Yes	No
665	P661	2020-02-12	PMSS	10	C	15	Female	Day scholar	Town	Private/coorporate employee	Government employee	No							No	No	No	No	Yes	Yes	No	Yes	Yes	No	No	No	Rabies	Yes	Yes	Yes	No	No	No	No	No	No	No	No	Yes	No	No	No	Birds	No	No
666	P662	2020-02-12	PMSS	10	C	16	Female	Day scholar	Town	Private/coorporate employee	Private/coorporate employee	No							No	No	No	No	Yes	Yes	No	Yes	Yes	No	No	No	Rabies	Yes	No	No	Yes	Yes	No	No	No	No	No	No	No	Yes	Yes	No	Dog	No	No
667	P663	2020-02-12	PMSS	10	C	15	Male	Day scholar	Town	Government employee	Housewife	No							No	Yes	Yes	No	Yes	Yes	No	Yes	Yes	No	No	No	Rabies	Yes	Yes	No	No	Yes	Yes	Yes	No	No	No	Yes	No	Yes	Yes	No	Dog	Yes	No
668	P664	2020-02-12	PMSS	10	C	16	Male	Day scholar	Town	Government employee	Housewife	No							No	No	No	No	No	Yes	No	Yes	No	No	No	No	Rabies & mange	Yes	No	Yes	No	No	No	No	No	No	No	No	No	No	Yes	No	Dog	No	No
669	P665	2020-02-12	PMSS	10	C	15	Female	Day scholar	Town	Bussinessman	Housewife	No							No	Yes	No	No	Yes	Yes	No	Yes	No	No	No	No	Rabies & mange	Yes	Yes	No	Yes	Yes	No	Yes	No	No	No	Yes	No	Yes	Yes	No	Bat	Yes	Yes
670	P666	2020-02-12	PMSS	10	C	14	Male	Day scholar	Town	Private/coorporate employee	Housewife	No							No	No	Yes	Yes	Yes	Yes	Yes	Yes	No	Yes	No	No	Rabies & mange	Yes	Yes	Yes	Yes	Yes	Yes	No	No	No	No	No	No	No	No	Yes	Dog	No	No
671	P667	2020-02-12	PMSS	10	C	17	Female	Day scholar	Town	Government employee	Others(Specify)................	Yes	2	Adopted from street	Keep inside the house compound all the time	Yes	Every year	Yes	No	No	No	No	Yes	Yes	No	Yes	No	No	No	No	Rabies	Yes	No	No	No	No	No	No	Yes	No	No	Yes	No	No	No	No	Dog	No	No
672	P668	2020-02-12	PMSS	10	D	17	Male	Day scholar	Town	Others(Specify)...........	Others(Specify)................	Yes	1	Given by neighbour's/friends	Keep inside the house compound all the time	Yes	Sometimes	Yes	No	No	No	Yes	No	Yes	Yes	Yes	No	No	No	Yes	Rabies	Yes	Yes	No	No	No	No	No	No	No	No	No	No	Yes	Yes	No	Dog	No	No
673	P669	2020-02-12	PMSS	10	D	18	Male	Day scholar	Town	Private/coorporate employee	Housewife	No							No	No	Yes	No	No	Yes	No	Yes	No	Yes	No	No	Rabies	Yes	No	No	Yes	No	Yes	Yes	No	No	No	No	No	Yes	Yes	No	Dog	No	No
674	P670	2020-02-12	PMSS	10	D	15	Male	Day scholar	Town	Bussinessman	Housewife	No							Yes	No	No	Yes	No	Yes	No	Yes	Yes	No	No	No	Rabies	Yes	No	No	Yes	No	No	No	No	No	No	No	No	Yes	No	No	Dog	No	No
675	P671	2020-02-12	PMSS	10	D	15	Female	Day scholar	Town	Military (RBP,RBA,RBG)	Government employee	No							No	No	Yes	No	No	Yes	No	Yes	No	No	No	No	Rabies	Yes	Yes	No	Yes	No	Yes	No	No	No	No	No	No	Yes	Yes	No	Dog	No	No
676	P672	2020-02-12	PMSS	10	D	14	Male	Day scholar	Town	Bussinessman	Bussinesswomen	No							No	No	No	No	Yes	Yes	No	Yes	Yes	No	No	No	Rabies	Yes	No	No	Yes	Yes	Yes	Yes	No	No	No	No	Yes	Yes	Yes	No	Dog	No	No
677	P673	2020-02-12	PMSS	10	B	15	Male	Day scholar	Town	Government employee	Housewife	No							No	No	No	No	Yes	Yes	No	Yes	No	No	No	No	Rabies	Yes	No	No	Yes	No	No	No	No	Yes	No	No	No	No	No	No	Dog	No	No
678	P674	2020-02-12	PMSS	10	D	15	Female	Day scholar	Town	Private/coorporate employee	Housewife	No							No	No	No	No	Yes	Yes	No	Yes	No	No	No	No	Rabies	Yes	No	No	No	Yes	Yes	No	No	No	No	No	No	Yes	Yes	No	Dog	No	No
679	P675	2020-02-12	PMSS	10	D	14	Female	Day scholar	Town	Government employee	Housewife	No							No	No	No	No	Yes	Yes	No	Yes	No	No	No	No	Rabies	Yes	No	No	No	Yes	Yes	No	No	No	No	Yes	No	Yes	No	No	Dog	No	No
680	P676	2020-02-12	PMSS	10	D	15	Female	Day scholar	Town	Government employee	Housewife	No							No	Yes	No	No	Yes	No	No	Yes	Yes	No	No	No		Yes	Yes	No	Yes	No	No	No	No	Yes	No	No	No	Yes	No	No	Dog	No	No
681	P677	2020-02-12	PMSS	10	D	15	Female	Day scholar	Town	Others(Specify)...........	Private/coorporate employee	No							No	Yes	No	No	No	No	No	Yes	Yes	No	No	No		No	No	No	No	No	No	No	No	No	No	No	No	No	No	No		No	No
682	P678	2020-02-12	PMSS	10	D	16	Male	Day scholar	Town	Military (RBP,RBA,RBG)	Housewife	No							No	No	No	No	Yes	Yes	No	Yes	Yes	No	No	No	Rabies & mange	Yes	Yes	No	Yes	No	Yes	Yes	No	No	No	Yes	No	Yes	Yes	No	Dog	No	No
683	P679	2020-02-12	PMSS	10	D	14	Female	Day scholar	Village	Government employee	Housewife	No							No	Yes	No	No	Yes	Yes	No	Yes	No	Yes	No	No		Yes	No	No	Yes	Yes	Yes	No	No	No	No	No	Yes	No	Yes	No	Dog	Yes	Yes
684	P680	2020-02-12	PMSS	10	D	15	Male	Day scholar	Town	Private/coorporate employee	Government employee	No							No	No	No	No	Yes	No	No	Yes	No	No	No	No	Rabies & mange	Yes	No	No	No	Yes	No	Yes	No	No	No	No	No	Yes	Yes	No	I don't know	No	No
685	P681	2020-02-12	PMSS	10	D	16	Male	Day scholar	Town	Bussinessman	Housewife	No							No	No	Yes	No	No	No	No	Yes	No	No	No	No		Yes	No	No	Yes	No	No	No	No	No	No	No	No	Yes	No	No	Dog	No	No
686	P682	2020-02-12	PMSS	10	D	15	Male	Day scholar	Town	Military (RBP,RBA,RBG)	Housewife	No							No	No	No	Yes	No	No	No	Yes	No	No	No	No		Yes	No	No	Yes	No	No	No	No	No	No	Yes	No	No	Yes	No	Dog	Yes	No
687	P683	2020-02-12	PMSS	10	D	16	Male	Day scholar	Town	Government employee	Government employee	Yes	1	Adopted from street	Let it roam freely outside during daytime	Yes	Every year	I don't know	Yes	No	Yes	Yes	Yes	No	No	Yes	No	Yes	No	No	Rabies	Yes	No	No	Yes	No	No	No	No	Yes	No	Yes	Yes	Yes	No	No	Dog	Yes	No
688	P684	2020-02-12	PMSS	10	D	15	Female	Day scholar	Town	Government employee	Government employee	No							No	No	No	No	Yes	Yes	No	Yes	Yes	No	No	No	Rabies	Yes	Yes	No	Yes	No	No	No	No	No	No	Yes	No	Yes	No	No	Dog	No	No
689	P585	2020-02-12	PMSS	10	D	15	Female	Day scholar	Town	Government employee	Housewife	Yes	1	Given by neighbour's/friends	Keep inside the house compound all the time	Yes	I don't know	I don't know	No	No	No	No	No	Yes	No	Yes	No	No	No	No	Rabies	Yes	Yes	No	No	No	No	No	No	No	No	No	No	No	No	Yes	Dog	No	No
690	P686	2020-02-12	PMSS	10	D	16	Male	Day scholar	Town	Government employee	Housewife	No							No	No	No	Yes	No	Yes	No	Yes	Yes	Yes	No	No	Rabies & mange	Yes	Yes	No	No	Yes	Yes	Yes	No	Yes	No	Yes	No	No	No	No	Dog	No	No
691	P687	2020-02-12	PMSS	10	D	16	Female	Day scholar	Town	Private/coorporate employee	Housewife	No							No	No	No	No	Yes	No	No	Yes	No	No	No	No	Mange	Yes	Yes	Yes	No	Yes	Yes	Yes	No	Yes	No	No	No	Yes	Yes	No	Dog	No	No
692	P688	2020-02-12	PMSS	10	D	14	Female	Day scholar	Town	Military (RBP,RBA,RBG)	Bussinesswomen	Yes	2	Given by neighbour's/friends	Keep inside the house compound all the time	Yes	Sometimes	No	No	No	No	No	Yes	No	No	Yes	No	No	No	No	Rabies & mange	Yes	No	No	No	No	No	Yes	No	No	No	No	No	Yes	No	No	Dog	No	No
693	P689	2020-02-12	PMSS	10	D	17	Male	Day scholar	Town	Government employee	Housewife	No							No	No	Yes	Yes	No	No	No	Yes	Yes	No	No	No	Rabies & mange	Yes	No	No	Yes	No	No	Yes	No	No	No	No	No	Yes	Yes	No	Dog	No	No
694	P690	2020-02-12	PMSS	10	D	14	Female	Day scholar	Town	Government employee	Bussinesswomen	No							No	No	No	No	Yes	Yes	No	Yes	Yes	Yes	No	No	Rabies	Yes	No	No	Yes	Yes	Yes	Yes	No	No	No	No	No	No	No	Yes	Dog	No	No
695	P691	2020-02-12	PMSS	10	D	15	Male	Day scholar	Town	Government employee	Private/coorporate employee	Yes	1	Purchased from other people in Bhutan	Let it roam freely outside during daytime	Yes	Every year	I don't know	No	No	No	No	Yes	Yes	No	Yes	No	No	No	No	Mange	Yes	Yes	No	Yes	No	Yes	Yes	No	Yes	No	Yes	No	No	No	No	Dog	No	No
696	P692	2020-02-12	PMSS	10	D	14	Female	Day scholar	Town	Bussinessman	Private/coorporate employee	No							No	No	No	No	Yes	Yes	No	Yes	No	Yes	No	No	Rabies	Yes	No	No	Yes	Yes	Yes	Yes	No	No	No	No	No	No	No	Yes	Dog	No	No
697	P693	2020-02-12	PMSS	10	D	15	Male	Day scholar	Town	Private/coorporate employee	Housewife	No							No	Yes	No	No	No	No	No	Yes	No	No	No	No	Rabies & mange	Yes	No	No	No	No	No	Yes	No	No	No	No	No	No	No	Yes	Dog	No	No
698	P694	2020-02-12	PMSS	10	D	15	Female	Day scholar	Town	Private/coorporate employee	Bussinesswomen	Yes	1	Given by neighbour's/friends	Keep inside the house compound all the time	Yes	Sometimes	I don't know	No	Yes	No	No	Yes	Yes	No	Yes	Yes	No	No	No	Rabies & mange	Yes	Yes	No	Yes	Yes	Yes	No	No	No	No	Yes	No	Yes	No	No	Dog	No	No
699	P695	2020-02-12	PMSS	10	D	16	Female	Day scholar	Town	Private/coorporate employee	Housewife	No							No	Yes	No	No	Yes	Yes	No	Yes	Yes	No	No	No	Rabies & mange	Yes	Yes	Yes	Yes	No	Yes	No	No	No	No	Yes	No	Yes	Yes	No	Dog	No	No
700	P696	2020-02-12	PMSS	10	D	15	Female	Day scholar	Town	Private/coorporate employee	Private/coorporate employee	No							No	No	No	No	Yes	Yes	Yes	Yes	Yes	No	No	No	Rabies & mange	Yes	Yes	No	Yes	Yes	Yes	Yes	No	No	No	Yes	No	Yes	No	No	Dog	No	No
701	P697	2020-02-12	PMSS	10	D	17	Male	Day scholar	Town	Bussinessman	Housewife	Yes	1	Purchased from outside the country	Keep inside the house compound all the time	Yes	Every year	Yes	Yes	No	No	No	No	No	No	Yes	No	No	No	No	Rabies, corona virus	Yes	Yes	No	No	No	No	No	No	No	No	No	No	No	No	Yes	Dog	Yes	No
702	P698	2020-02-12	PMSS	10	D	15	Female	Day scholar	Town	Government employee	Housewife	No							No	No	No	No	Yes	Yes	No	Yes	Yes	No	No	No	Rabies	Yes	Yes	Yes	Yes	Yes	Yes	Yes	No	No	No	No	No	Yes	Yes	No	Dog	No	No
703	P699	2020-02-12	PMSS	10	B	16	Female	Day scholar	Town	Private/coorporate employee	Housewife	No							No	No	No	No	Yes	Yes	No	Yes	Yes	No	No	No	Mange	Yes	Yes	No	Yes	No	Yes	No	No	Yes	No	No	Yes	No	Yes	No	Dog	No	No
704	P700	2020-02-12	PMSS	10	D	15	Female	Day scholar	Town	Bussinessman	Government employee	No							No	No	No	No	Yes	No	No	Yes	Yes	No	No	No	Rabies	Yes	No	No	No	No	No	No	Yes	Yes	No	No	No	Yes	No	No	Dog	No	No
[truncated: 76 more columns]
